# Supplementary material for: Development and Preclinical Evaluation of New Inhaled Lipoglycopeptides for the Treatment of Persistent Pulmonary Methicillin-Resistant Staphylococcus aureus Infections
Source: PubMed Central journal article supplement (PMC8373216; doi:10.1128/aac.00316-21), 2021-06-17
Supplement: aac.00316-21-s0001.pdf [file aac.00316-21-s0001.pdf]

1 **Supplemental Materials: Development and Preclinical Evaluation of New Inhaled**

2 **Lipoglycopeptides for the Treatment of Persistent Pulmonary MRSA Infections**

3 **Authors:** Adam J. Plaunt, Sasha J. Rose, Jeong Yeon Kang, Kuan-Ju Chen, Daniel LaSala, Ryan P. Heckler, Arielle

4 Dorfman, Barrett T. Smith, Donald Chun, Veronica Viramontes, Antonio Macaluso, Zhili Li, Yuchen Zhou, Lilly

5 Mark, Jessica Basso, Franziska G. Leifer, Michel R. Corboz, Richard W. Chapman, David Cipolla, Walter R. Perkins,

6 Vladimir S. Malinin, and Donna M. Konicek#

7

8 Insmmed Incorporated, Bridgewater, New Jersey, USA

9

10 # Address correspondence to Donna M. Konicek, [donna.konicek@insmed.com](mailto:donna.konicek@insmed.com)

11 **CONTENTS**

|    |                                                                 |    |
|----|-----------------------------------------------------------------|----|
| 12 | METHODS.....                                                    | 3  |
| 13 | ENZYME HYDROLYSIS.....                                          | 6  |
| 14 | PLASMA STABILITY .....                                          | 8  |
| 15 | RV LIPOGLYCOPEPTIDE AND COMPARATOR PK .....                     | 9  |
| 16 | EXPANDED PANEL MIC.....                                         | 10 |
| 17 | BIOFILM GROWTH MODEL .....                                      | 12 |
| 18 | <i>IN VITRO</i> CELL CYTOTOXICITY .....                         | 13 |
| 19 | EXPERIMENTAL COMPOUNDS .....                                    | 14 |
| 20 | SYNTHESIS PROCEDURES .....                                      | 15 |
| 21 | REPRESENTATIVE PREPARATION OF A CONVENTIONAL ESTER – RV65 ..... | 19 |
| 22 | REPRESENTATIVE PREPARATION OF AN INVERTED ESTER – RV55.....     | 22 |
| 23 | REPRESENTATIVE PREPARATION OF A CONVENTIONAL AMIDE – RV62 ..... | 25 |
| 24 | REPRESENTATIVE PREPARATION OF AN INVERTED AMIDE – RV94.....     | 29 |
| 25 | PREPARATION OF RV LIPOGLYCOPEPTIDE METABOLITES .....            | 33 |
| 26 | PREPARATION OF RV LIPOGLYCOPEPTIDE COMPARATORS .....            | 39 |
| 27 | CHEMICAL CHARACTERIZATION .....                                 | 42 |
| 28 | NMR SPECTRA.....                                                | 42 |
| 29 | MS DATA .....                                                   | 56 |

|    |                                |    |
|----|--------------------------------|----|
| 30 | HPLC & LCMS CHROMATOGRAMS..... | 60 |
| 31 |                                |    |
| 32 |                                |    |

## 33 **METHODS**

34 **Enzyme hydrolysis.** In general, RV lipoglycopeptides were formulated at pH 8.0 either as an aqueous  
35 solution or a suspension with hydroxy-beta-cyclodextrin (HPCD) as the primary excipient. To solutions of  
36 formulated RV lipoglycopeptide derivatives were added the target enzyme as a solution in PBS. The  
37 solutions were placed in an incubated shaker set to 37 °C and aliquots were removed at pre-specified time  
38 points (typically 0, 15, 30, 45, 60, 75, 90, and 120 minutes). Enzyme activity was halted by dilution in acidic  
39 media. The aliquots were then assessed by HPLC to monitor conversion from the parent lipoglycopeptide  
40 to the primary metabolite. Results are presented graphically as the percent degradation vs. time where  
41 percent degradation is defined as follows:

$$42 \quad \text{Percent Degradation} = \frac{[\text{Metabolite}]}{[\text{LGPC}] + [\text{Metabolite}]} \times 100$$

44  
45 Enzymes studied include:

- 46 • Esterase from Porcine Liver (Sigma Aldrich, E3019)
- 47 • Carboxypeptidase A from bovine pancreas (Sigma Aldrich, C9268)
- 48 • Protease from *Aspergillus oryzae* (Sigma Aldrich, P6110)
- 49 • Papain from papaya latex (Sigma Aldrich, P4762)
- 50 • Protease from *Bacillus licheniformis* (Sigma Aldrich, P5380)
- 51 • Protease from Bovine Pancreas (Sigma Aldrich, P4630)

52  
53 **MIC Testing.** Select compounds were advanced into susceptibility testing against an expanded panel of  
54 gram-positive and gram-negative organisms using broth microdilution at Micromyx LLC (Kalamazoo, MI)  
55 and these organisms are listed in Table S2. The test organisms in the expanded screening panel consisted  
56 of clinical isolates from the Micromyx internal repository, as well as reference strains acquired from the  
57 ATCC and the Network on Antimicrobial Resistance in *S. aureus* (NARSA; BEI, Manassas, VA). RV94 was

58 evaluated against Vancomycin-Resistant *S. Aureus* (VRSA) at JMI Laboratories (North Liberty, IA) and the  
59 test organisms were acquired from the NARSA repository (BEI, Manassas, VA).

60

61 **Plasma stability.** Stock solutions of RV lipoglycopeptide derivatives RV62 and RV65 were prepared in  
62 100% DMSO. Stock solutions were diluted using rat plasma to contain less than 1% organic solvent with  
63 a final drug concentration of 50 µg/mL. Samples were briefly vortexed and then incubated in a shaker set  
64 to 37 °C and 300 rpm. Aliquots were removed at specified time points and store at – 80 °C until extraction  
65 (10% trichloroacetic acid in acetonitrile) and analysis (LC/MS).

66

67 **Crystal violet staining of biofilm.** Biofilms were grown on the pegs of the lid under shaking conditions  
68 for 24 h based on the protocol above at 37 °C with various culture conditions (TSB only, TSB with 1%  
69 glucose, TSB with either 1%, 2.5%, or 10% human plasma, TSB with either 1%, 10%, or 50% human  
70 serum, TSB with 1% glucose plus 10% human plasma, and TSB with 1% glucose plus 50% human serum;  
71 Both plasma and serum were obtained from BioIVT). The lid was removed, and the pegs were gently  
72 washed twice with 200 µL of PBS to remove nonadherent cells. Lids with biofilms were air-dried for 5 min.  
73 Adherent biofilms on the pegs were stained with 200 µL 0.1% (wt/vol) crystal violet in water for injection  
74 (WFI) for 15 min at room temperature. The pegs were then washed twice with 200 µL of PBS to remove  
75 excess stain. Lids were air-dried for 10 min before de-staining with acetic acid. The pegs were de-stained  
76 with 200 µL of 33% acetic acid to solubilize the dye for 15 min. Quantitative assessment of biofilm formation  
77 was obtained by measuring the absorbance at 600 nm using a plate reader.

78

#### 79 ***In vitro* cell cytotoxicity**

80 THP-1 cells were maintained at 37°C with 5% CO<sub>2</sub> in growth media (RPMI-1640 + 10% Fetal Bovine  
81 Serum) and passaged when cell density had reached roughly 1 x 10<sup>6</sup> cells/mL. PMA-differentiated cells  
82 for experiments were prepared by seeding 40,000 cells per well in clear-bottom black plastic 96-well plates  
83 at a final concentration of 50 ng/mL of PMA in a final volume of 200 uL. Plates were incubated at 37°C for  
84 24 h, after which media was changed twice with growth media (no PMA). Cells were given an additional

85 24 h to recover from PMA treatment after which compound challenge was applied in a total volume of 100  
86  $\mu$ L of media plus compound. After 24 h of compound challenge at 37°C, cell integrity and metabolism  
87 were evaluated using the CellTox Green (Promega G8746) and MTT (Promega G4000) assays,  
88 respectively. For CellTox Green assay 100  $\mu$ L of 2x CellTox Green Reagent was added directly to media  
89 in each well and plates were shaken briefly (1 min) to ensure reagent homogeneity. Plates were incubated  
90 for 15 min at room temperature, shielded from light, after which fluorescence was measured using a plate  
91 reader (Ex500/Em532). Membrane integrity was calculated as percent of lysis control from wells that had  
92 received 4  $\mu$ L of Lysis Solution 30 min prior to addition of CellTox Green Reagent, representing complete  
93 loss of membrane integrity. For MTT assay 15  $\mu$ L of Dye Solution was added directly to media in each  
94 well and plates were shaken briefly, then returned to the 37°C incubator for 2 h. 100  $\mu$ L of Solubilization  
95 Solution/Stop Mix was then added to each well and the plate was incubated for an additional hour at  
96 37°C. Plates were then mixed on an orbital shaker at 700 rpm for 2 min and absorbance at 570 nm was  
97 measured, with a reference wavelength of 650 nm. Results were calculated as percent of no drug control  
98 based on OD readings from wells which did not receive drug challenge.  
99

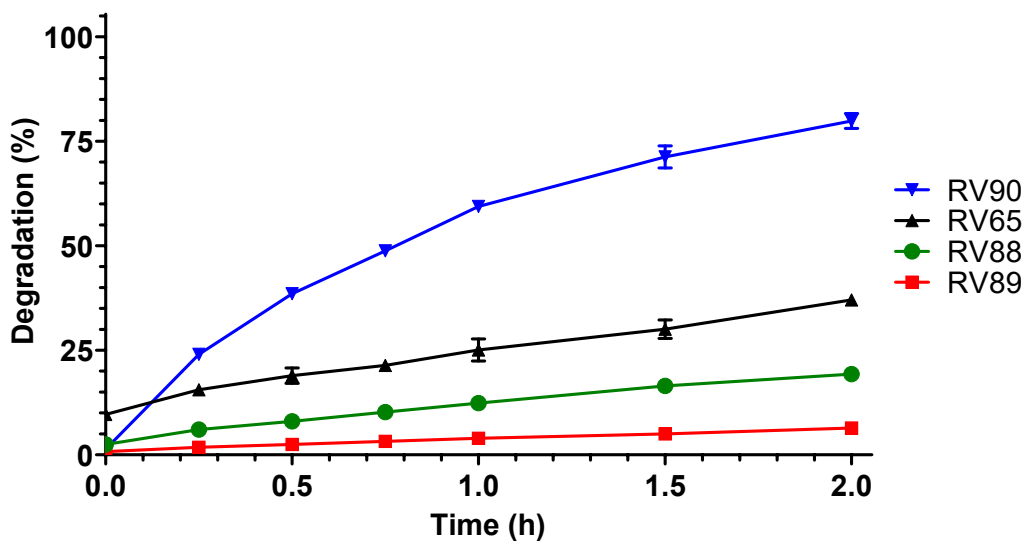

101

102 **Figure S1:** Esterase mediated hydrolysis of conventional ester RV Lipoglycopeptides RV90 (blue triangle,  
103 Octyl), RV65 (black triangle, Dodecyl), RV88 (green circle, Tetradecyl), and RV89 (red squares,  
104 Hexadecyl) was measured as a function of time in the presence of porcine liver esterase; parenthesis  
105 indicate total number of atoms in the cleavable linker. Samples were analyzed by HPLC (UV, 281 nm) to  
106 determine the relative peak area for both the parent RV lipoglycopeptide and the metabolite (RV80) for  
107 each compound tested.

108 **Table S1:** Enzyme hydrolysis of RV62 and RV94 was measured as a function of time in PBS (pH 8) at 37  
 109 °C. Control samples in the absence of enzyme were included as positive controls. Samples were analyzed  
 110 by HPLC detecting the parent RV derivative (RV62 or RV94).

| RV Derivative | Enzyme                                     | [Enzyme], U/mL | Percent RV derivative remaining in HPLC chromatograph, % |       |       |       |       |
|---------------|--------------------------------------------|----------------|----------------------------------------------------------|-------|-------|-------|-------|
|               |                                            |                | 0 h                                                      | 0.5 h | 1 h   | 2 h   | 24 h  |
| RV62          | NA                                         | 0              | 97.14                                                    | 97.14 | 97.38 | 97.07 | NA    |
| RV62          | Carboxypeptidase A from bovine pancreas    | 2              | 96.4                                                     | 95.95 | 96.06 | 95.69 | NA    |
| RV62          | Protease from <i>Aspergillus oryzae</i>    | 2              | 96.73                                                    | 96.17 | 96.63 | 95.76 | NA    |
| RV94          | NA                                         | 0              | 99.74                                                    | NA    | 99.54 | NA    | 98.89 |
| RV94          | Protease from Papain                       | 5              | 99.46                                                    | NA    | 99.39 | NA    | 98.31 |
| RV94          | Protease from <i>Bacillus Lichenformis</i> | 5              | 99.76                                                    | NA    | 99.47 | NA    | 99.43 |
| RV94          | Protease from Bovine Pancreas              | 5              | 99.74                                                    | NA    | 99.36 | NA    | 97.91 |

111

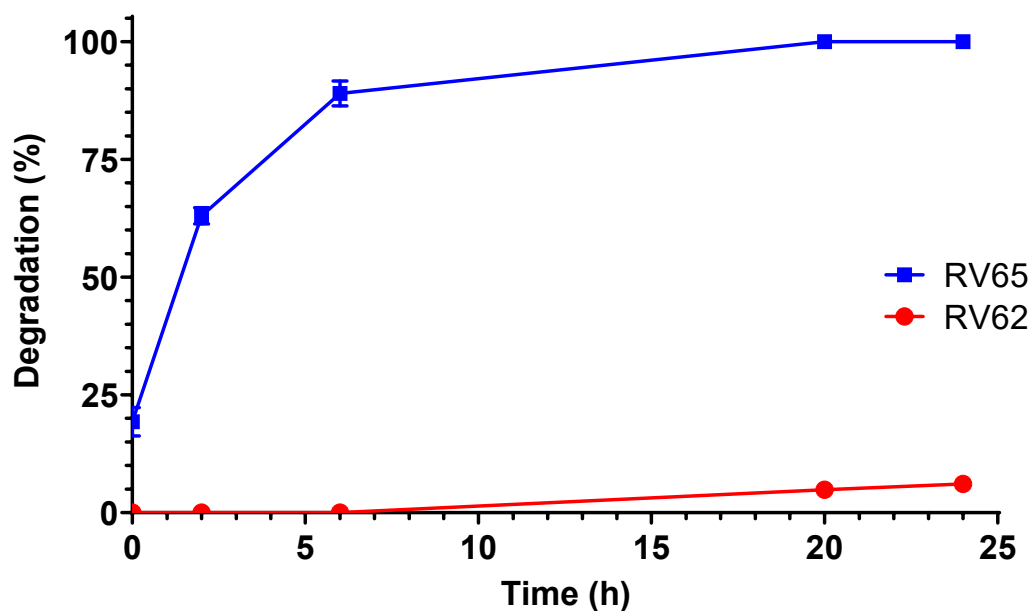

113

114 **Figure S2:** Plasma stability of RV62 (red circles) and RV65 (blue squares) was measured as a function of  
115 time in rat plasma at 37 °C. Samples were analyzed for both the parent RV lipoglycopeptide (RV62 or  
116 RV65) and the primary metabolite (RV82 or RV80, respectively) using LC/MS.

117



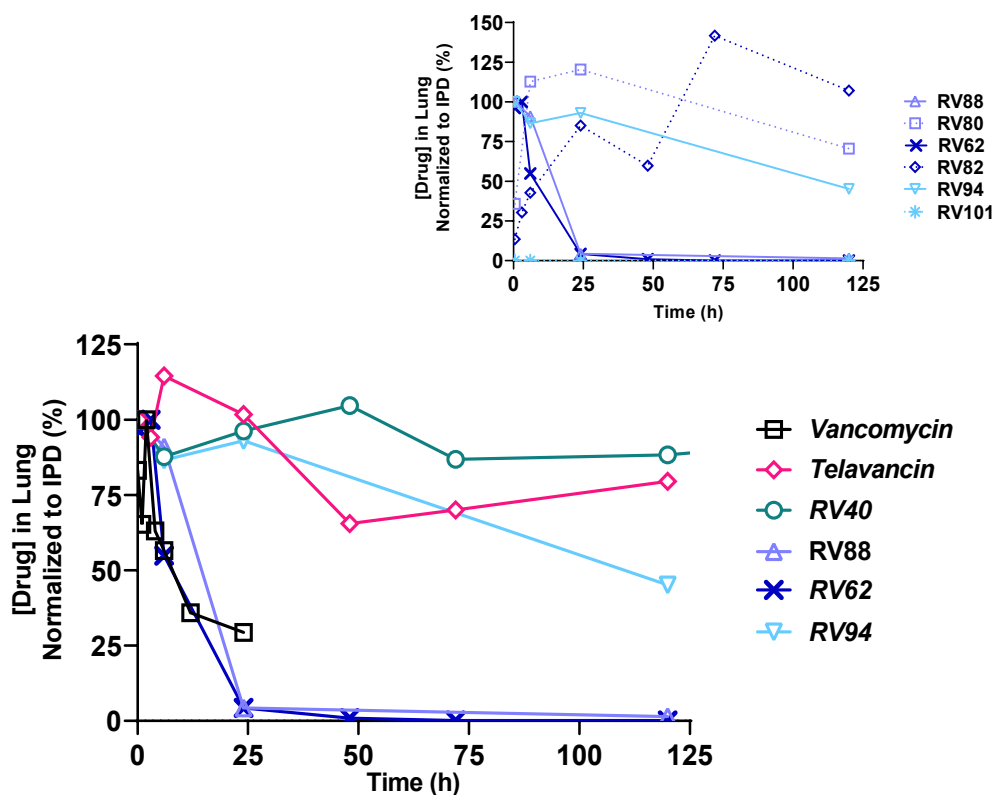

119

120 **Figure S3.** Single dose lung PK of inhaled nebulized RV lipoglycopeptides and comparators administered  
 121 by nose-only inhalation to healthy rats. Data are the average lung level of  $n = 2-4$  animals per timepoint  
 122 and are normalized to the concentration of drug in the lung at immediate post-dose (IPD; assumed to be  
 123 0.5 h). Doses and pharmacokinetic parameters are listed in Table 3. The RV40 experiment was conducted  
 124 for 168 h (7 days) and showed a constant level of lung drug concentration. The vancomycin experiment  
 125 was conducted for 24 h (1 day) and all other experiments were 120 h (5 days). Inset: Ester (RV88) and  
 126 Amide (RV62)-linked RV lipoglycopeptides were rapidly hydrolyzed to their primary byproducts (RV80 and  
 127 RV82, respectively) indicated by the dashed lines that accumulated in the lung over the course of the  
 128 experiment, whereas RV94, an inverted amide remained stable (minimal observed formation of RV101)  
 129 and was eliminated from the lung more efficiently than telavancin and RV40.

130

131 **EXPANDED PANEL MIC**

132 **Table S2.** RV lipoglycopeptide and comparator antibiotic spectrum of activity. ATCC = American Type  
 133 Culture Collection, MMX = Micromyx Collection, NRS = Network on Antimicrobial Resistance in *S. aureus*,  
 134 NCTC = National Collection of Type Cultures. NT = not tested.

| Organism                       | Isolate No.            | Type             | MIC (µg/mL) |            |       |            |
|--------------------------------|------------------------|------------------|-------------|------------|-------|------------|
|                                |                        |                  | RV40        | Telavancin | RV94  | Vancomycin |
| <b>Gram-Positive Organisms</b> |                        |                  |             |            |       |            |
| <i>S. aureus</i>               | ATCC 29213             | MSSA             | 0.008       | 0.06       | 0.015 | 1          |
| <i>S. aureus</i>               | ATCC 13709             | MSSA             | 0.015       | 0.12       | 0.03  | 1          |
| <i>S. aureus</i>               | MMX 7907               | MSSA             | 0.008       | 0.06       | 0.03  | 0.5        |
| <i>S. aureus</i>               | MMX 7908               | MSSA             | 0.015       | 0.12       | 0.015 | 0.5        |
| <i>S. aureus</i>               | NRS123                 | MRSA; USA400     | 0.008       | 0.06       | 0.015 | 0.5        |
| <i>S. aureus</i>               | NRS 384; ATCC BAA-1756 | MRSA; USA300     | 0.008       | 0.06       | 0.015 | 0.5        |
| <i>S. aureus</i>               | MMX 3982               | MRSA; USA300     | 0.008       | 0.06       | 0.015 | 0.5        |
| <i>S. aureus</i>               | ATCC BAA-1556          | MRSA; USA300     | 0.008       | 0.06       | 0.03  | 0.5        |
| <i>S. aureus</i>               | NRS725                 | MRSA; USA300     | 0.008       | 0.06       | 0.015 | 0.5        |
| <i>S. aureus</i>               | ATCC 43300             | MRSA             | 0.008       | 0.06       | 0.015 | 1          |
| <i>S. aureus</i>               | MMX 7899               | MRSA             | 0.008       | 0.06       | 0.015 | 0.5        |
| <i>S. aureus</i>               | MMX 7900               | MRSA             | 0.008       | 0.06       | 0.015 | 0.5        |
| <i>S. aureus</i>               | MMX 7901               | MRSA             | 0.008       | 0.03       | 0.015 | 0.5        |
| <i>S. aureus</i>               | MMX 7902               | MRSA             | 0.015       | 0.06       | 0.03  | 0.5        |
| <i>S. aureus</i>               | MMX 5715               | MRSA             | 0.015       | 0.06       | NT    | NT         |
| <i>S. aureus</i>               | MMX 7903               | MRSA             | 0.008       | 0.06       | 0.015 | 0.5        |
| <i>S. aureus</i>               | NRS23                  | hVISA            | 0.03        | 0.25       | 0.12  | 2          |
| <i>S. aureus</i>               | NRS2                   | hVISA;Mu3        | 0.015       | 0.12       | 0.03  | 1          |
| <i>S. aureus</i>               | NRS1                   | VISA; Mu50       | 0.06        | 0.5        | 0.25  | 4          |
| <i>S. aureus</i>               | NRS52                  | VISA             | 0.03        | 0.25       | 0.06  | 1          |
| <i>S. aureus</i>               | NRS22                  | VISA             | 0.06        | 0.5        | 0.12  | 4          |
| <i>S. aureus</i>               | NRS4                   | VISA             | 0.06        | 0.25       | 0.06  | 4          |
| <i>S. aureus</i>               | NRS13                  | VISA             | 0.03        | 0.12       | 0.12  | 2          |
| <i>S. epidermidis</i>          | ATCC 49134             | MSSE             | 0.015       | 0.12       | 0.015 | 0.5        |
| <i>S. epidermidis</i>          | MMX 762                | MRSE             | 0.008       | 0.12       | 0.03  | 1          |
| <i>S. epidermidis</i>          | MMX 5145               | MRSE             | 0.004       | 0.03       | 0.015 | 1          |
| <i>S. lugdunensis</i>          | MMX 8724               | NA               | 0.004       | 0.06       | 0.015 | 0.25       |
| <i>S. haemolyticus</i>         | ATCC 29970             | NA               | 0.015       | 0.06       | 0.06  | 1          |
| <i>S. hominis</i>              | ATCC 27844             | NA               | 0.015       | 0.06       | 0.03  | 0.5        |
| <i>E. faecalis</i>             | ATCC 29212             | VSE              | 0.015       | 0.12       | 0.03  | 2          |
| <i>E. faecalis</i>             | MMX 4176               | VSE              | 0.03        | 0.25       | 0.03  | 1          |
| <i>E. faecalis</i>             | MMX 1086               | VanA VRE         | 0.5         | 1          | 0.03  | 128        |
| <i>E. faecium</i>              | MMX 4204               | VSE              | 0.004       | 0.06       | 0.015 | 0.5        |
| <i>E. faecium</i>              | MMX 851                | VanA VRE         | 1           | 2          | 2     | 128        |
| <i>E. faecium</i>              | MMX 173                | VanB VRE         | 0.008       | 0.06       | 0.03  | 64         |
| <i>S. pneumoniae</i>           | ATCC 49619             | PISP             | 0.004       | 0.03       | 0.008 | 1          |
| <i>S. pneumoniae</i>           | MMX 747                | PISP             | 0.004       | 0.015      | 0.004 | 0.12       |
| <i>S. pneumoniae</i>           | MMX 432                | PRSP             | ≤0.008      | 0.03       | 0.008 | 0.25       |
| <i>S. pyogenes</i>             | ATCC 19615             | NA               | 0.06        | 0.06       | 0.015 | 0.25       |
| <i>S. pyogenes</i>             | MMX 8778               | NA               | 0.015       | 0.06       | 0.008 | 0.25       |
| <i>S. pyogenes</i>             | MMX 946                | erm <sup>R</sup> | 0.008       | 0.06       | 0.008 | 0.25       |
| <i>S. agalactiae</i>           | ATCC 13813             | NA               | 0.008       | 0.06       | 0.03  | 0.25       |
| <i>S. agalactiae</i>           | MMX 4088               | NA               | 0.008       | 0.06       | 0.008 | 0.25       |
| <i>S. agalactiae</i>           | MMX 4115               | erm <sup>R</sup> | 0.008       | 0.06       | 0.004 | 0.25       |
| <i>S. dysgalactiae</i>         | MMX 5121               | NA               | 0.008       | 0.12       | 0.008 | 0.25       |
| <i>S. dysgalactiae</i>         | MMX 5123               | NA               | 0.12        | 0.25       | 0.03  | 0.25       |
| <i>S. dysgalactiae</i>         | MMX 5124               | NA               | 0.015       | 0.03       | 0.008 | 0.25       |

|                                |               |               |       |       |       |      |
|--------------------------------|---------------|---------------|-------|-------|-------|------|
| <i>S. anginosus</i> (AGS)      | ATCC 33397    | NA            | 0.015 | 0.06  | 0.015 | 0.5  |
| <i>S. constellatus</i> (AGS)   | MMX 5677      | NA            | 0.008 | 0.03  | 0.008 | 0.25 |
| <i>S. mitis</i> (MGS)          | ATCC 49456    | NA            | 0.008 | 0.06  | 0.008 | 0.25 |
| <i>S. mitis</i> (MGS)          | MMX 5798      | NA            | 0.03  | 0.03  | 0.008 | 0.25 |
| <i>S. oralis</i> (MGS)         | MMX 5821      | NA            | 0.015 | 0.06  | 0.015 | 0.5  |
| <i>C. difficile</i>            | ATTC 700057   | toxAB-        | 0.06  | 0.12  | 0.015 | 0.25 |
| <i>C. difficile</i>            | ATCC BAA-1805 | ribo 027      | 0.06  | 0.12  | 0.015 | 0.5  |
| <i>C. difficile</i>            | ATCC BAA-1870 | NAP1;ribo 027 | 0.12  | 0.12  | 0.06  | 1    |
| <i>C. perfringens</i>          | ATCC 13124    | NA            | 0.015 | 0.015 | 0.008 | 0.25 |
| <i>P. micros</i>               | MMX 3546      | NA            | 0.06  | 0.12  | NG    | NG   |
| <i>P. anaerobius</i>           | ATCC 27337    | NA            | 0.008 | 0.03  | 0.008 | 0.12 |
| <i>P. acnes</i>                | ATCC 6919     | NA            | 0.008 | 0.03  | 0.008 | 0.25 |
| <i>P. acnes</i>                | ATCC 11827    | NA            | 0.008 | 0.015 | 0.008 | 0.12 |
| <i>E. lenta</i>                | ATCC 43055    | NA            | NT    | NT    | 0.008 | 0.5  |
| <b>Gram-Negative Organisms</b> |               |               |       |       |       |      |
| <i>E. coli</i>                 | ATCC 25922    | non-ESBL      | >64   | NT    | NT    | >64  |
| <i>E. coli</i>                 | MMX 5684      | ESBL (TEM-10) | >64   | NT    | NT    | >64  |
| <i>K. pneumoniae</i>           | MMX 2542      | -             | >64   | NT    | NT    | >64  |
| <i>K. pneumoniae</i>           | MMX 4679      | KPC-2         | >64   | NT    | NT    | >64  |
| <i>P. mirabilis</i>            | ATCC 43071    | -             | >64   | NT    | NT    | >64  |
| <i>P. vulgaris</i>             | MMX 9373      | -             | >64   | NT    | NT    | >64  |
| <i>E. cloacae</i>              | ATCC 49141    | -             | >64   | NT    | NT    | >64  |
| <i>E. cloacae</i>              | ATCC BAA-1143 | AmpC          | >64   | NT    | NT    | >64  |
| <i>C. freundii</i>             | MMX 6602      | -             | >64   | NT    | NT    | >64  |
| <i>S. marcescens</i>           | ATCC 43862    | -             | >64   | NT    | NT    | >64  |
| <i>P. aeruginosa</i>           | ATCC 27853    | -             | >64   | NT    | NT    | >64  |
| <i>P. aeruginosa</i>           | MMX 2562      | MDR           | >64   | NT    | NT    | >64  |
| <i>B. cepacia</i>              | MMX 9040      | -             | >64   | NT    | NT    | >64  |
| <i>A. baumannii</i>            | NCTC 13304    | OXA-27        | >64   | NT    | NT    | >64  |
| <i>A. baumannii</i>            | MMX 3372      | MDR           | 64    | NT    | NT    | >64  |
| <i>A. baumannii</i>            | MMX 6974      | colistinR     | 32    | NT    | NT    | >64  |
| <i>H. influenzae</i>           | ATCC 49247    | BL-           | 64    | NT    | NT    | >64  |
| <i>H. influenzae</i>           | MMX 7988      | BL+           | 32    | NT    | NT    | 64   |
| <i>H. parainfluenzae</i>       | MMX 2529      | -             | 16    | NT    | NT    | 64   |
| <i>M. catarrhalis</i>          | ATCC 8193     | -             | 32    | NT    | NT    | 64   |
| <i>M. catarrhalis</i>          | ATCC 8176     | -             | 1     | NT    | NT    | 32   |
| <i>M. catarrhalis</i>          | MMX 3782      | -             | 1     | NT    | NT    | 16   |

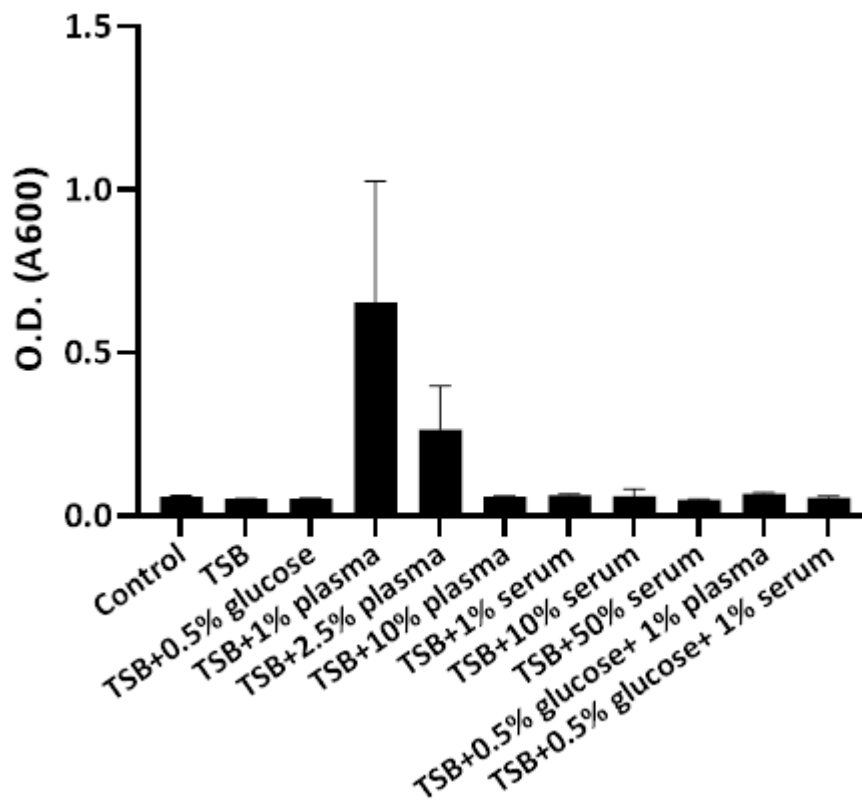

137

138 **Figure S4.** Investigating conditions to enhance biomass on the biofilm growth supports (pegs) for the  
139 MBEC assay from a MRSA ATCC BAA-1556 (USA300) in vitro biofilm using crystal violet staining. TSB =  
140 tryptic soy broth. The condition that generated the greatest degree of biomass in this experiment (TSB +  
141 1% plasma) was used in the MBEC assay system that yield data in Figure 4B.

142

A)

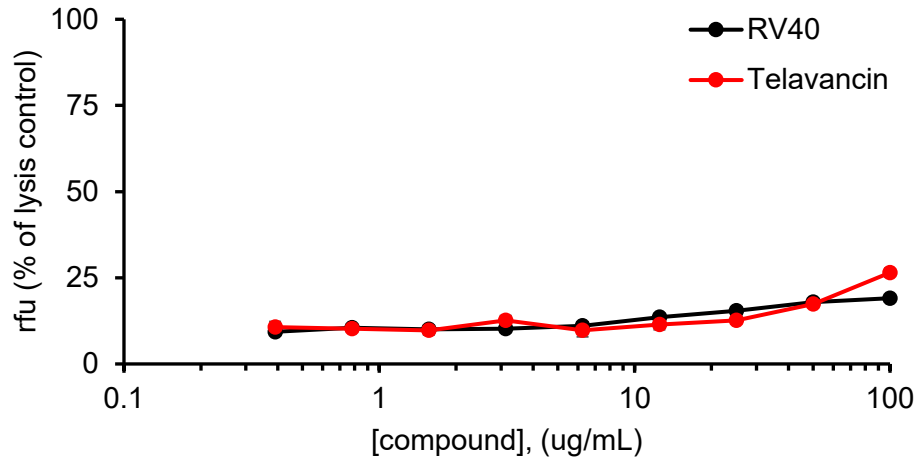

B)

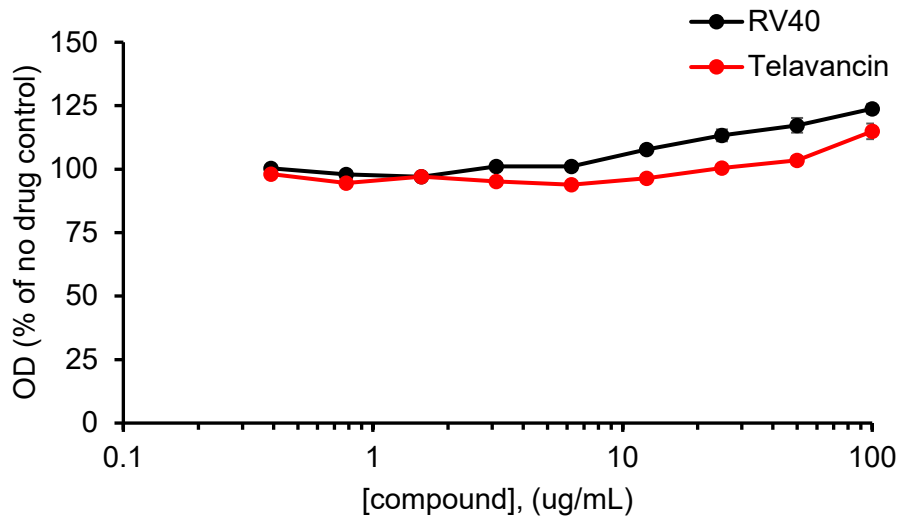

144 **Figure S5.** The *in vitro* cell cytotoxicity of RV40 and telavancin was tested in THP-1 cells using the A) CellTox  
 145 Green and B) MTT cytotoxicity assays. n = 4 measurements; error is SEM.

146 **EXPERIMENTAL COMPOUNDS**

147 Chemicals and reagents were obtained from Sigma-Aldrich (St. Louis, M), Fisher Scientific (Waltham, MA),  
148 or Afla Aesar (Haverhill, MA). Vancomycin HCl was sourced from Chemwerth Incorporated (Woodbridge,  
149 CT). Aldehydes used in reductive amination reactions with vancomycin were typically prepared in-house  
150 via oxidation of an alcohol precursor, though in some instances aldehydes were obtained from commercial  
151 vendors including Astatech Inc (Bristol, PA), Manchester Organics Ltd (Runcorn, UK), and Shanghai  
152 Balmxy Pharmaceutical Co. (Songjiang District, Shanghai, P.R. China); all materials were used as  
153 received. Preparative and flash chromatography was performed using a Waters Prep-150 chromatography  
154 system (Milford, MA). Flash column chromatography supplies were purchased from Biotage (Charlotte,  
155 NC). Preparative HPLC columns were purchased from Phenomenex (Torrance, CA). <sup>1</sup>H nuclear magnetic  
156 resonance (NMR) spectra were obtained using either a Bruker Avance III HD 500 instrument operating  
157 at 500 MHz or a Magritek Spinsolve 60 instrument operating at 60 MHz. <sup>13</sup>C nuclear magnetic resonance  
158 (NMR) spectra were obtained using a Bruker Avance III HD 500 instrument operating at 126 MHz. Raw  
159 NMR data were analyzed using Mestrelab Research Chemistry Software Solutions. Chemical shifts were  
160 reported in units of parts per million (ppm; δ) relative to either tetramethylsilane (TMS) as the internal  
161 standard or residual solvent proton. Coupling constant values are reported in hertz. HPLC analysis was  
162 performed using a Water H-Class UPLC system equipped with PDA (Waters) and CAD (Thermo Fisher)  
163 detectors using a Phenomenex Luna 3 μM C18(2) 100Å, 150 x 4.6 mm column using gradients of water  
164 and acetonitrile, each containing 0.1% (v/v) of TFA. The chemical purity of RV lipoglycopeptide derivatives  
165 and telavancin was measured using HPLC-UV and in all cases was > 95%. Telavancin and RV40 were  
166 synthesized as previously described (1).

167 **SYNTHESIS PROCEDURES**

168 **Generic Reductive Amination Procedure**

169 To a reactor vessel containing a stirred solution of DMF (50 mL) and DIPEA (4.0 mmol) at 65 °C was  
170 added vancomycin HCl (2.9 g, 2.0 mmol), and the mixture was stirred for 10 minutes. The mixture was  
171 then cooled to 30 °C at which point the appropriate aldehyde was added (2.8 mmol). The resulting solution  
172 was stirred overnight at which point MeOH (25 mL) and TFA (8 mmol) were added. After stirring for 2  
173 hours, Borane tert-butylamine complex (2.0 mmol) was added portion-wise. After stirring for an additional  
174 2 hours the reaction mixture was then purified using reverse phase C18 column chromatography  
175 (Phenomenex Luna 10 μM PREP C18(2) 250 x 21.2 mm column) using gradients of water and acetonitrile,  
176 each containing 0.1% (v/v) of TFA. In some instances, lactic acid was used instead of TFA to prepare lactic  
177 acid salt former of RV lipoglycopeptides. Fractions were evaluated using HPLC and then pertinent  
178 fractions containing purified RV lipoglycopeptide, DIPEA were pooled together for the isolation of the product via  
179 lyophilization. In general, the target RV lipoglycopeptides were obtained as white solids in modest yield  
180 (typically 30-50%) and high purity (>97% by HPLC-UV).

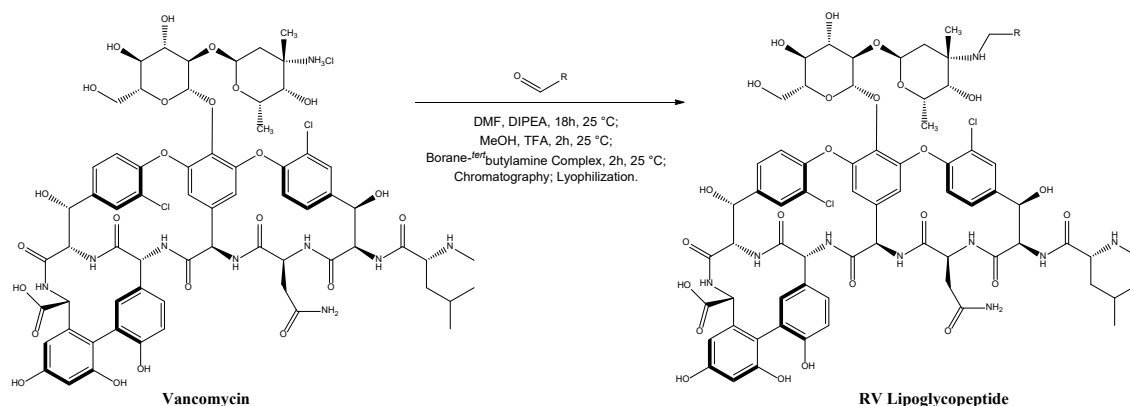

184

185

186 **Generic aldehyde preparation**

187 To a reactor equipped with a stir bar was added an alcohol reagent, containing an ester or amide bond  
188 and a suitable organic solvent (typically DCM or THF). The reaction mixture was stirred for approximately  
189 5 minutes to fully dissolve the starting material at which point sodium bicarbonate and Dess-Martin  
190 periodinane were added to the reaction mixture. The reaction mixture stirred for 2 hours, at which point  
191 TLC analysis was used to assess progress. In the instance that a large amount of unreacted starting  
192 material was present, an additional aliquot of Dess-Martin periodinane was added to the reaction mixture  
193 and progress was re-assessed, after an additional 2 hours of stirring. Once complete, the reaction mixture  
194 was then treated with DCM and a solution of 10% sodium thiosulfate saturated with NaHCO<sub>3</sub> for 90  
195 minutes. The reaction mixture was then extracted with the sodium thiosulfate solutions (3 x 100 mL) and  
196 brine (2 x 100 mL), while retaining the organic layer. The organic layer was dried over Na<sub>2</sub>SO<sub>4</sub>, filtered,  
197 and solvent was removed under reduced pressure, to yield the target aldehyde. The final material was  
198 typically used without further purification.

199

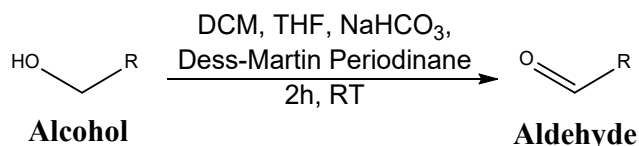

201 **Scheme S2: Generic synthesis scheme depicting an oxidation reaction to prepare an aldehyde**

202

203 **Generic alcohol preparation – Conventional Ester**

204 To a reactor vessel was added 2-iodoethanol, a suitable organic solvent, typically N,N-Dimethylformamide,  
205 and an appropriate carboxylic acid. The reaction mixture was then placed in an incubated shaker set at 40  
206 °C and ~125 rpm where it was left to shake overnight. Solvent was removed under reduced pressure and  
207 the residue was subjected to liquid-liquid extraction using H<sub>2</sub>O (40 mL) and hexanes (3 x 75 mL). Organic  
208 layers were combined, and the solvent was removed under reduced pressure. The crude material was  
209 purified via silica gel flash column chromatography using a gradient method with hexanes and ethyl acetate



210 as the mobile phases. Fractions of interest were combined, and the solvent was removed under reduced  
211 pressure to produce the target compound, typically as a thick oil.

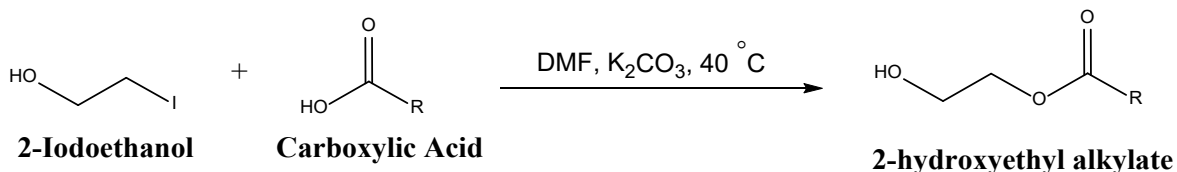

213 **Scheme S3: Generic synthesis scheme depicting preparation of 2-hydroxyethyl alkylates**

214

### 215 **Generic ester preparation – Inverted Ester**

216 To a vial were added: a suitable organic solvent, such as N,N-Dimethylformamide, an appropriate hydroxyl  
217 acid, such as glycolic acid, and an alkyl halide, such as 1-Iododecane. The reaction mixture was then  
218 placed in an incubated shaker set at 40 °C and ~125 rpm where it was left to shake overnight. Solvent was  
219 removed under reduced pressure and the residue was subjected to liquid-liquid extraction using H<sub>2</sub>O (40  
220 mL) and hexanes (3 x 75 ml). Organic layers were combined, and the solvent was removed under reduced  
221 pressure. The crude material was purified via silica gel flash column chromatography using a gradient  
222 method with hexanes and ethyl acetate as the mobile phases. Fractions of interest were combined, and  
223 the solvent was removed under reduced pressure to produce the target compound, typically as a thick oil.

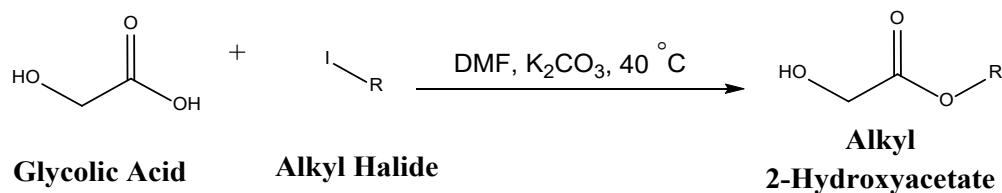

225 **Scheme S4: Generic synthesis scheme depicting preparation of alkyl 2-hydroxyacetates**

226

### 227 **Generic alcohol preparation – Conventional Amide**

228 To a reactor vessel were added ethanolamine and a suitable organic solvent, typically THF or DCM.  
229 Temperature was adjusted to be 0 °C and stirring was initiated. Once the temperature stabilized,  
230 triethylamine was added in a single aliquot. Separately, a solution of an appropriate acid chloride and a  
231 suitable organic solvent, such as THF or DCM, were prepared and loaded into a dosing apparatus. The

232 acid chloride solution was added drop wise over the course of few hours, while stirring at 0 °C. The reaction  
233 mixture was warmed to 25 °C over a two-hour period and the reaction mixture was stirred for approximately  
234 18 hours, at which point stirring was stopped. The reaction mixture was filtered to remove a white  
235 precipitate that had formed. Solvent was removed under reduced pressure to yield a thick, colorless oil.  
236 The crude material was dissolved in EtOAc, and washed with 0.1M HCl, saturated NaHCO<sub>3</sub>, and brine.  
237 The organic layer was dried over Na<sub>2</sub>SO<sub>4</sub>, filtered, and evaporated to dryness, to yield crude product,  
238 typically as a white solid. The crude material was purified using prep-HPLC with a CN column and an  
239 isocratic method with 10% isopropyl alcohol as the mobile phase. Pure fractions were combined, and  
240 solvent was removed to yield the target compound, typically as a white solid.

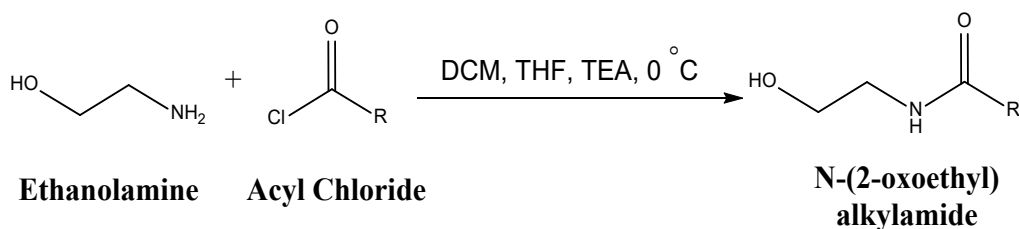

242 **Scheme S5: Generic synthesis scheme depicting preparation of N-(2-oxoethyl)-alkylamides**

243

#### 244 **Generic alcohol preparation – Inverted Amide**

245 To a reactor equipped with temperature control, overhead stirring, and a reflux condenser was added  
246 glycolic acid, toluene, and the appropriate alkyl amine. Stirring was initiated and the reaction mixture was  
247 refluxed overnight. The reaction mixture was evaporated to dryness to yield crude product, typically as a  
248 dense yellow powder. To remove excess glycolic acid a 100 mg/mL solution of crude material in H<sub>2</sub>O was  
249 prepared and stirred at 40 °C for 60 minutes, at which point undissolved material was collected via vacuum  
250 filtration using a fine fritted filter funnel (Chemglass®, CG-1402-12). The collected solids were then dried  
251 overnight in a vacuum oven to yield the target product, typically as a white solid.

252

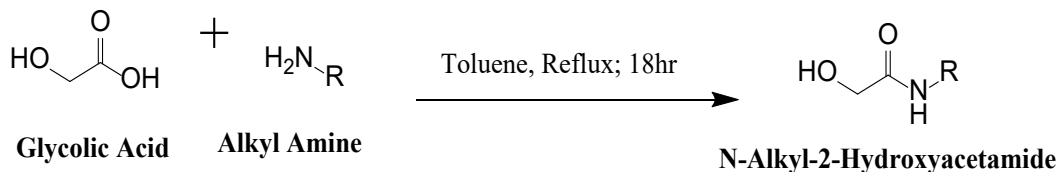

255 **REPRESENTATIVE PREPARATION OF A CONVENTIONAL ESTER – RV65**

256

257 **2-hydroxyethyl dodecanoate**

258 To a reactor vessel was added N-Dimethylformamide (5 mL, 5 Vols), Triethylamine (1.7 mL, 12 mmol, 2.5  
 259 equiv.), Lauric acid (1g, 5.0 mmol, 1.0 equiv.) and 2-iodoethanol (880  $\mu$ L, 10 mmol, 2.0 equiv.). The  
 260 reaction mixture was then placed in an incubated shaker set at 40 °C and ~125 rpm where it was left to  
 261 shake overnight. Solvent was removed under reduced pressure and the residue was subjected to liquid-  
 262 liquid extraction using H<sub>2</sub>O (40 mL) and hexanes (3x75 mL). Organic layers were combined, and the  
 263 solvent was removed under reduced pressure. The crude material was purified via silica gel flash column  
 264 chromatography using a gradient method with hexanes and ethyl acetate as the mobile phases. Fractions  
 265 of interest were combined, and the solvent was removed under reduced pressure to produce the target  
 266 compound, 2-hydroxyethyl dodecanoate as a thick oil.

267

268 <sup>1</sup>H NMR (500 MHz, CDCl<sub>3</sub>)  $\delta$  4.21 – 4.15 (m, 2H), 3.82 – 3.76 (m, 2H), 2.32 (t, *J* = 7.6 Hz, 2H), 1.60 (t, *J* = 7.3 Hz,  
 269 2H), 1.27 – 1.23 (m, 16H), 0.85 (t, *J* = 6.9 Hz, 3H). MS (ESI<sup>+</sup>) calculated for C<sub>14</sub>H<sub>28</sub>O<sub>3</sub> [M+H]<sup>+</sup> *m/z*: 244.2038;  
 270 found: 244.3.

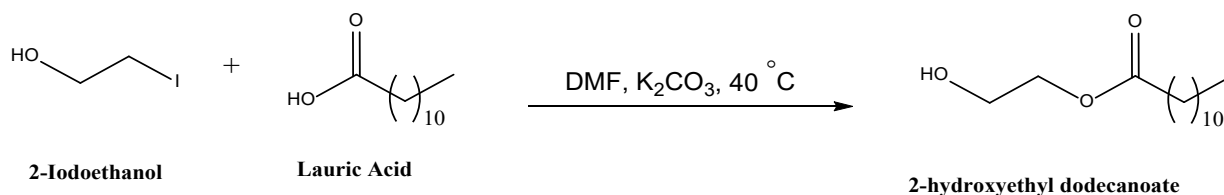

273 **Scheme S7: Synthesis scheme describing the preparation of 2-hydroxyethyl dodecanoate**

275 **2-oxoethyl dodecanoate**

276 To a reaction equipped with a stir bar was added 2-hydroxyethyl dodecanoate (180 mg, 0.75 mmol, 1  
277 equiv.) and Dichloromethane (3.7 mL, 20 Vols.). The reaction mixture was stirred for approximately 5  
278 minutes to fully dissolve the starting material at which point Dess-Martin periodinane (640 mg, 1.5 mmol  
279 2.0 equiv.) was added to the reaction mixture. The mixture was allowed to stir for two hours at which point  
280 the reaction mixture was treated with a solution of 10% sodium thiosulfate saturated with NaHCO<sub>3</sub> for 90  
281 minutes. The reaction mixture was then extracted with the sodium thiosulfate solutions (3 x 100 mL) and  
282 brine (2 x 100 mL), while retaining the organic layer. The organic layer was dried over Na<sub>2</sub>SO<sub>4</sub>, filtered,  
283 and solvent was removed under reduced pressure to yield the target product, 2-oxoethyl dodecanoate as  
284 an off-white solid. The final material was typically used without further purification; typically on the day of  
285 preparation.

286

287

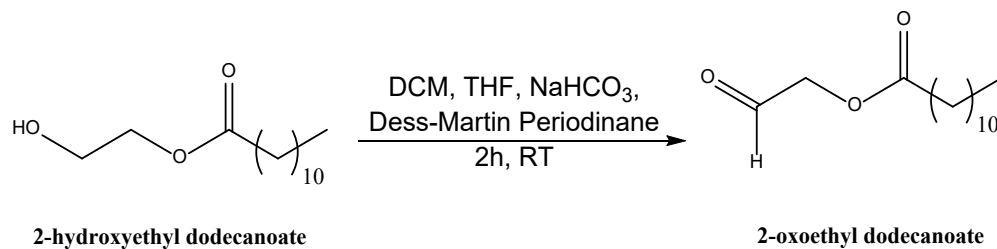

289

290

291

**Scheme S8: Synthesis scheme describing the preparation of 2-oxoethyl dodecanoate**

292 **RV65**

293 To a stirred solution of DMF (20 mL) and DIPEA (240 μL, 1.4 mmol, 2.0 equiv.) at 65 °C was added  
294 vancomycin HCl (1.0 g, 690 μmol) and the mixture was stirred for 10 minutes. The mixture was then cooled  
295 to 30 °C at which point 2-oxoethyl dodecanoate was added (250 mg, 1.0 mmol, 1.5 equiv.). The resulting  
296 solution was stirred overnight at which point MeOH (10 mL) and TFA (210 μL, 7.8 mmol, 4 equiv.) were  
297 added. After stirring for 2 hours, Borane tert-butylamine complex (60 mg, 69 μmol, 1.0 equiv.) was added  
298 portion-wise. After stirring for an additional 2 hours the reaction mixture was then purified using reverse

299 phase C18 column chromatography (Phenomenex Luna 10  $\mu$ M PREP C18(2) 250 x 21.2 mm column)  
300 using gradients of water and acetonitrile, each containing 0.1% (v/v) of TFA. In some instances, lactic acid  
301 was used instead of TFA to prepare lactic acid salt former of RV lipoglycopeptides. Fractions were  
302 evaluated using HPLC and then pertinent fractions containing purified RV65 were pooled together for  
303 removal of solvent via lyophilization. The target compound, RV65 (148 mg, 88  $\mu$ mol, 13% overall yield),  
304 was obtained as a white solid in >97% purity (by HPLC).

305

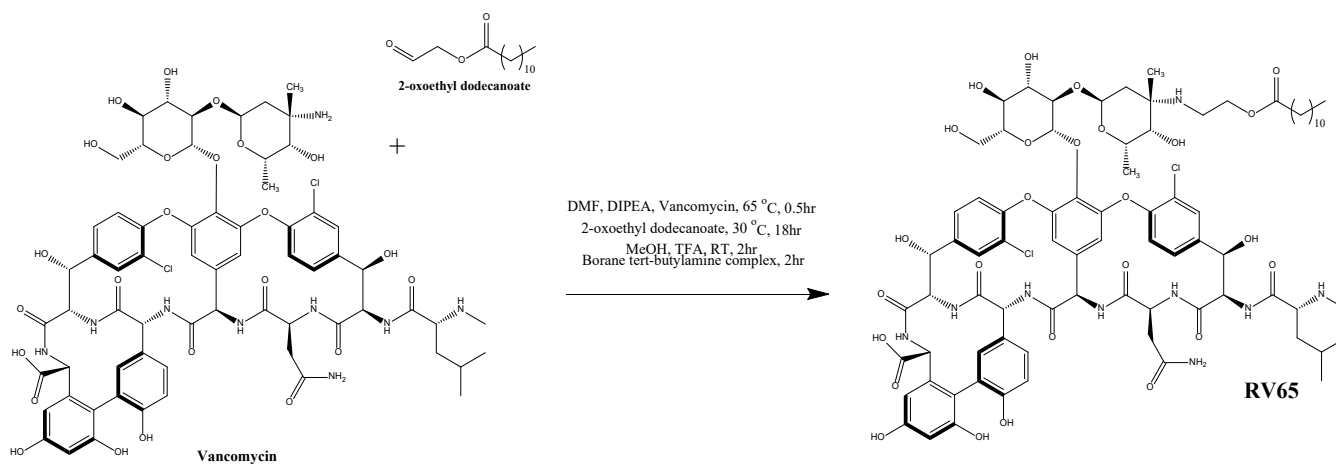

## 308 REPRESENTATIVE PREPARATION OF AN INVERTED ESTER – RV55

### 309 Decyl 2-Hydroxyacetate

310 To a reactor vessel was added DMF (4.1 mL, 25 Vols.), K<sub>2</sub>CO<sub>3</sub> (740 mg, 5.3 mmol, 2.5 equiv.), glycolic  
311 acid (163 mg, 2.1 mmol, 1.0 equiv. and 1-iododecane (630 mg, 2.3 mmol, 1.1 equiv.). The reaction mixture  
312 was then placed in an incubated shaker set at 40 °C and ~125 rpm where it was left to shake overnight.  
313 Solvent was removed under reduced pressure and the residue was subjected to liquid-liquid extraction  
314 using H<sub>2</sub>O (40 mL) and hexanes (3 x 75 mL). Organic layers were combined, and the solvent was removed  
315 under reduced pressure. The crude material was purified via silica gel flash column chromatography using  
316 a gradient method with hexanes and ethyl acetate as the mobile phases. Fractions of interest were  
317 combined, and the solvent was removed under reduced pressure to produce the target compound, Decyl-  
318 2-Hydroxyacetate (140 mg, 650 μmol, 30% overall yield) as a thick oil.

319

320 <sup>1</sup>H NMR (500 MHz, CDCl<sub>3</sub>) δ 4.18 (t, *J* = 6.8 Hz, 2H), 4.14 (s, 2H), 2.57 (s, 1H), 1.65 (d, *J* = 7.0 Hz, 2H), 1.31 (dd, *J*  
321 = 19.5, 8.9 Hz, 6H), 1.25 (s, 8H), 0.87 (t, *J* = 6.9 Hz, 3H). MS (ESI<sup>+</sup>) calculated for C<sub>12</sub>H<sub>24</sub>O<sub>3</sub> [M+H]<sup>+</sup> *m/z*: 216.3;  
322 found: 216.2.

323

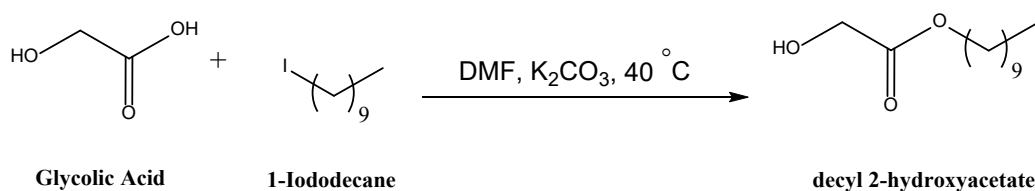

325 **Scheme S10: Synthesis scheme depicting preparation of decyl 2-hydroxyacetate**

326

### 327 Decyl 2-Oxoacetate

328 To a reactor vessel equipped with a stir bar was added decyl 2-hydroxyacetate (140 mg, 647 μmol, 1.0  
329 equiv.), DCM (6 mL, 29 Vols), and THF (10 mL, 10 Vols). The reaction mixture was stirred for approximately  
330 5 minutes to fully dissolve the starting material, at which point Dess-Martin periodinane (1.1 g, 780 μmol,  
331 1.2 equiv.) was added to the reaction mixture. After stirring for 2 hours the solution was then poured into a

332 separatory funnel and the organic layer was isolated, washed with two additional aliquots of 10% sodium  
333 thiosulfate in water saturated with NaHCO<sub>3</sub> (3 x 100 mL), and brine (2 x 100 mL). The organic layer was  
334 then dried over Na<sub>2</sub>SO<sub>4</sub>, filtered, and evaporated to dryness to yield the target compound, Decyl 2-  
335 Oxoacetate, as a yellow tinged solid that was used without further purification; typically on the day of  
336 preparation.

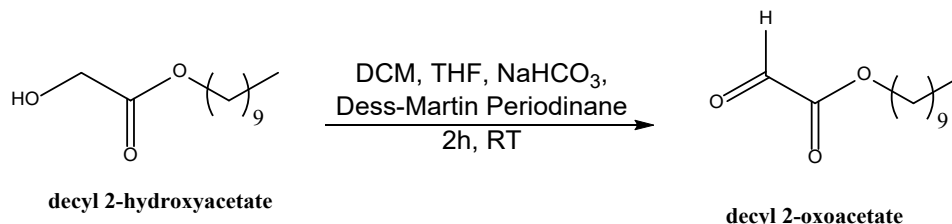

338 **Scheme S11: Synthesis scheme depicting preparation of decyl 2-oxoacetate**

339 **RV55**

340 To a stirred solution of DMF (3 mL) and DIPEA (27  $\mu$ L, 156  $\mu$ mol, 2.0 equiv.) at 65  $^{\circ}$ C was added  
341 vancomycin HCl (113 mg, 78  $\mu$ mol) and the mixture was stirred for 10 minutes. The mixture was then  
342 cooled to 30  $^{\circ}$ C at which point decyl 2-oxoacetate (25 mg, 117  $\mu$ mol, 1.5 equiv.) was added. The resulting  
343 solution was stirred overnight at which point MeOH (3 mL) and TFA (24  $\mu$ L, 310  $\mu$ mol, 4 equiv.) were  
344 added. After stirring for 2 hours, Borane tert-butylamine complex (60 mg, 69  $\mu$ mol, 1.0 equiv.) was added  
345 portion-wise. After stirring for an additional 2 hours the reaction mixture was then purified using reverse  
346 phase C18 column chromatography (Phenomenex Luna 10  $\mu$ M PREP C18(2) 250 x 21.2 mm column)  
347 using gradients of water and acetonitrile, each containing 0.1% (v/v) of TFA. In some instances, lactic acid  
348 was used instead of TFA to prepare lactic acid salt former of RV lipoglycopeptides. Fractions were  
349 evaluated using HPLC and then pertinent fractions containing purified RV65 were pooled together for  
350 removal of solvent via lyophilization. The target compound, RV55 was obtained as a white solid in >97%  
351 purity (by HPLC).

352

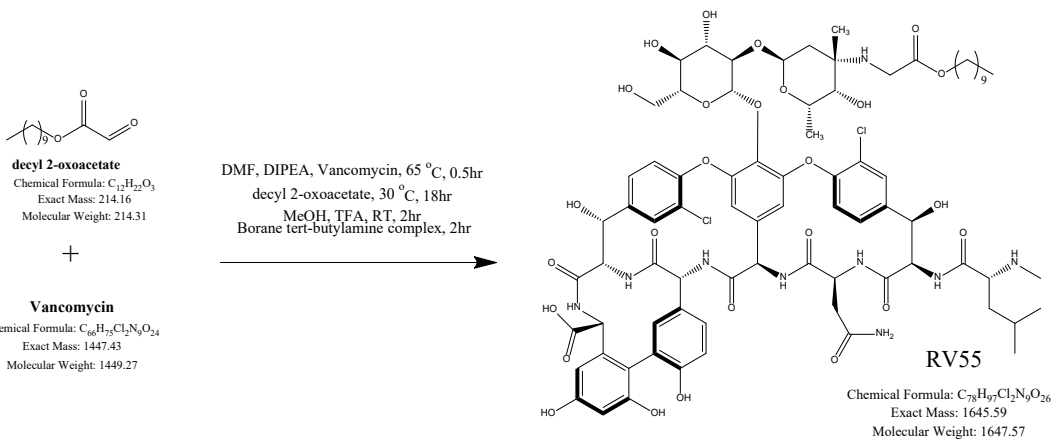

353

354 **Scheme S12: Synthesis scheme depicting preparation of RV55**



355 **REPRESENTATIVE PREPARATION OF A CONVENTIONAL AMIDE – RV62**

356

357 **N-(2-hydroxyethyl)dodecanamide**

358 To a reactor vessel were added ethanolamine (3.5 g, 56.7 mmol, 2.1 equiv.) and THF (150 mL, 25.4 Vols).

359 The temperature was adjusted to be 0 °C and stirring was initiated. Once the temperature stabilized,

360 triethylamine (5.6 mL, 40.5 mmol, 1.5 equiv.) was added in a single aliquot. Separately, a solution of

361 dodecanoyl chloride (6.4 mL, 27.0 mmol, 1 equiv.) and THF (50 mL, 8.5 Vols) was prepared and charged

362 into a dosing apparatus. The dodecanoyl chloride solution was added drop wise over the course of few

363 hours, while stirring at 0 °C. The reaction mixture was warmed to 25 °C over a two-hour period and the

364 reaction mixture was stirred for approximately 18 hours, at which point stirring was stopped. The reaction

365 mixture was filtered to remove a white precipitate that had formed. Solvent was removed under reduced

366 pressure to yield a thick, colorless oil. The crude material was dissolved in EtOAc (300 mL) and washed

367 with 0.1M HCl (3 x 100 mL), saturated NaHCO<sub>3</sub> (3 x 100 mL), and brine (3 x 100 mL). The organic layer

368 was dried over Na<sub>2</sub>SO<sub>4</sub>, filtered, and evaporated to dryness to yield the target compound, N-(2-

369 hydroxyethyl)decanamide (3.2 g, 12.9 mmol, 48% overall yield) as a white solid. The crude material was

370 purified using prep-HPLC with a CN column and an isocratic method with 10% isopropyl alcohol as the

371 mobile phase. Pure fractions were combined, and solvent was removed to yield the target compound, N-

372 (2-hydroxyethyl)decanamide (3.2 g, 12.9 mmol, 48% overall yield) as a white solid.

373

374 <sup>1</sup>H NMR (500 MHz, CDCl<sub>3</sub>) δ 6.13 (s, 1H), 3.73 – 3.68 (m, 2H), 3.41 (q, *J* = 5.4 Hz, 2H), 2.92 (s, 1H), 2.23 – 2.16 (m,

375 2H), 1.62 (t, *J* = 6.4 Hz, 3H), 1.28 - 1.24 (m, 16H), 0.87 (t, *J* = 6.9 Hz, 3H). <sup>13</sup>C NMR (126 MHz, CDCl<sub>3</sub>) δ 174.62,

376 62.45, 42.48, 36.76, 31.91, 29.62, 29.50, 29.37, 29.34, 29.31, 29.16, 25.75, 22.69, 14.12. MS (ESI<sup>+</sup>) calculated for

377 C<sub>14</sub>H<sub>29</sub>NO<sub>2</sub> [M+H]<sup>+</sup> *m/z*: 243.2198; found: 243.219.

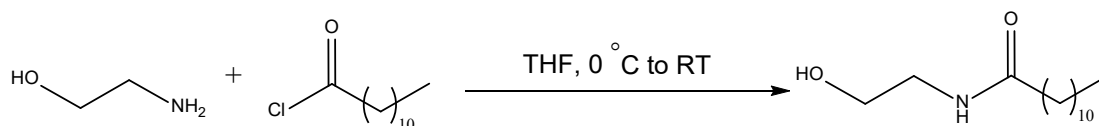

379 **Scheme S13: Synthesis scheme depicting preparation of N-(2-hydroxyethyl)dodecanamide**

380 **N-(2-oxoethyl)dodecanamide**

381 To a reactor vessel equipped with a stir bar was added N-(2-hydroxyethyl)dodecanamide (1.0 g, 4.1 mmol,  
382 1.0 equiv.), DCM (20 mL, 20 Vols), and THF (10 mL, 10 Vols). The reaction mixture was stirred for  
383 approximately 5 minutes to fully dissolve the starting material, at which point NaHCO<sub>3</sub> (690 mg, 8.2 mmol,  
384 2.0 equiv.) and Dess-Martin periodinane (2.2 g, 5.1 mmol, 1.3 equiv.) were added to the reaction mixture.  
385 After stirring for 2 hours the solution was then poured into a separatory funnel and the organic layer was  
386 isolated, washed with two additional aliquots of 10% sodium thiosulfate in water saturated with NaHCO<sub>3</sub>  
387 (3 x 100 mL), and brine (2 x 100 mL). The organic layer was then dried over Na<sub>2</sub>SO<sub>4</sub>, filtered, and  
388 evaporated to dryness to yield the target compound, N-(2-oxoethyl)dodecanamide (673 mg, 2.8 mmol,  
389 67% overall yield), as a yellow tinged solid that was used without further purification; typically on the day  
390 of preparation.

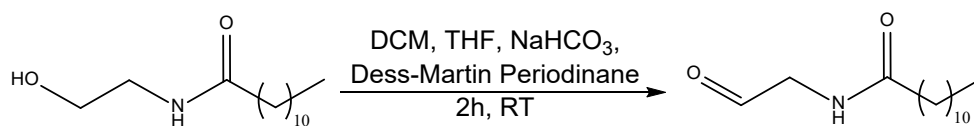

392 **Scheme S14: Synthesis scheme depicting preparation of N-(2-oxoethyl)dodecanamide**

393 **Preparation of RV62**

394 To a stirred solution of DMF (50 mL) and DIPEA (694 μL, 4.0 mmol) at 65 °C was added vancomycin HCl  
395 (2.9 g, 2.0 mmol) and the mixture was stirred for 10 minutes. The mixture was then cooled to 30 °C at  
396 which point N-(2-oxoethyl)dodecanamide was added (673 mg, 2.8 mmol). The resulting solution was  
397 stirred overnight at which point MeOH (25 mL) and TFA (610 μL, 8.0 mmol) were added. After stirring for  
398 2 hours, Borane tert-butylamine complex (173 mg, 2.0 mmol) was added portion-wise. After stirring for an  
399 additional 2 hours the reaction mixture was then purified using reverse phase C18 column chromatography  
400 (Phenomenex Luna 10 μM PREP C18(2) 250 x 21.2 mm column) using gradients of water and acetonitrile,  
401 each containing 0.1% (v/v) of TFA. In some instances, lactic acid was used instead of TFA to prepare lactic  
402 acid salt former of RV lipoglycopeptides. Fractions were evaluated using HPLC and then pertinent fractions  
403 containing purified RV62 were pooled together for removal of solvent via lyophilization. The target

404 compound, RV62 (600 mg, 0.35 mmol, 18% overall yield), was obtained as a white solid in >97% purity  
405 (by HPLC).

406

407  $^1\text{H}$  NMR (500 MHz; DMSO- $d_6$ ):  $\delta$  9.40 (s, 1H), 9.13 (s, 1H), 9.05 (s, 1H), 8.62 (s, 1H), 8.49 (d,  $J$  = 5.7 Hz,  
408 1H), 8.24 (s, 1H), 8.00 (t,  $J$  = 5.6 Hz, 1H), 7.84 (d,  $J$  = 1.9 Hz, 1H), 7.51 (dd,  $J$  = 8.5, 1.8 Hz, 1H), 7.46 (dd,  
409  $J$  = 8.2, 1.9 Hz, 1H), 7.40 (s, 1H), 7.35 (s, 1H), 7.31 (d,  $J$  = 8.3 Hz, 1H), 7.24 (d,  $J$  = 8.4 Hz, 1H), 7.18 (s,  
410 1H), 6.91 (s, 1H), 6.78 (d,  $J$  = 8.4 Hz, 1H), 6.71 (d,  $J$  = 8.4 Hz, 1H), 6.66 (d,  $J$  = 11.7 Hz, 1H), 6.39 (d,  $J$  =  
411 2.3 Hz, 1H), 6.26 (d,  $J$  = 2.2 Hz, 1H), 5.93 (s, 1H), 5.79 (s, 1H), 5.74 (d,  $J$  = 8.1 Hz, 1H), 5.59 – 5.55 (m,  
412 1H), 5.31 (dd,  $J$  = 23.1, 5.9 Hz, 2H), 5.21 – 5.17 (m, 1H), 5.16 (s, 1H), 5.11 (s, 1H), 4.90 (s, 1H), 4.64 (q,  
413  $J$  = 6.4 Hz, 1H), 4.45 (s, 1H), 4.44 (d,  $J$  = 5.3 Hz, 1H), 4.33 (s, 1H), 4.23 – 4.15 (m, 2H), 4.08 – 3.98 (m,  
414 4H), 3.69 (d,  $J$  = 11.0 Hz, 2H), 3.61 – 3.43 (m, 4H), 2.85 – 2.80 (m, 1H), 2.76 (s, 1H), 2.40 (s, 3H), 2.18 –  
415 2.10 (m, 2H), 2.06 (t,  $J$  = 7.5 Hz, 2H), 1.92 – 1.86 (m, 1H), 1.81 (d,  $J$  = 13.1 Hz, 1H), 1.70 (hept,  $J$  = 6.7  
416 Hz, 1H), 1.50 – 1.42 (m, 6H), 1.37 (d,  $J$  = 7.1 Hz, 2H), 1.34 – 1.28 (m, 2H), 1.28 – 1.19 (m, 20H), 1.14 (dd,  
417  $J$  = 6.9, 0.8 Hz, 2H), 1.09 (d,  $J$  = 6.4 Hz, 2H), 0.96 – 0.85 (m, 2H), 0.85 (d,  $J$  = 4.5 Hz, 3H).  $^{13}\text{C}$  NMR (126  
418 MHz, DMSO)  $\delta$  179.25, 176.49, 174.03, 173.29, 172.51, 172.26, 171.15, 170.61, 169.43, 169.12, 167.73,  
419 166.91, 158.14, 157.90, 157.16, 156.48, 155.06, 152.14, 151.31, 149.87, 148.27, 142.43, 139.82, 136.12,  
420 135.62, 134.54, 131.78, 128.63, 127.36, 127.08, 126.24, 126.20, 125.48, 124.22, 123.30, 121.58, 118.41,  
421 117.99, 116.21, 116.03, 107.29, 105.74, 104.60, 102.33, 100.89, 96.52, 77.91, 77.00, 76.80, 71.54, 70.20,  
422 69.07, 65.87, 65.65, 63.11, 61.74, 61.20, 58.45, 56.72, 54.85, 53.64, 50.99, 36.03, 35.21, 32.71, 31.24,  
423 28.93, 28.85, 28.69, 28.64, 28.60, 27.09, 24.97, 23.95, 22.65, 22.55, 22.04, 20.49, 20.33, 18.99, 16.90,  
424 16.79, 13.91, 0.00 (TMS). LC-MS (ESI $^+$ ) calculated for  $\text{C}_{80}\text{H}_{102}\text{Cl}_2\text{N}_{10}\text{O}_{25}$   $[\text{M}+\text{H}]^+$   $m/z$ : 1672.6395; found:  
425 1672.638; retention time = 19.2-19.4 minutes.

426

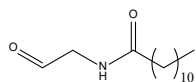

**N-(2-oxoethyl)dodecanamide**

Chemical Formula:  $C_{12}H_{23}NO_2$

Exact Mass: 213.17

Molecular Weight: 213.32

+

**Vancomycin**

Chemical Formula:  $C_{66}H_{75}Cl_2N_9O_{24}$

Exact Mass: 1447.43

Molecular Weight: 1449.27

DMF, DIPEA, Vancomycin, 65 °C, 0.5hr

N-(2-oxoethyl)dodecanamide, 30 °C, 18hr

MeOH, TFA, RT, 2hr

Borane tert-butylamine complex, 2hr

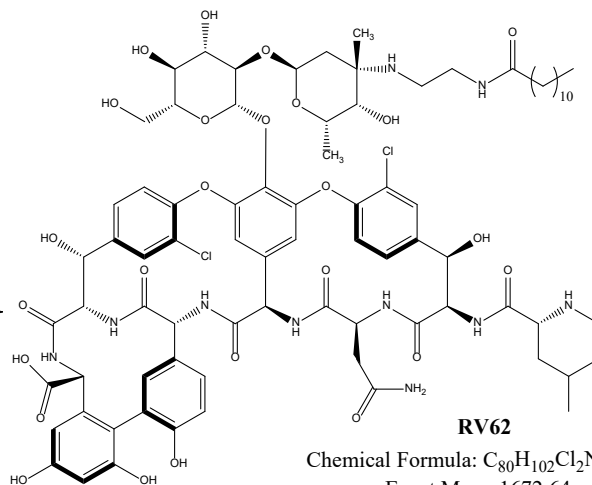

**RV62**

Chemical Formula:  $C_{80}H_{102}Cl_2N_{10}O_{25}$

Exact Mass: 1672.64

Molecular Weight: 1674.64

427

428 **Scheme S15: Synthesis scheme depicting preparation of RV62**

429 **REPRESENTATIVE PREPARATION OF AN INVERTED AMIDE – RV94**

430

431 **N-Decyl-2-Hydroxyacetamide**

432 To a chemical reactor equipped with temperature control, overhead stirring, and a reflux condenser was  
433 added glycolic acid (17.2 g, 227 mmol, 1.4 equiv.), toluene (350 mL, 0.462 M, 11.7 Vols), and N-  
434 Decylamine (30.0 g, 37.2 mL, 162 mmol, 1.0 equiv.). Stirring was initiated at 500 rpm and the reaction  
435 mixture was refluxed overnight. The reaction mixture was then evaporated to dryness to yield crude  
436 product as a dense yellow powder. To remove excess glycolic acid a 100 mg/mL solution of crude material  
437 in H<sub>2</sub>O was prepared and stirred at 40 °C for 60 minutes, at which point undissolved material was collected  
438 via vacuum filtration using a fine fritted filter funnel (ChemGlass, CG-1402-12). The collected solids were  
439 then dried overnight in a vacuum oven to yield the target product, N-Decyl-2-Hydroxyacetamide, as a white  
440 solid in 58.4 % overall yield (23.0 g, 94.5 mmol). <sup>1</sup>H NMR (500 MHz, CDCl<sub>3</sub>) δ 6.76 (s, 1H), 4.03 (s, 2H), 3.26  
441 (q, *J* = 6.7 Hz, 2H), 1.50 (q, *J* = 7.2 Hz, 2H), 1.28 (s, 5H), 1.24 (s, 8H), 0.86 (t, *J* = 7.0 Hz, 3H). <sup>13</sup>C NMR (126 MHz,  
442 CDCl<sub>3</sub>) δ 172.28, 77.41, 77.16, 76.90, 62.13, 39.20, 31.99, 31.70, 29.66, 29.61, 29.42, 29.41, 27.02, 22.79, 14.23.  
443 MS (ESI<sup>+</sup>) calculated for C<sub>12</sub>H<sub>25</sub>NO<sub>2</sub> [M+H]<sup>+</sup> *m/z*: 215.1885; found: 215.189.

444

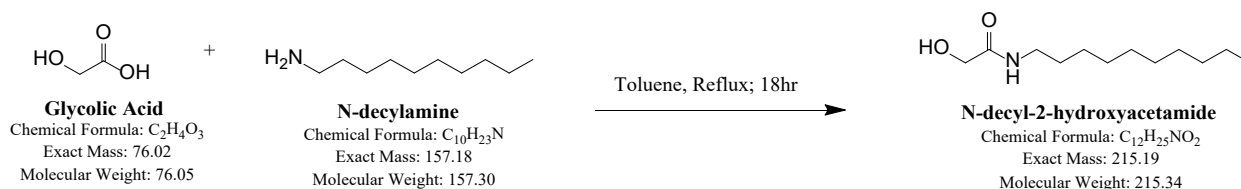

447

448 **N-Decyl-2-Oxoacetamide**

449 To a reactor vessel equipped with temperature control, overhead stirring, and nitrogen purging was added  
450 N-Decyl-2-Hydroxyacetamide (10.6 g, 49.1 mmol, 1.0 equiv.), NaHCO<sub>3</sub> (4.54 g, 54.0 mmol, 1.1 equiv.),  
451 and DCM (264 mL, 25 Vols). Stirring at 400 rpm was initiated and the temperature was set to 5 °C. Once  
452 the alcohol starting material had fully dissolved and the temperature had equilibrated, Dess-Martin  
453 Periodinane (25.0 g, 58.9 mmol, 1.2 equiv.) was added portion-wise to the reaction mixture. The reaction

454 mixture was allowed to stir at 5 °C for 30 minutes. To the reaction mixture was added a solution of 10%  
455 sodium thiosulfate in water saturated with NaHCO<sub>3</sub> (150 mL). The reaction mixture was allowed to stir at  
456 250 rpm and 25 °C for 30 minutes. The solution was then poured into a separatory funnel and the organic  
457 layer was isolated, washed with two additional aliquots of 10% sodium thiosulfate in water saturated with  
458 NaHCO<sub>3</sub> (2 x 150 mL), and brine (1 x 150 mL). The organic layer was then dried over Na<sub>2</sub>SO<sub>4</sub>, filtered, and  
459 evaporated to dryness to yield the target compound, N-Decyl-2-Oxoacetamide (4.6 g, 3.76 mmol, 44%  
460 overall yield), as a yellow tinged solid that was used without further purification; typically on the day of  
461 preparation.

462

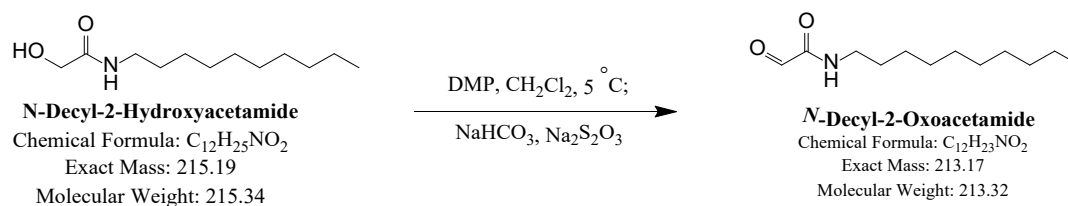

463

464 **Scheme S17: Synthesis scheme depicting preparation of N-Decyl-2-Oxoacetamide**

465 **RV94**

466 To a stirred solution of DMF (225 mL) and DIPEA (3.27 mL, 18.8 mmol) at 65 °C was added vancomycin  
467 HCl (13.6 g, 9.38 mmol) and the mixture was stirred for 10 minutes. The mixture was then cooled to 30 °C  
468 at which point N-Decyl-2-Oxoacetamide was added (2.2 g, 10.3 mmol). The resulting solution was stirred  
469 overnight at which point MeOH (100 mL) and TFA (2.87 mL, 37.5 mmol) were added. After stirring for 2  
470 hours, Borane tert-butylamine complex (815 mg, 9.38 mmol) was added portion-wise. After stirring for an  
471 additional 2 hours the reaction mixture was then purified using reverse phase C18 column chromatography  
472 (Phenomenex Luna 10 μM PREP C18(2) 250 x 21.2 mm column) using gradients of water and acetonitrile,  
473 each containing 0.1% (v/v) of TFA. In some instances, lactic acid was used instead of TFA to prepare lactic  
474 acid salt former of RV lipoglycopeptides. Fractions were evaluated using HPLC and then pertinent  
475 fractions containing purified RV94 were pooled together for removal of solvent via lyophilization. The target  
476 compound, RV94 (6.2 g, 3.76 mmol, 40% overall yield), was obtained as a white solid.

477

478 <sup>1</sup>H NMR (500 MHz; DMSO-d<sub>6</sub>): δ 9.40 (s, 1H), 9.12 (s, 1H), 9.05 (s, 1H), 8.62 (s, 1H), 8.49 (d, *J* = 5.8 Hz,  
479 1H), 8.21 (s, 1H), 8.04 (s, 1H), 7.84 (d, *J* = 1.9 Hz, 1H), 7.51 (dd, *J* = 8.6, 1.7 Hz, 1H), 7.46 (dd, *J* = 8.4,  
480 1.8 Hz, 1H), 7.39 (s, 1H), 7.34 – 7.27 (m, 1H), 7.23 (d, *J* = 8.4 Hz, 1H), 7.18 (d, *J* = 2.3 Hz, 1H), 6.90 (s,  
481 1H), 6.78 (dd, *J* = 8.4, 2.1 Hz, 1H), 6.74 – 6.63 (m, 1H), 6.66 (s, 1H), 6.39 (d, *J* = 2.3 Hz, 1H), 6.26 (d, *J* =  
482 2.2 Hz, 1H), 5.92 (d, *J* = 6.3 Hz, 1H), 5.77 (s, 1H), 5.75 – 5.71 (m, 1H), 5.57 (s, 1H), 5.32 (d, *J* = 7.7 Hz,  
483 1H), 5.23 (s, 1H), 5.19 (d, *J* = 2.0 Hz, 1H), 5.15 (s, 1H), 5.10 (d, *J* = 5.9 Hz, 1H), 5.05 (s, 1H), 4.90 (s, 1H),  
484 4.64 (q, *J* = 6.6 Hz, 1H), 4.44 (t, *J* = 5.9 Hz, 1H), 4.34 (s, 1H), 4.29 – 4.14 (m, 1H), 4.02 (q, *J* = 6.8 Hz, 2H),  
485 3.69 (d, *J* = 11.3 Hz, 2H), 3.61 – 3.49 (m, 2H), 3.45 (s, 2H), 3.15 (s, 1H), 3.06 (q, *J* = 6.6 Hz, 2H), 2.46 –  
486 2.40 (m, 2H), 2.39 (s, 3H), 2.19 – 2.10 (m, 2H), 1.82 (d, *J* = 12.5 Hz, 1H), 1.77 – 1.66 (m, 2H), 1.49 (dq, *J*  
487 = 37.1, 7.0 Hz, 2H), 1.38 (dd, *J* = 8.1, 5.1 Hz, 2H), 1.31 – 1.18 (m, 18H), 1.07 (d, *J* = 6.3 Hz, 2H), 0.93 –  
488 0.85 (m, 2H), 0.85 (d, *J* = 5.0 Hz, 3H). <sup>13</sup>C NMR (126 MHz; DMSO-d<sub>6</sub>): δ 177.68, 176.45, 173.96, 172.44,  
489 172.19, 171.00, 170.55, 169.42, 169.05, 167.80, 167.67, 166.95, 158.00, 157.76, 157.09, 156.41, 154.99,  
490 152.07, 151.22, 149.88, 148.24, 142.30, 139.70, 136.07, 135.54, 134.34, 131.80, 128.57, 127.27, 127.05,  
491 126.21, 126.15, 125.41, 124.15, 123.23, 121.52, 117.92, 116.14, 107.19, 105.69, 104.54, 102.27, 100.93,

492 96.99, 77.73, 76.99, 76.67, 71.49, 71.08, 70.22, 65.83, 65.59, 63.30, 61.69, 61.36, 61.18, 58.35, 56.66,  
493 56.09, 54.78, 53.57, 50.92, 33.57, 32.85, 31.17, 28.84, 28.57, 27.33, 27.03, 26.21, 23.93, 22.66, 22.45,  
494 21.98, 21.66, 20.44, 20.27, 20.18, 17.61, 16.97, 13.85, 0.00 (TMS). LC-MS (ESI<sup>+</sup>) calculated for  
495 C<sub>78</sub>H<sub>98</sub>Cl<sub>2</sub>N<sub>10</sub>O<sub>25</sub> [M+H]<sup>+</sup> *m/z*: 1644.6082; found: 1644.607; retention time = 18.4-18.8 minutes.

496

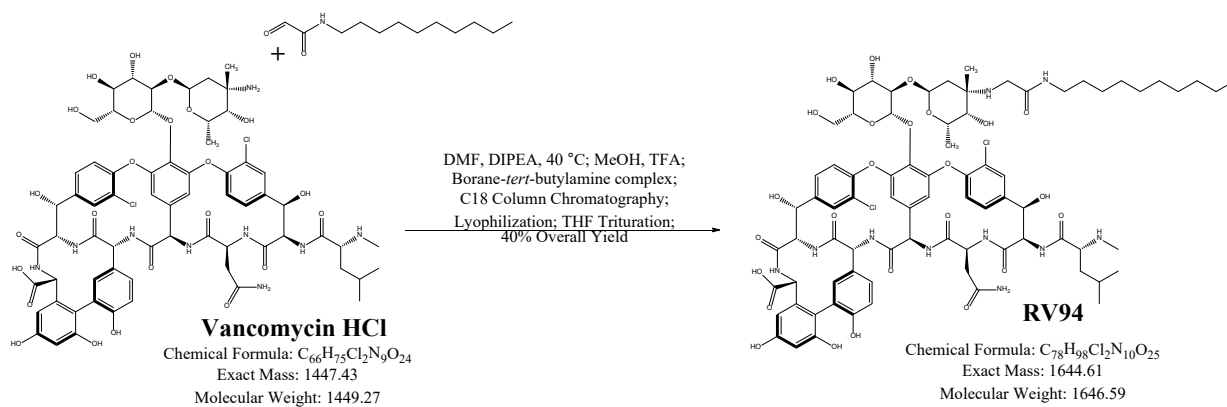

497

498 **Scheme S18: Synthesis scheme depicting preparation of RV94**



499 **PREPARATION OF RV LIPOGLYCOPEPTIDE METABOLITES**

500

501 **RV80**

502 To a stirred solution of DMF (40 mL) and DIPEA (5.0 mmol) at 65 °C was added vancomycin HCl (4.0 g,  
503 2.7 mmol) and the mixture was stirred for 30 minutes. The mixture was then cooled to 30 °C at which point  
504 2-[(tert-butyldimethylsilyl)oxy]acetaldehyde was added (2.8 mmol). The resulting solution was stirred  
505 overnight at which point MeOH (20 mL) and TFA (10 mmol) were added. After stirring for 2 hours, Borane  
506 tert-butylamine complex (2.0 mmol) was added portion-wise. After stirring for an additional 2 hours the  
507 reaction mixture was then purified using reverse phase C18 column chromatography (Phenomenex Luna  
508 10 µM PREP C18(2) 250 x 21.2 mm column) using gradients of water and acetonitrile, each containing  
509 0.1% (v/v) of TFA. Fractions were evaluated using HPLC and then pertinent fractions containing purified  
510 RV80-silyl-ether were pooled together. The RV80-silyl-ether was hydrolyzed during short term storage (4  
511 hours) at room temperature. Crude material was isolated by lyophilization and was then purified using  
512 reverse phase C18 column chromatography (Phenomenex Luna 10 µM PREP C18(2) 250 x 21.2 mm  
513 column) using gradients of water and acetonitrile, each containing 0.1% (v/v) of TFA. Fractions were  
514 evaluated using HPLC and then pertinent fractions containing purified RV80 were pooled together for the  
515 isolation of the product via lyophilization.

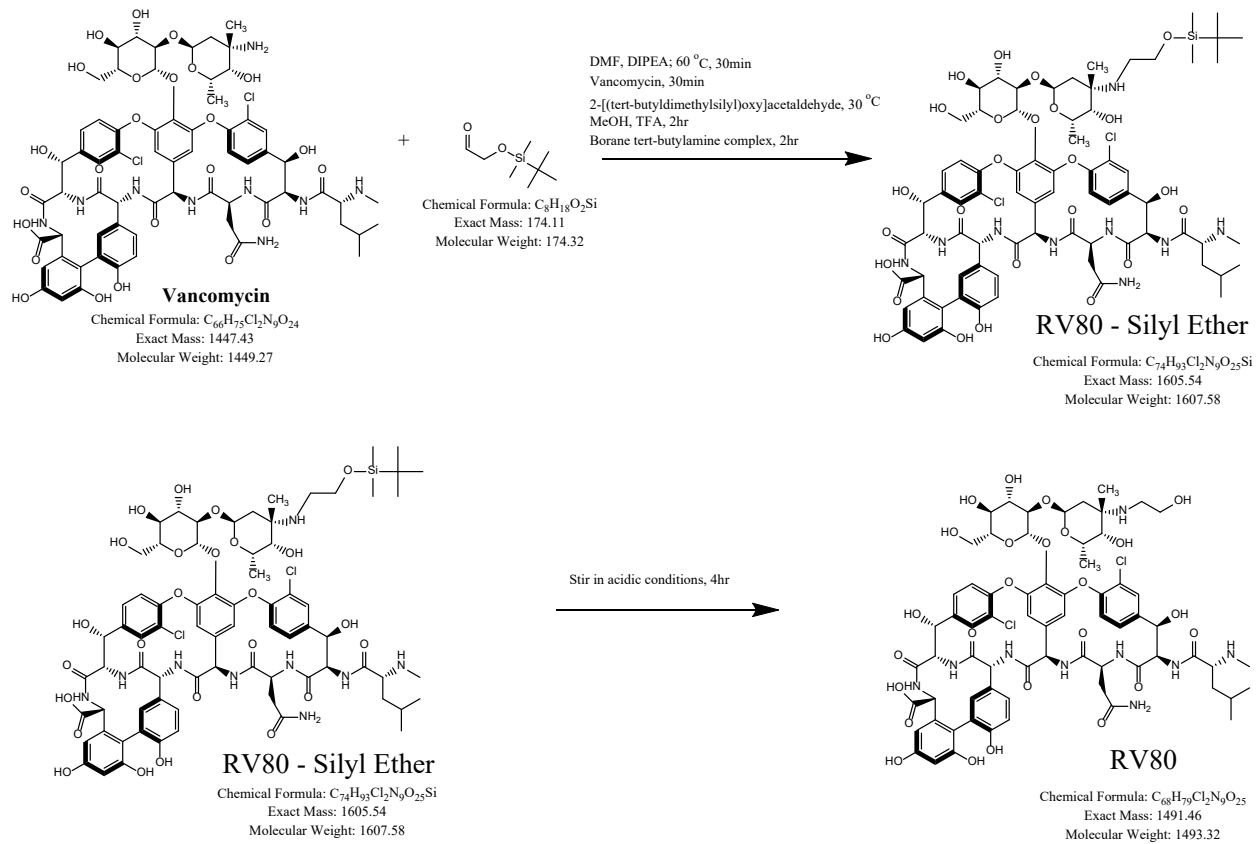

516

517 **Scheme S19: Synthesis scheme depicting preparation of RV80.**

518 **RV82**

519 **Preparation of 9H-fluoren-9-ylmethyl N-(2-oxoethyl)carbamate**

520 To a 400 mL reactor vessel, equipped with pH monitoring, overhead stirring, temperature control, inert  
521 gas, and a dosing apparatus, were added DCM (250 mL) and 9H-fluoren-9-ylmethyl N-(2-  
522 hydroxyethyl)carbamate (3.00 g, 10.6 mmol). The resulting solution was stirred at 25 °C for 30 minutes at  
523 which point the temperature was then reduced to 15 °C and Dess-Martin Periodinane (4.94 g, 11.7 mmol)  
524 was added. The reaction mixture was stirred overnight. The reaction mixture was diluted with DCM (150  
525 mL) and was then washed with a 10% Sodium thiosulfate solution saturated with sodium bicarbonate (2 x  
526 400mL), saturated sodium bicarbonate (2 x 400mL), and brine (1 x 400). The organic layer was then dried  
527 over anhydrous sodium sulfate, filtered, and evaporated to dryness to yield the target compound (500mg,  
528 1.78mmol, 16.8 % yield) as a white solid that was used without further purification.

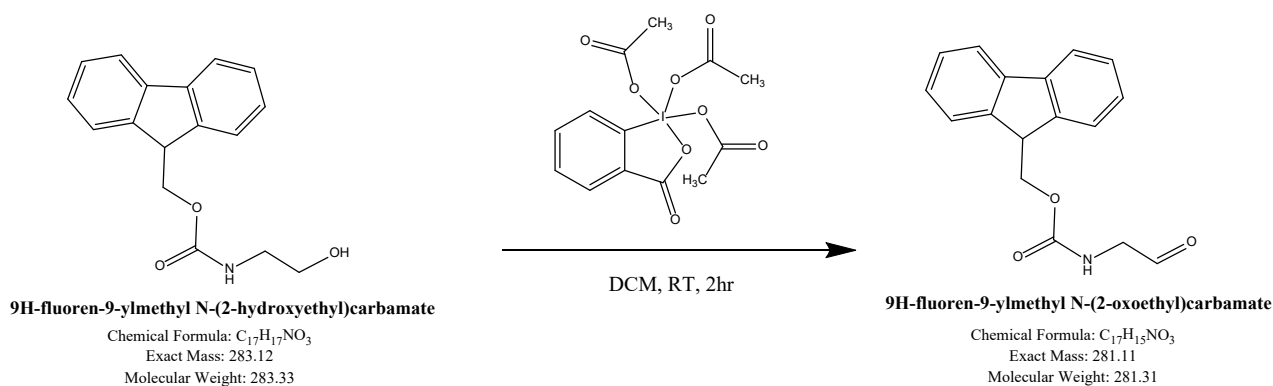

530 **Scheme S20: Synthesis scheme depicting preparation of 9H-fluoren-9-ylmethyl N-(2-oxoethyl)carbamate**

531 **Preparation of RV82-FMOC**

532 To a stirred solution of DMF (225 mL) and DIPEA (16.6 mmol) at 65 °C was added vancomycin HCl (12.0  
533 g, 8.28 mmol) and the mixture was stirred for 30 minutes. The mixture was then cooled to 30 °C at which  
534 point 9H-fluoren-9-ylmethyl N-(2-oxoethyl)carbamate (2.33 g, 8.28 mmol) was added. The resulting  
535 solution was stirred overnight at which point MeOH (125 mL) and TFA (33.1 mmol) were added. After  
536 stirring for 2 hours, Borane tert-butylamine complex (8.28 mmol) was added portion-wise. After stirring for  
537 an additional 2 hours the reaction mixture was then purified using reverse phase C18 column  
538 chromatography (Phenomenex Luna 10 μM PREP C18(2) 250 x 21.2 mm column) using gradients of water

539 and acetonitrile, each containing 0.1% (v/v) of TFA. Fractions were evaluated using HPLC and then  
540 pertinent fractions containing purified RV82-FMOC were pooled together for the isolation of the product  
541 via lyophilization. The target compound, RV82-FMOC was obtained as a white solid (500mg, 0.28 mmol,  
542 16.4 % yield) in >98% purity (HPLC).

543

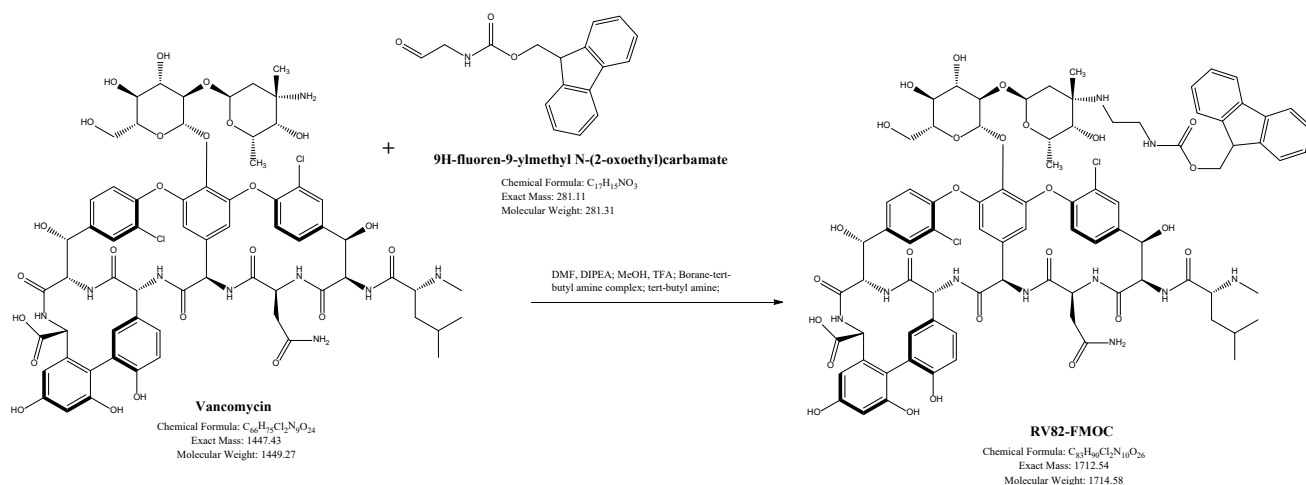

544

545 **Scheme S21: Synthesis scheme depicting preparation of RV82-FMOC**

546 **Preparation of RV82.**

547 To a slurry of purified RV82-FMOC (400 mg, 0.233 mmol) in MeCN (100 mL) was added piperidine (2.33  
548 mmol) and the reaction mixture was stirred for 4 hours at room temperature. Crude material was purified  
549 via Flash Column chromatography (Biotage HP-Sphere C18 25  $\mu$ M, SNAP Ultra 120g column) using  
550 gradients of water and acetonitrile, each containing 0.1% (v/v) of Lactic Acid as the mobile phases.  
551 Collected fractions were evaluated using HPLC, and pertinent fractions containing RV82 were pooled  
552 together for the isolation of the product via lyophilization. The target compound, RV82 was obtained as a  
553 white solid (240 mg, 0.161 mmol, 69 % yield) in >98% purity (HPLC).

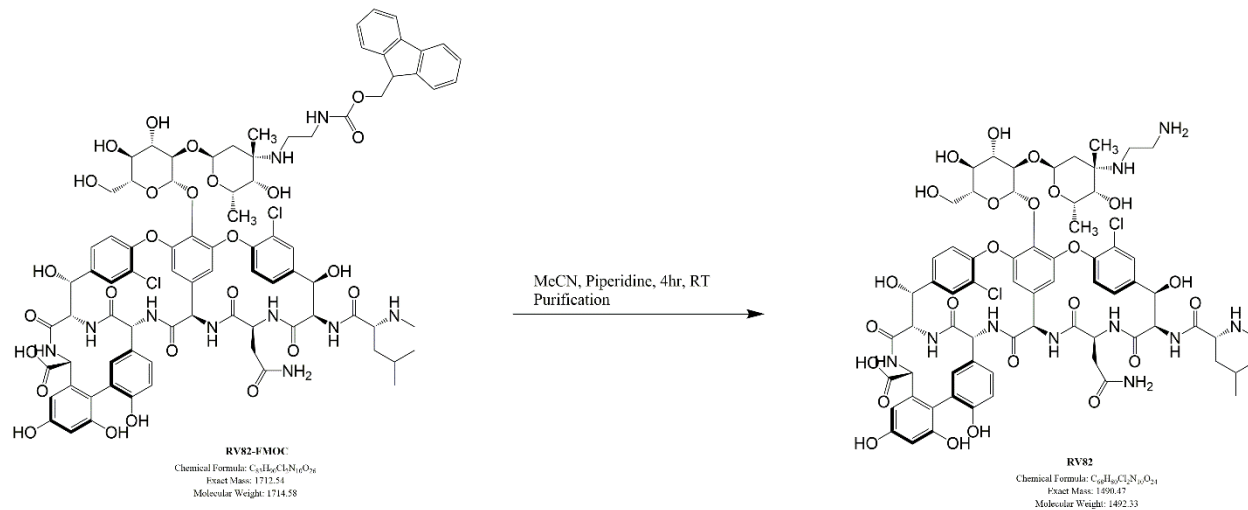

554

555 **Scheme S22: Synthesis scheme depicting preparation of RV82.**

556 **RV101**

557 To a solution of 30% MeCN in H<sub>2</sub>O containing 0.1% TFA v/v (15 mL) at 35 °C was added RV94 (350 mg)  
558 via portion-wise addition. The colorless solution was stirred, and the pH was adjusted to 10 via addition of  
559 NaOH. The reaction was allowed to stir overnight at 35 °C at which point the reaction mixture was purified  
560 using Flash Column chromatography (Biotage HP-Sphere C18 25 uM, SNAP Ultra 120g column) using  
561 gradients of water and acetonitrile, each containing 0.1% (v/v) of Lactic Acid, as the mobile phases.  
562 Fractions were evaluated using HPLC, and then pertinent fractions containing RV101 were pooled together  
563 for the isolation of the product via lyophilization. The target compound, RV101 was obtained as a yellow  
564 solid (210mg, 0.139 mmol, 65.5 % yield) in >98% purity (by HPLC).

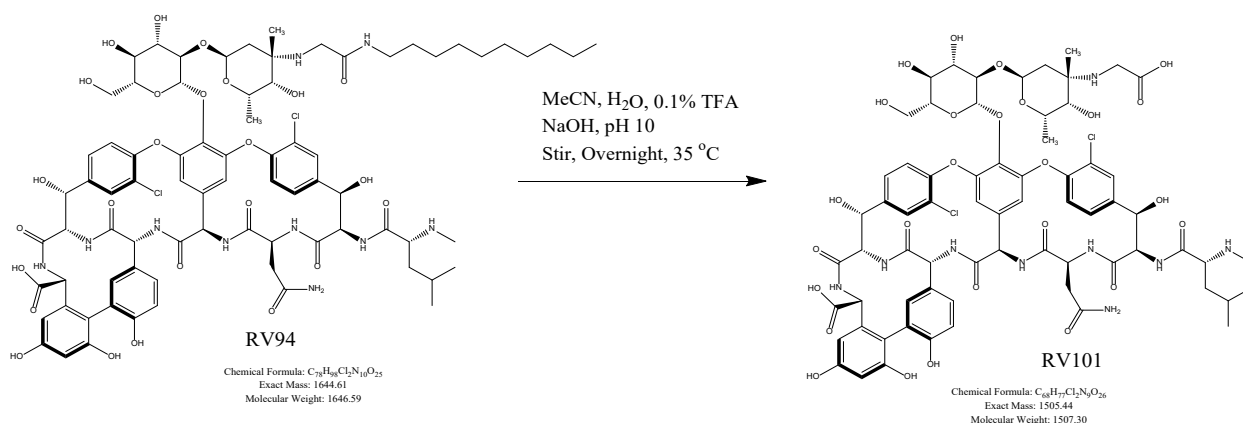

565

566 **Scheme S23: Synthesis scheme depicting preparation of RV101.**

567 **PREPARATION OF RV LIPOGLYCOPEPTIDE COMPARATORS**

568 **RV40**

569 To a stirred solution of DMF (250 mL) at 60 °C was added DIPEA (5.9 mL, 34 mmol) and vancomycin HCl  
570 (25.2 g, 17 mmol) and the mixture was stirred for 10 minutes. The mixture was then cooled to 30 °C at  
571 which point a solution of N-Fmoc-N-Decylaminoacetaldehyde (8.5 g, 20 mmol) dissolved in DMF (20 mL)  
572 was added. The resulting solution was stirred overnight at which point sodium cyanoborohydride (3.2 g,  
573 51 mmol) was added and the mixture was allowed to stir for 5 minutes prior to addition of TFA (3.9 mL, 51  
574 mmol) dissolved in MeOH (250 mL). The reaction mixture was stirred for one hour at which point methanol  
575 was removed under reduced pressure. To the concentrated solution was then added piperidine (8.3 mL,  
576 84 mmol) and the reaction mixture was stirred for an additional hour. The reaction mixture was then purified  
577 using reverse phase C18 column chromatography (Phenomenex Luna 10 µM PREP C18(2) 250 x 21.2  
578 mm column) using gradients of water and acetonitrile, each containing 0.1% (v/v) of TFA. In some  
579 instances, lactic acid was used instead of TFA to prepare lactic acid salt former of RV40. Fractions were  
580 evaluated using HPLC and then pertinent fractions containing purified RV40 were pooled together and  
581 lyophilized to yield the target product, RV40 (8.2 g, 5.0 mmol, 25% overall yield) as a fluffy white solid.

582

583 <sup>1</sup>H NMR (500 MHz, DMSO) δ

584 9.40 (s, 1H), 9.06 (s, 1H), 8.61 (s, 1H), 8.48 (d, *J* = 5.8 Hz), 8.21 (s, 1H), 7.96 (s, 1H), 7.83 (s, 1H), 7.51  
585 (dd, *J* = 8.6, 1.7 Hz, 1H), 7.45 (dd, *J* = 8.4, 1.8 Hz, 1H), 7.38 (s, 1H), 7.33 (s, 1H), 7.29 – 7.27 (m, 1H),  
586 7.23 (d, *J* = 8.4 Hz, 1H), 7.18 (d, *J* = 8.4 Hz, 1H), 6.88 (s, 1H), 6.78 (dd, *J* = 8.4, 2.1 Hz, 1H), 6.69 (dd, *J* =  
587 8.4, 2.1 Hz, 1H), 6.4 (m, 1H), 6.16 (m, 1H), 5.92 (s, 1H), 5.74 (d, *J* = 8.1 Hz, 1H), 5.56 (s, 1H), 5.33 (d, *J* =  
588 7.7 Hz, 1H), 5.23 (d, *J* = 4.0 Hz, 1H), 5.19 (d, *J* = 2.1 Hz, 1H), 5.15 (d, *J* = 4.3 Hz, 1H), 5.10 (s, 1H), 4.88  
589 (s, 1H), 4.64 (q, *J* = 6.5 Hz, 1H), 4.44 (t, *J* = 6.4 Hz, 1H), 4.35 (s, 1H), 4.18 (dq, *J* = 17.2, 7.3, 6.9 Hz, 2H),  
590 4.00 (q, *J* = 6.9 Hz, 2H), 3.69 (d, *J* = 10.8 Hz, 2H), 3.61 – 3.49 (m, 4H), 3.45 (t, *J* = 8.8 Hz, 2H), 3.30 – 3.18  
591 (m, 2H), 3.21 (m, 2H), 2.84 (d, *J* = 6.2 Hz, 2H), 2.75 – 2.68 (m, 4H), 2.37 (s, 2H), 2.14 (m, 1H), 1.70 (h, *J*  
592 = 6.0, 5.1 Hz, 2H), 1.53 (m, 2H), 1.49 (s, 2H), 1.43 (dt, *J* = 14.0, 7.2 Hz, 2H), 1.36 (d, *J* = 7.1 Hz, 2H), 1.28  
593 (dd, *J* = 6.9, 1.7 Hz, 3H), 1.26 – 1.19 (m, 12H), 1.08 (d, *J* = 6.3 Hz, 2H), 0.90 (d, *J* = 6.6 Hz, 2H), 0.88 –

594 0.84 (m, 3H). <sup>13</sup>C NMR (126 MHz, DMSO) δ 176.75, 173.98, 172.79, 172.56, 172.25, 170.94, 170.59,  
 595 169.45, 169.05, 167.65, 166.98, 158.10, 157.86, 157.08, 156.40, 154.99, 152.07, 151.26, 149.85, 148.26,  
 596 142.29, 139.69, 136.16, 135.61, 134.33, 131.80, 128.54, 127.23, 127.23, 127.03, 126.19, 126.14, 124.08,  
 597 123.25, 121.54, 118.33, 117.92, 115.95, 106.93, 106.03, 105.40, 104.50, 102.51, 102.12, 100.86, 97.09,  
 598 77.81, 77.16, 76.83, 71.48, 71.05, 70.37, 66.24, 65.63, 63.45, 63.11, 61.89, 61.49, 61.19, 58.35, 56.67,  
 599 55.43, 54.83, 53.47, 50.84, 47.19, 45.82, 36.47, 31.17, 28.79, 28.55, 26.38, 26.03, 24.17, 23.68, 22.51,  
 600 22.49, 21.98, 20.49, 17.10, 13.91, 0.00 (TMS). LC-MS (ESI<sup>+</sup>) calculated for C<sub>78</sub>H<sub>100</sub>Cl<sub>2</sub>N<sub>10</sub>O<sub>24</sub> [M+H]<sup>+</sup> m/z:  
 601 1630.6289; found: 1630.630; retention time = 17.9 minutes.

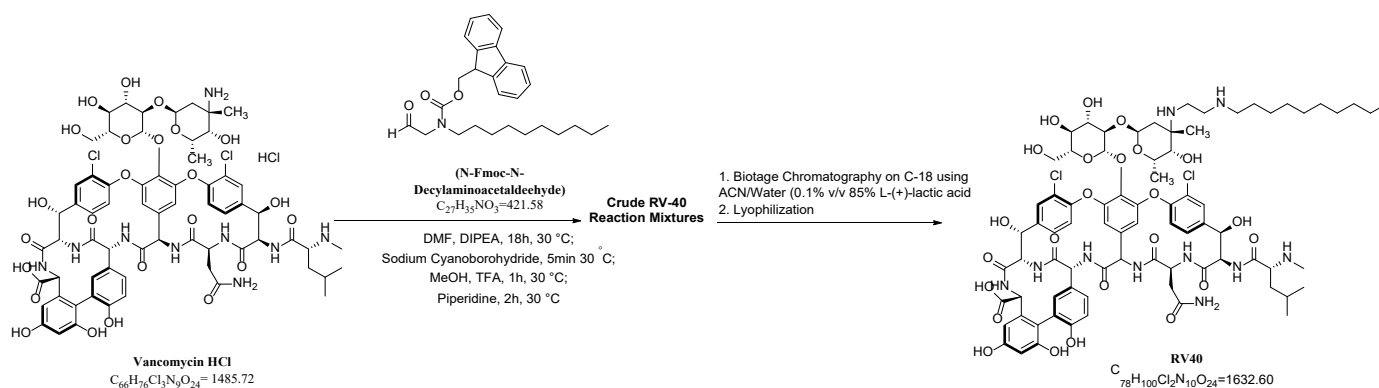

**Scheme S24: Synthesis of RV40**



604 **Telavancin (TLV)**

605 To a reactor vessel equipped with overhead stirring, temperature control, and nitrogen purging was  
606 added H<sub>2</sub>O (12 mL), acetonitrile (48 mL), and DIPEA (0.64 mL, 2.7 mmol, 20 equiv.). The reaction  
607 temperature was reduced to 0 °C at which point Aminomethylphosphonic acid (250 mg, 2.2 mmol, 12  
608 equiv.) and a 37% formaldehyde solution (25 µL, 920 µmol, 5 equiv.) were added. The reaction mixture  
609 was allowed to stir for 60 minutes at which point RV40 (300 mg, 180 µmol, 1 equiv.) was added to the  
610 reaction mixture. The reaction mixture was allowed to stir overnight at which point acetonitrile (150 mL)  
611 was added to induce precipitation. The crude product was isolated via vacuum filtration and was purified  
612 using reverse phase C18 column chromatography (Phenomenex Luna 10 µM PREP C18(2) 250 x 21.2  
613 mm column) using gradients of water and acetonitrile, each containing 0.1% (v/v) of TFA. Fractions were  
614 evaluated using HPLC and then pertinent fractions containing purified TLV were pooled together and  
615 lyophilized to yield the target product, TLV (180 mg, 100 mmol, 57% overall yield) as a fluffy white solid.  
616  
617 LC-MS (ESI<sup>+</sup>) calculated for C<sub>80</sub>H<sub>106</sub>Cl<sub>2</sub>N<sub>11</sub>O<sub>27</sub>P [M+H]<sup>+</sup> *m/z*: 1753.6374; found: 1753.637; retention time =  
618 13.3 minutes.

619

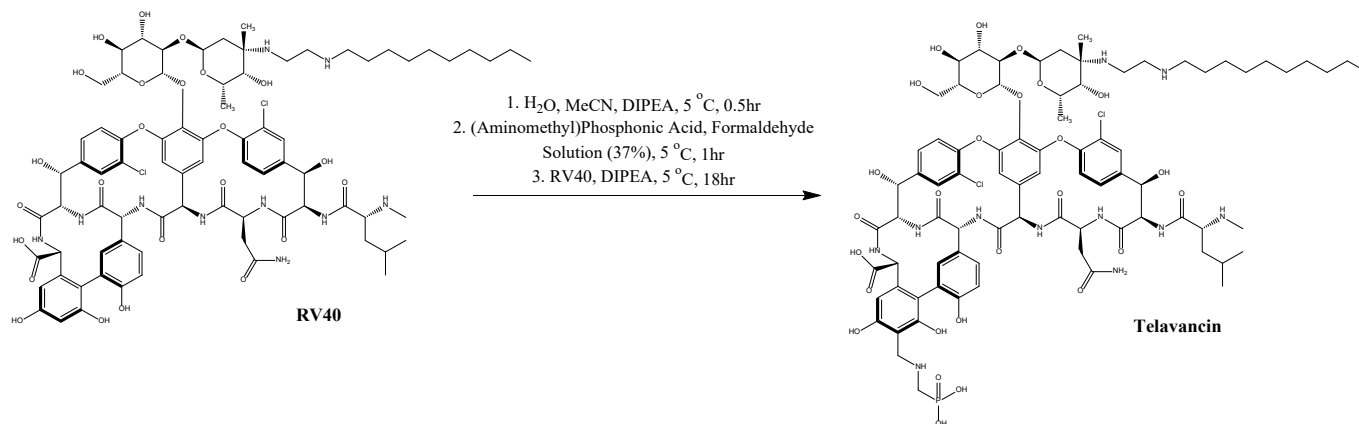

620

621 **Scheme S25: Synthesis of Telavancin**

622 **CHEMICAL CHARACTERIZATION**

623 **NMR SPECTRA**

624

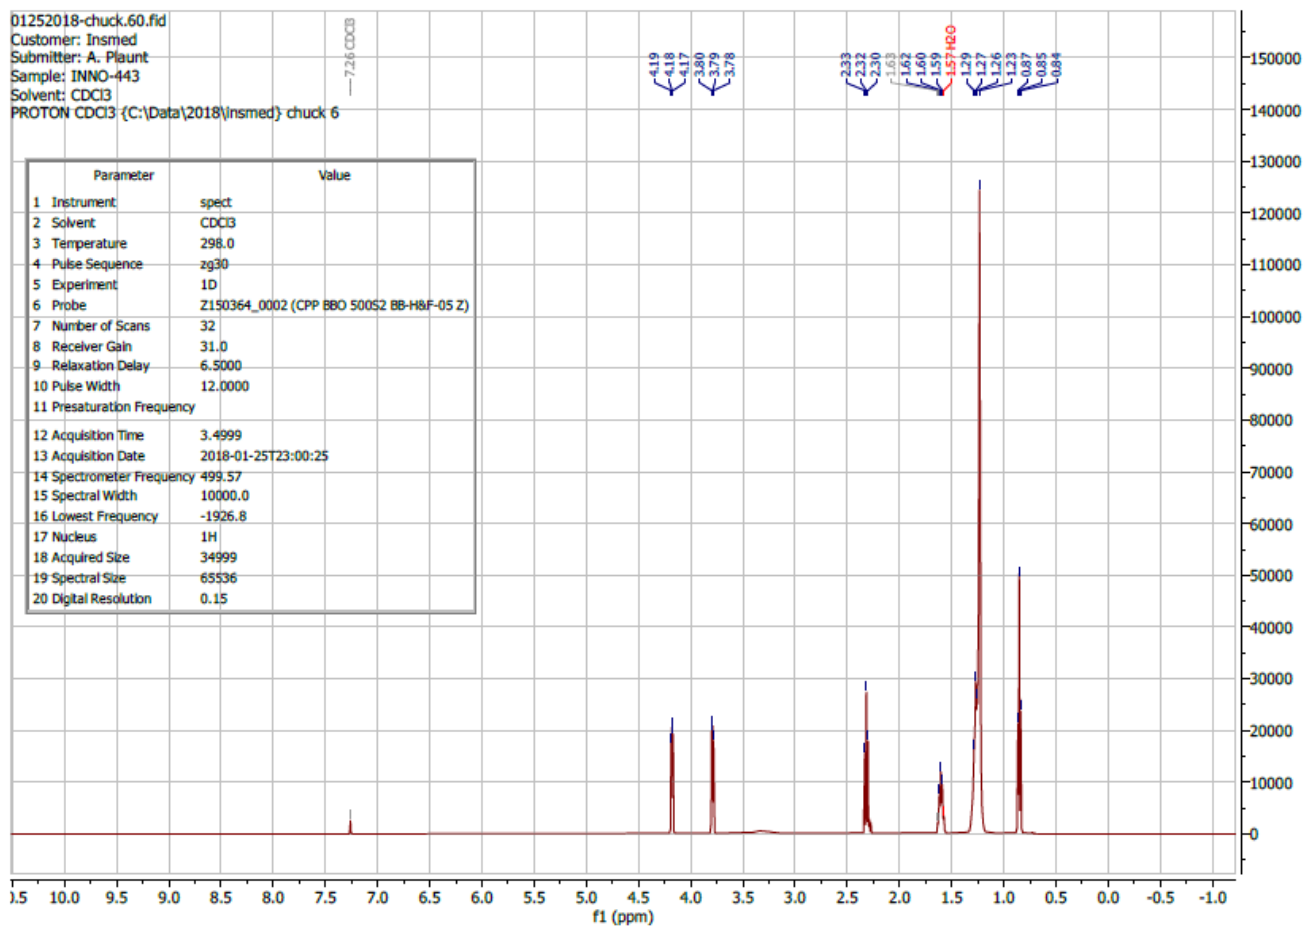

625

626 **Figure S6: 1H NMR of 2-Hydroxyethyl Dodecanoate**

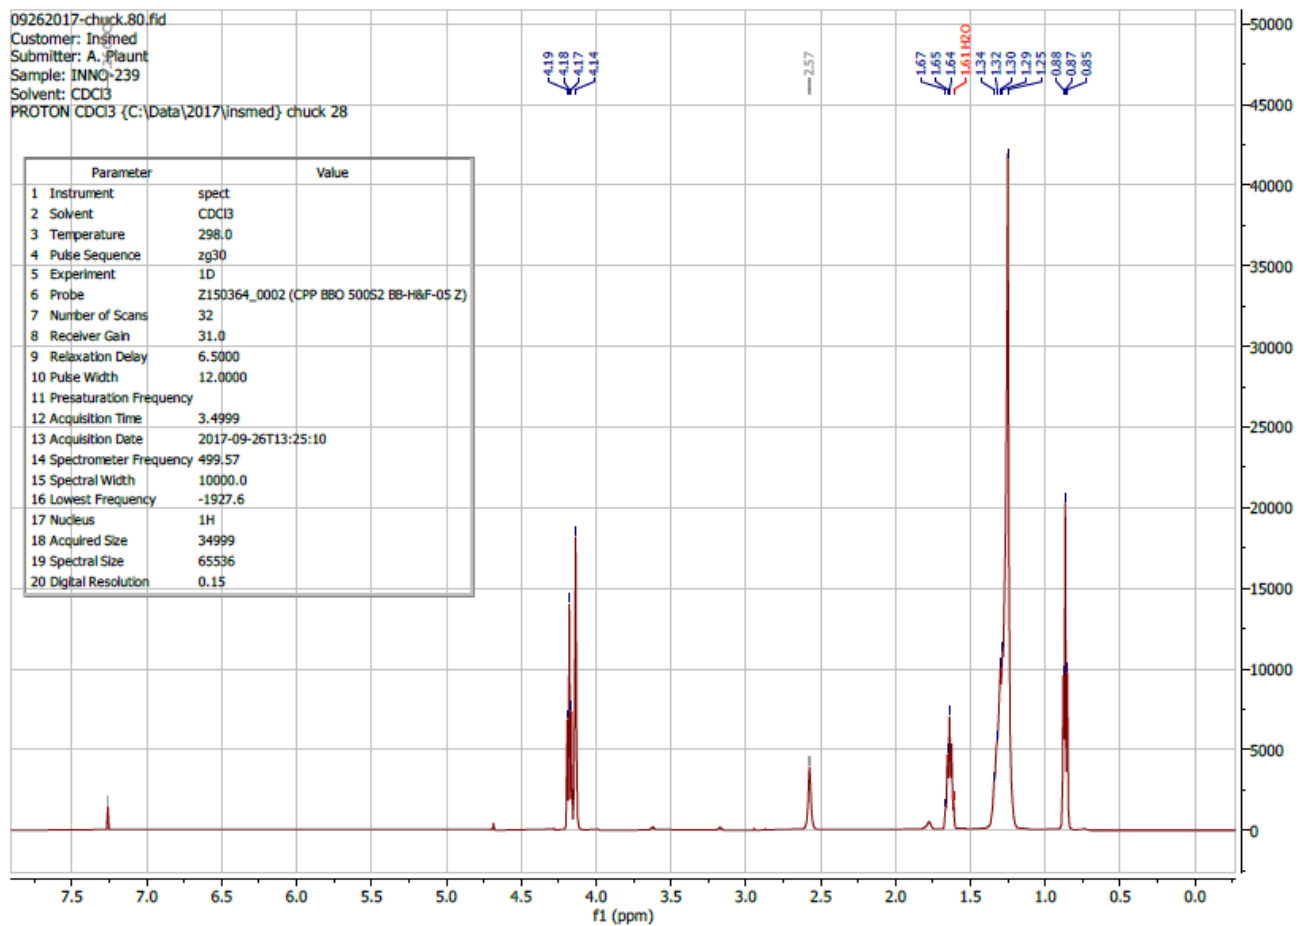

627

628 Figure S7: <sup>1</sup>H NMR of Decyl 2-Hydroxyacetate

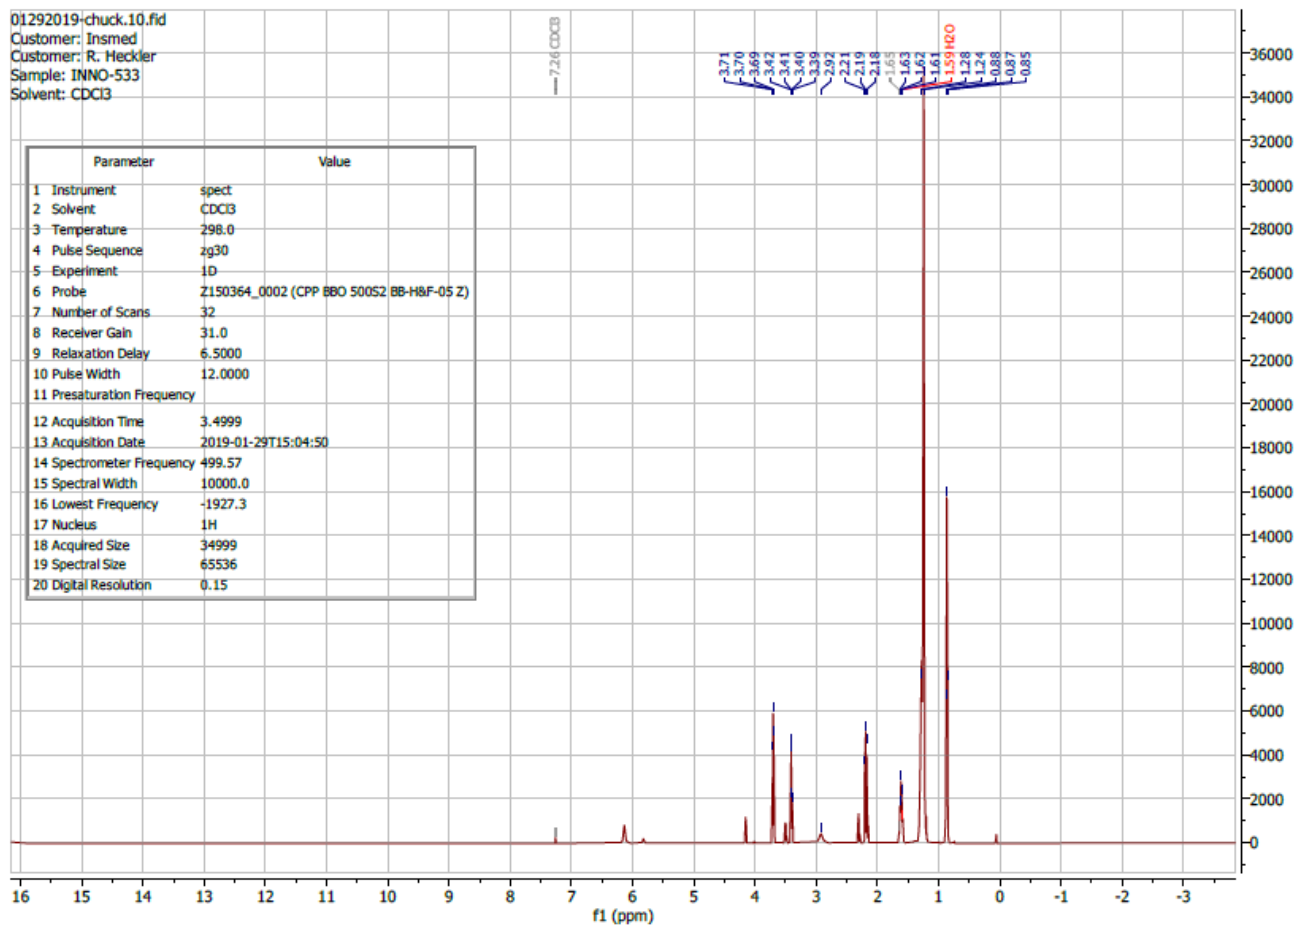

629

630 **Figure S8: <sup>1</sup>H NMR of N-(2-Hydroxyethyl)decanamide**



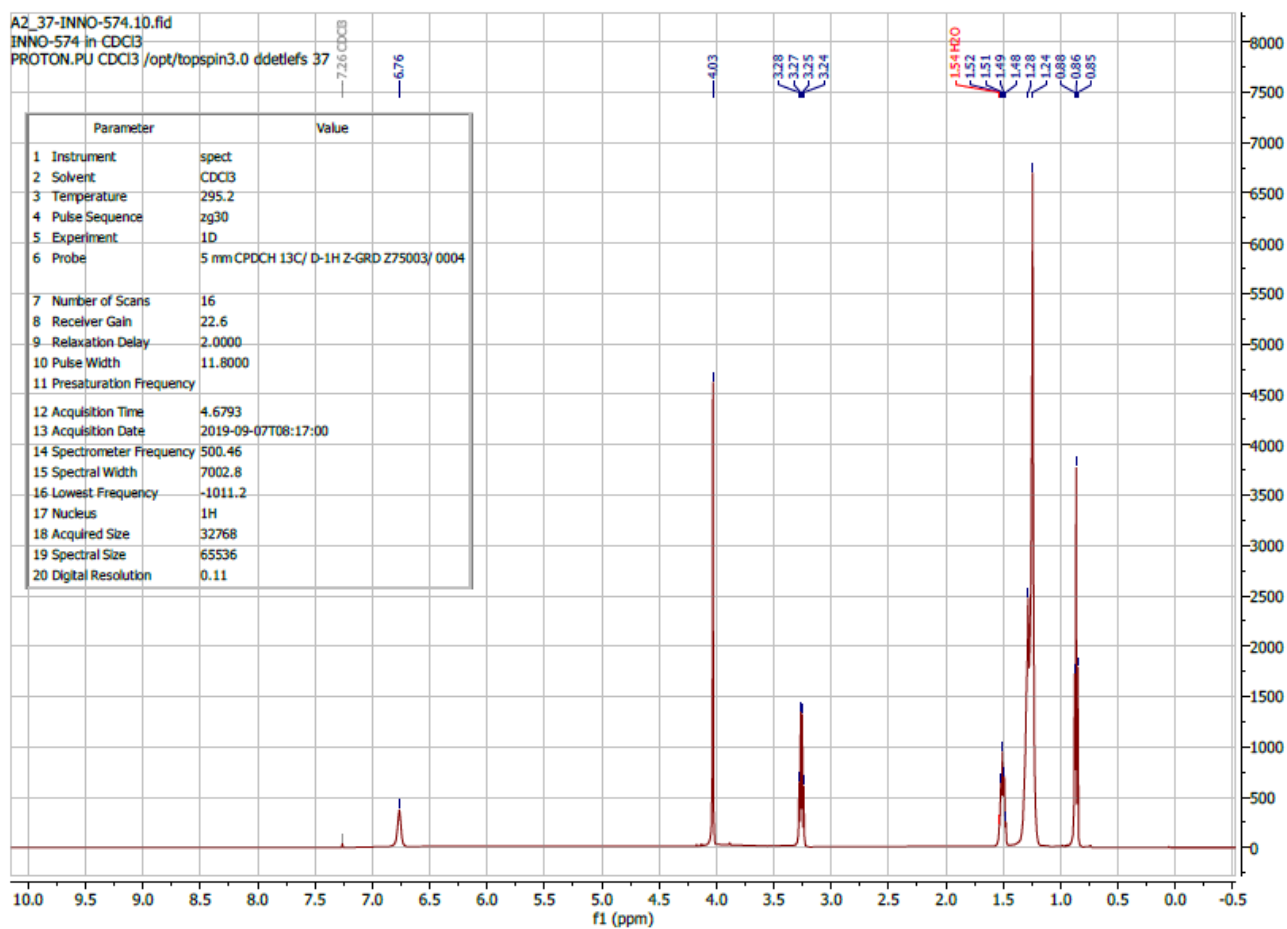

633

634 Figure S10: 1H NMR of N-Decyl-2-Hydroxyacetamide

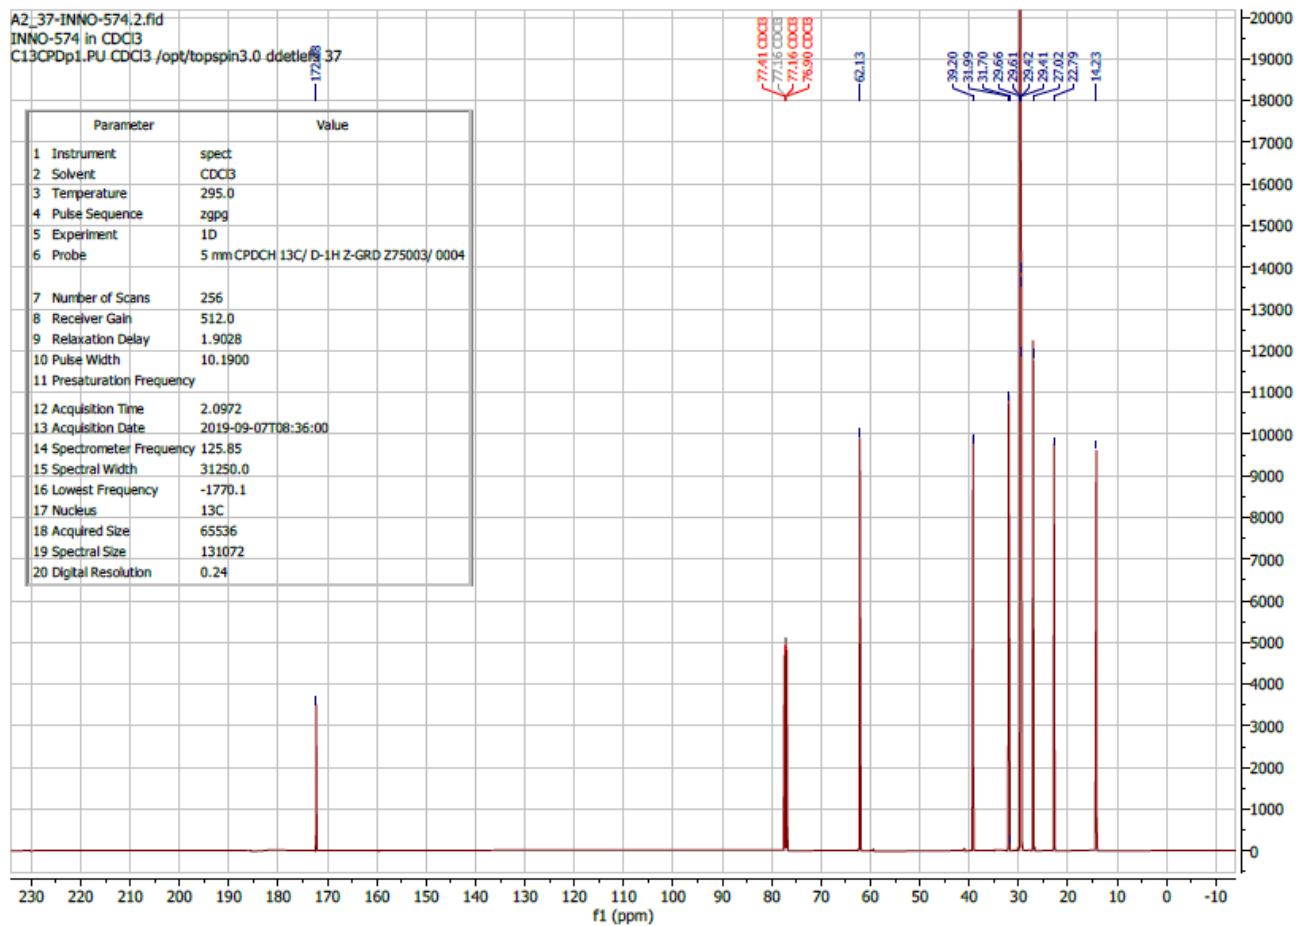

635

636 Figure S11: <sup>13</sup>C NMR of N-Decyl-2-Hydroxyacetamide

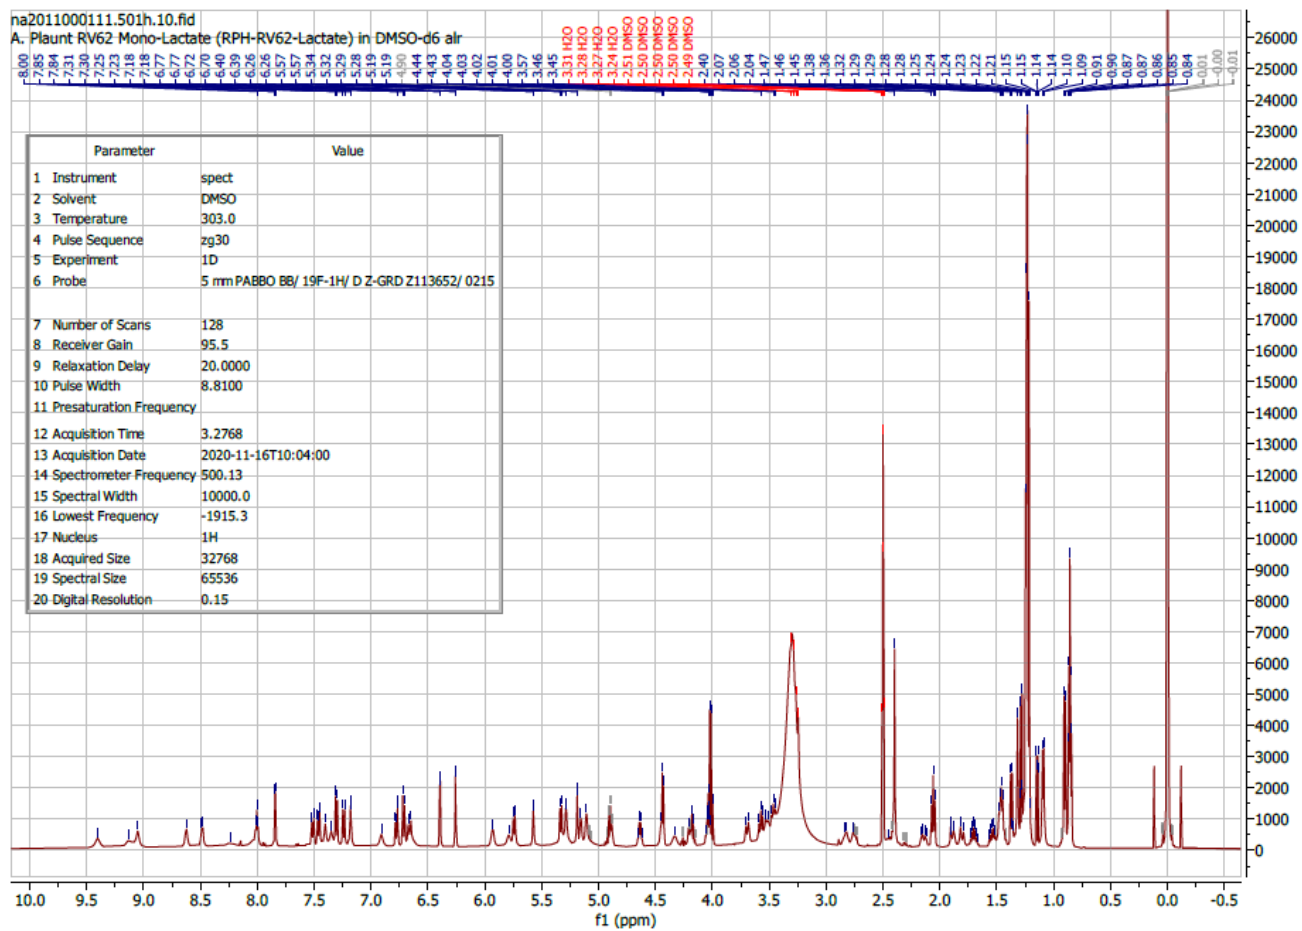

637

638 Figure S12: 1H NMR of RV62



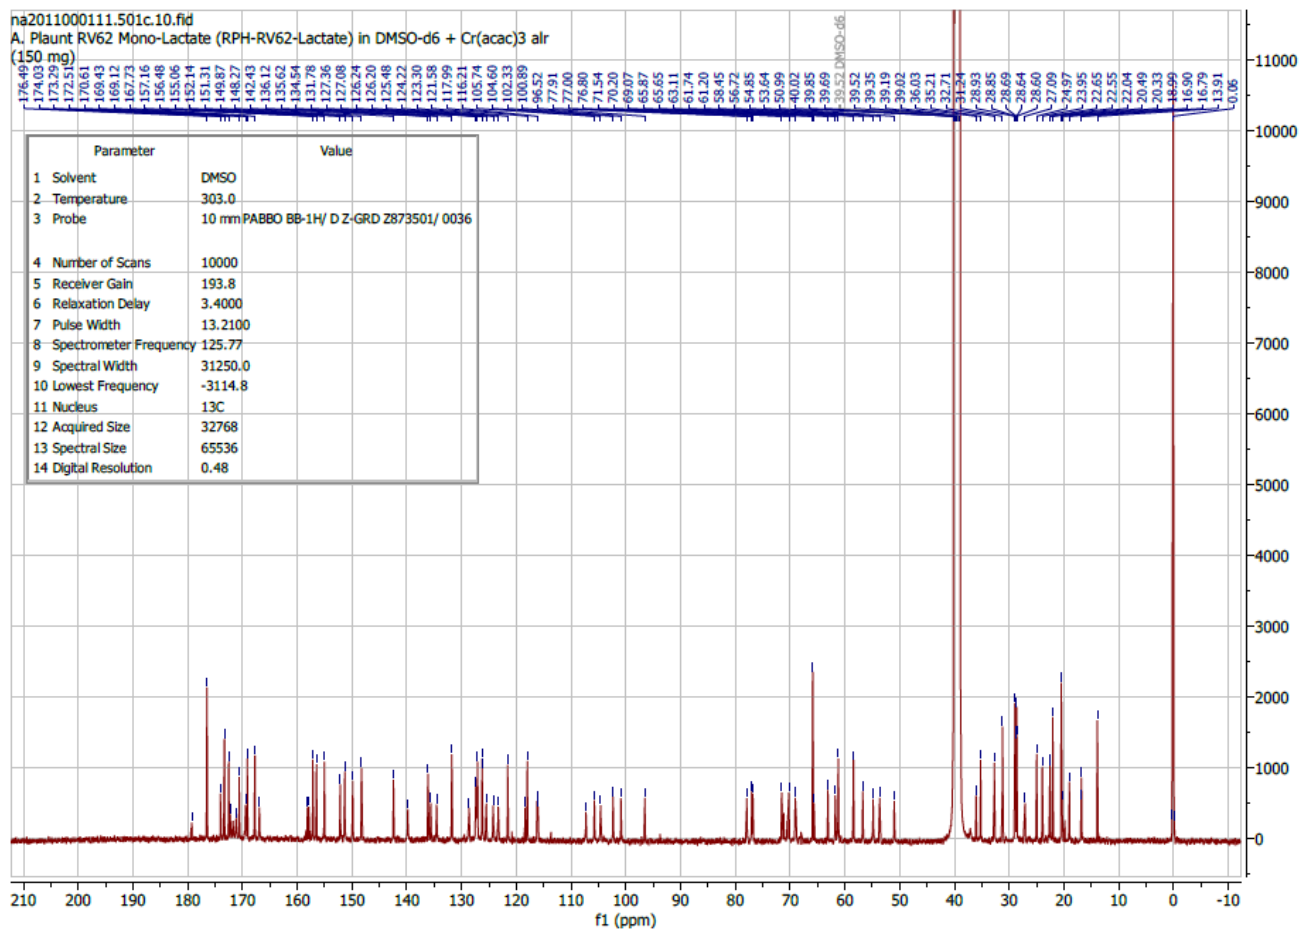

639

640 Figure S13: <sup>13</sup>C NMR of RV62

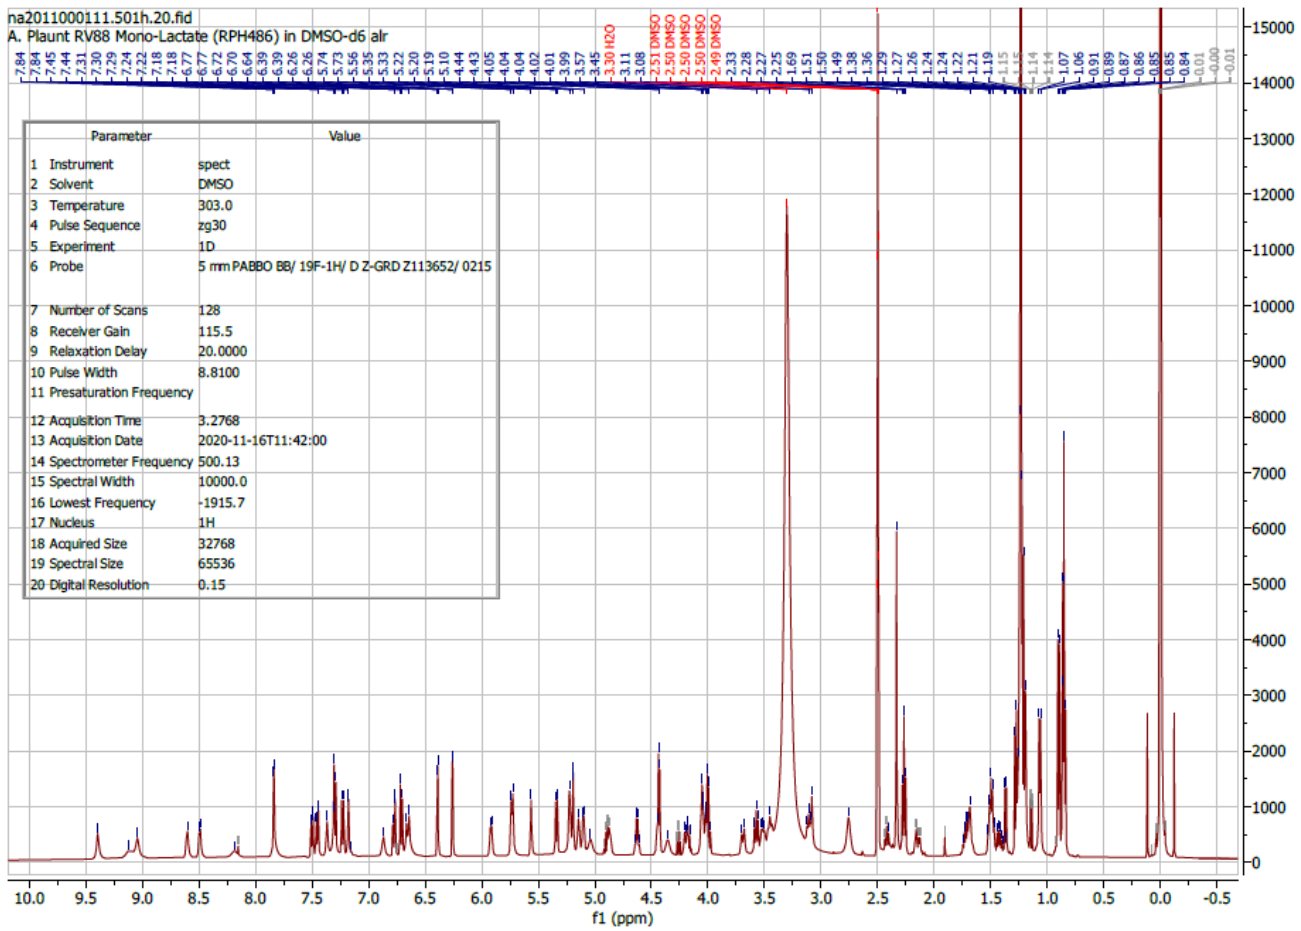

641

642 **Figure S14: 1H NMR of RV88**

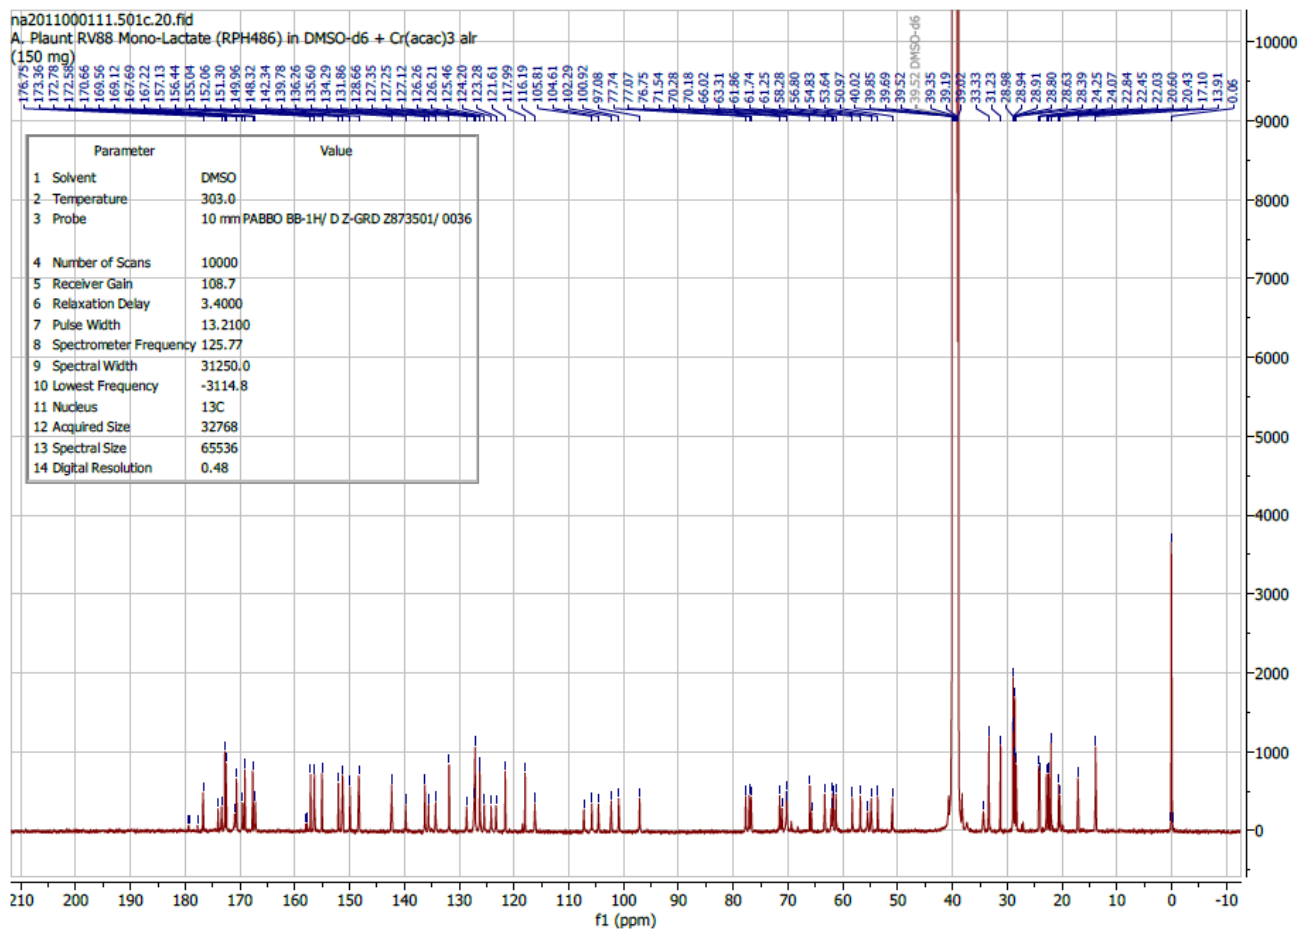

643

644 Figure S15: <sup>13</sup>C NMR of RV88

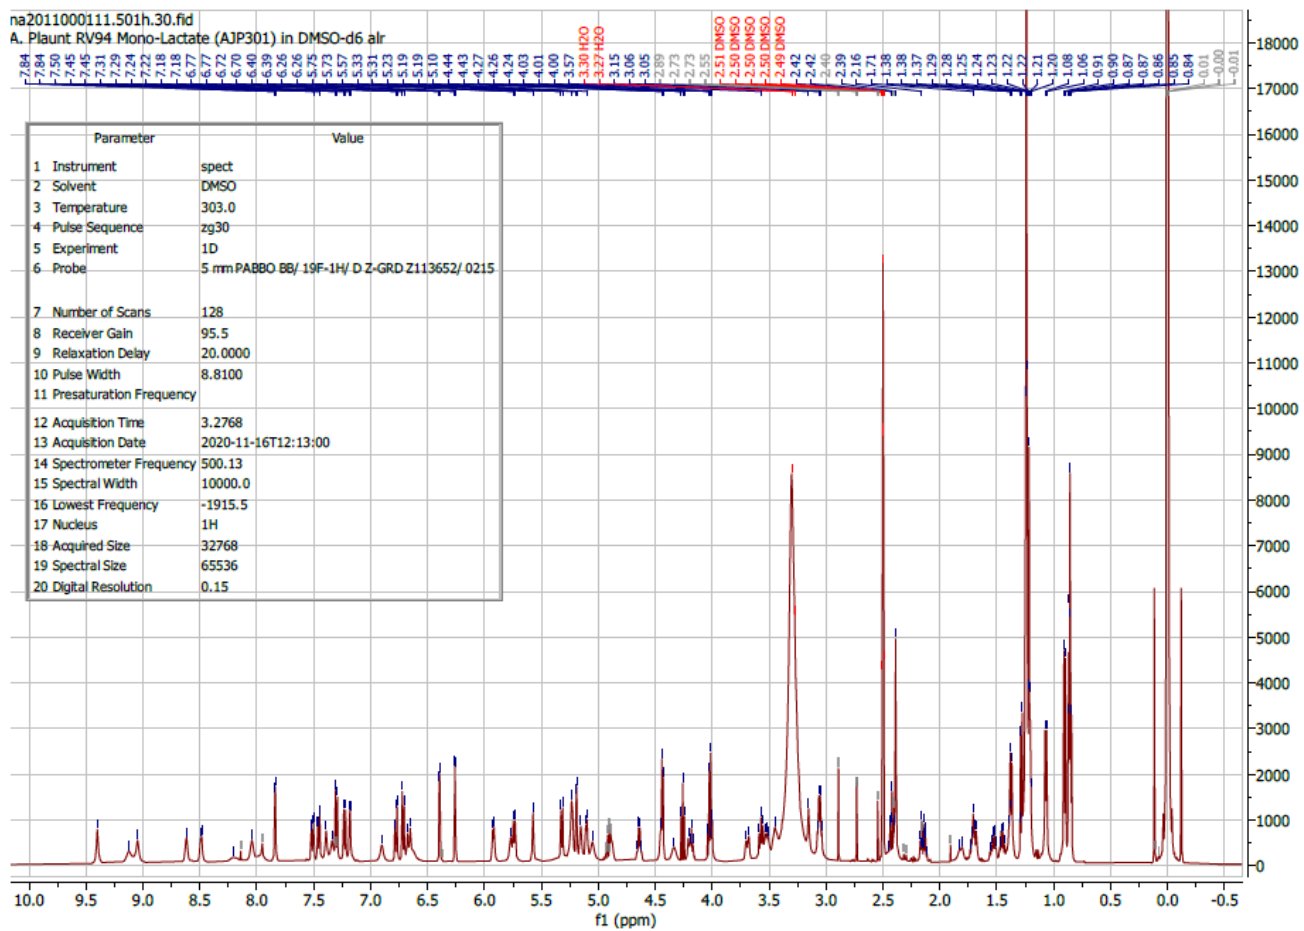

645

646 **Figure S16: 1H NMR of RV94**

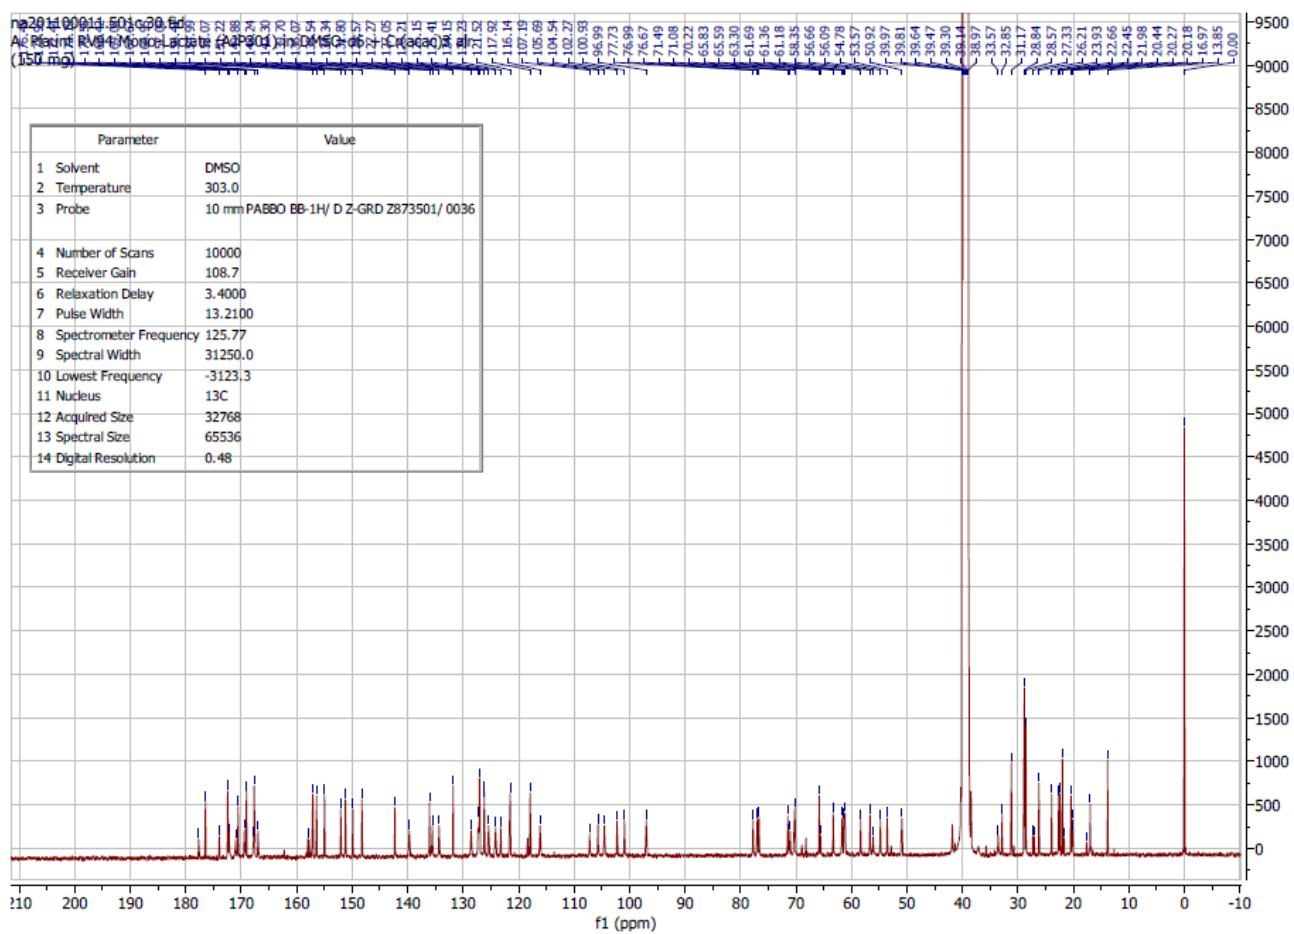

647

648 **Figure S17: <sup>13</sup>C NMR of RV94**

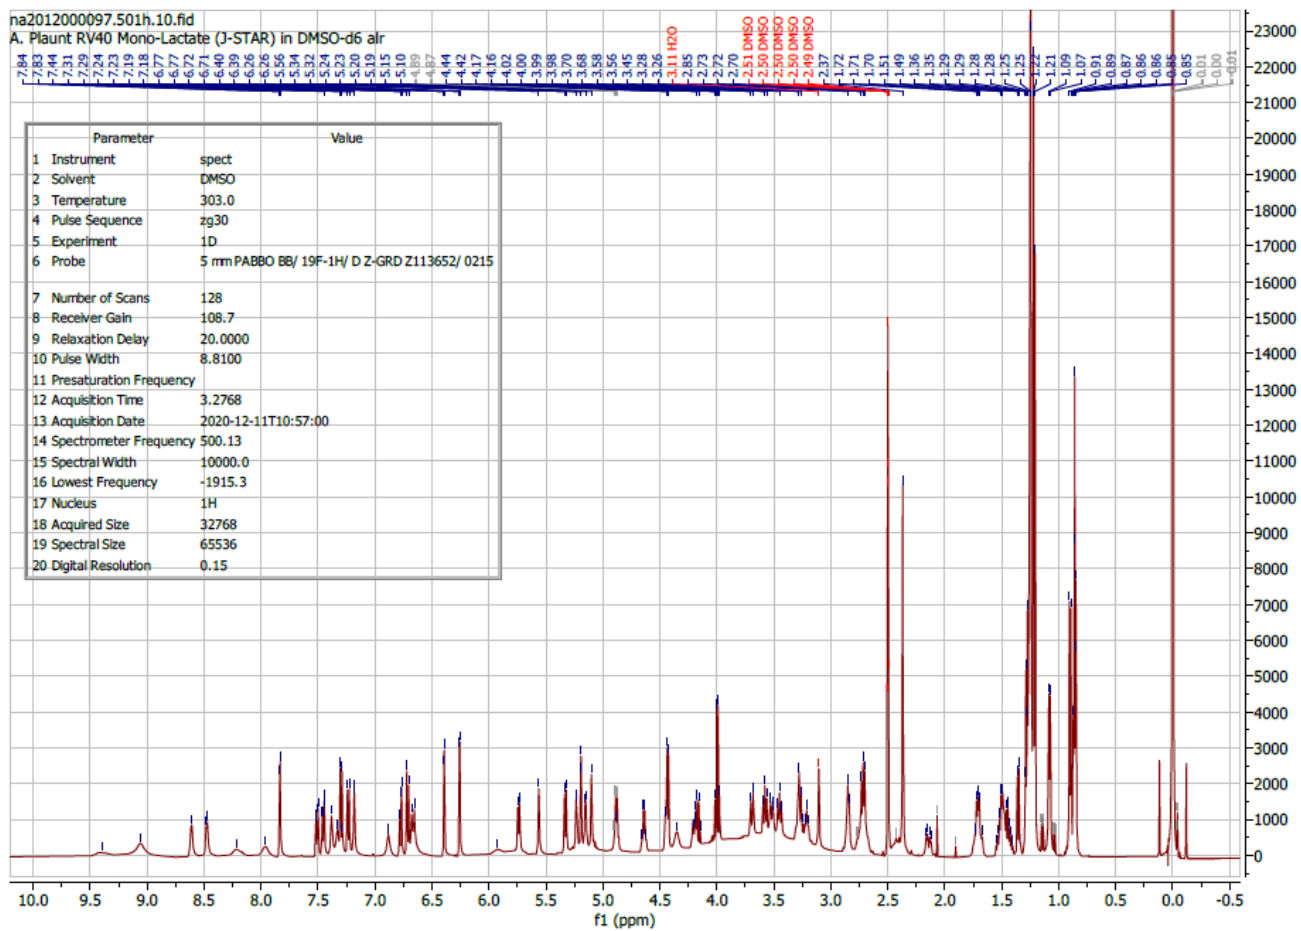

649

650 **Figure S18: 1H NMR of RV40**

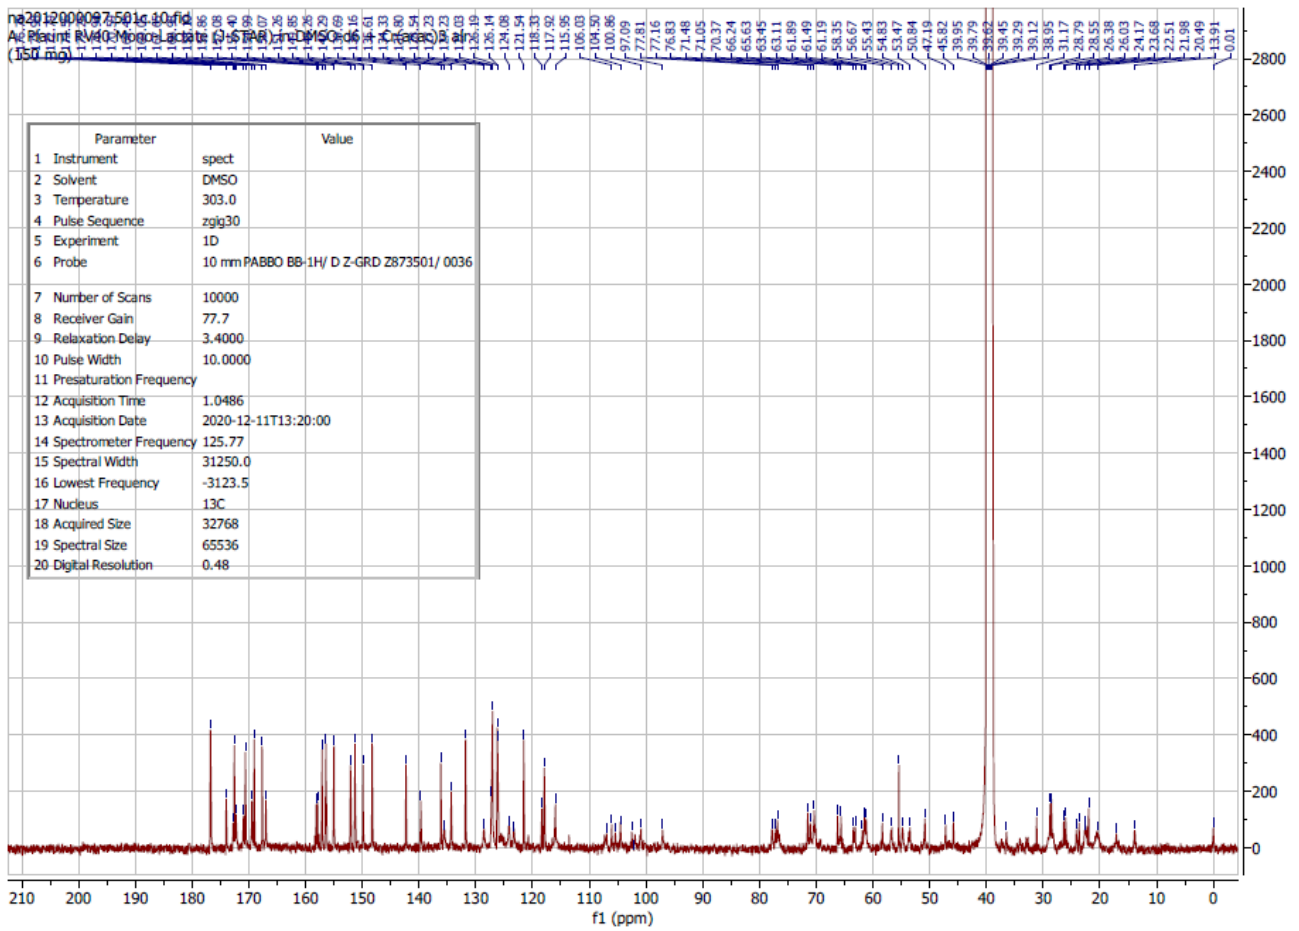

651

652 **Figure S19: 13C NMR of RV40**

653 **MS DATA**

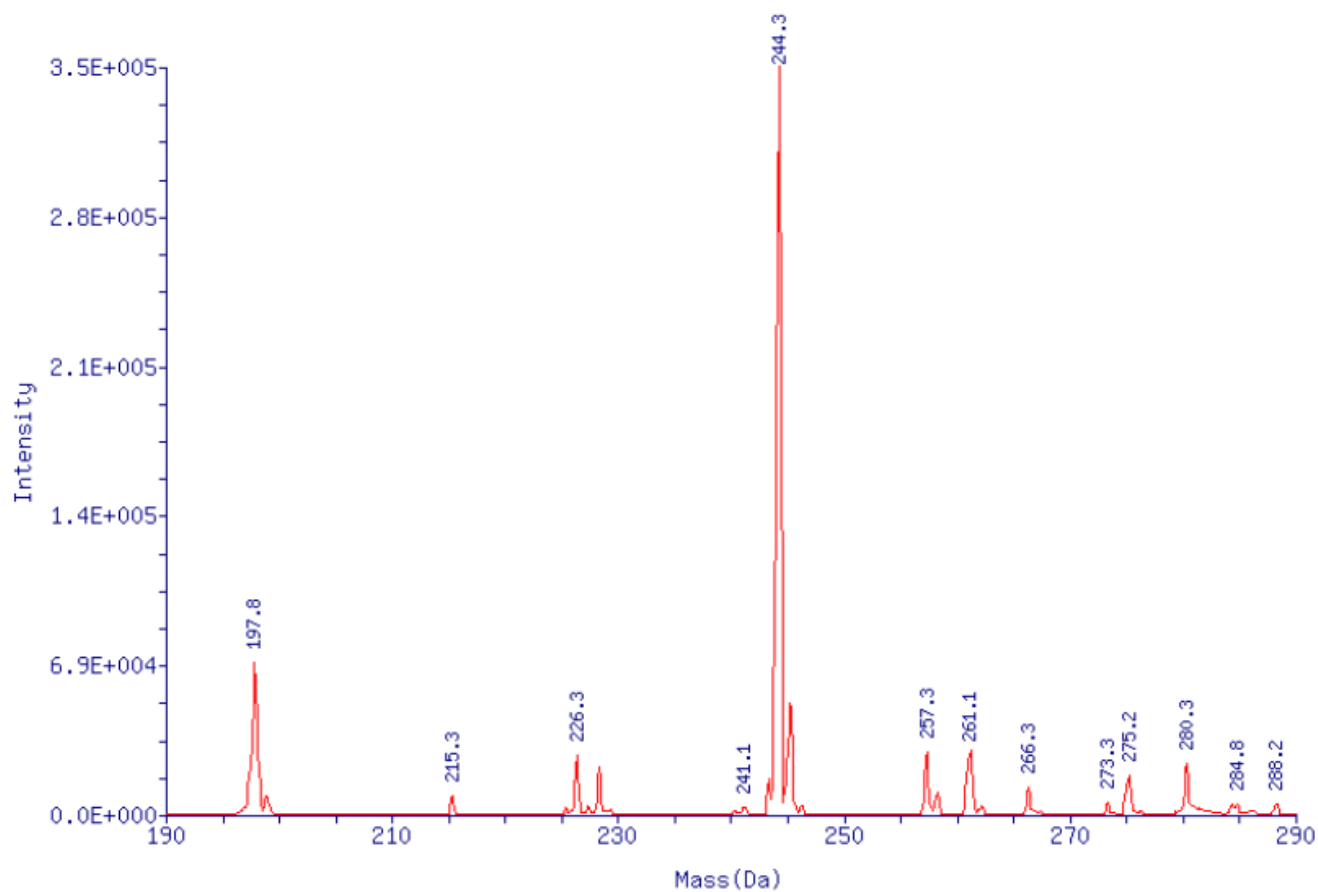

654

655 **Figure S20: MS Data for 2-Hydroxyethyl Dodecanoate**



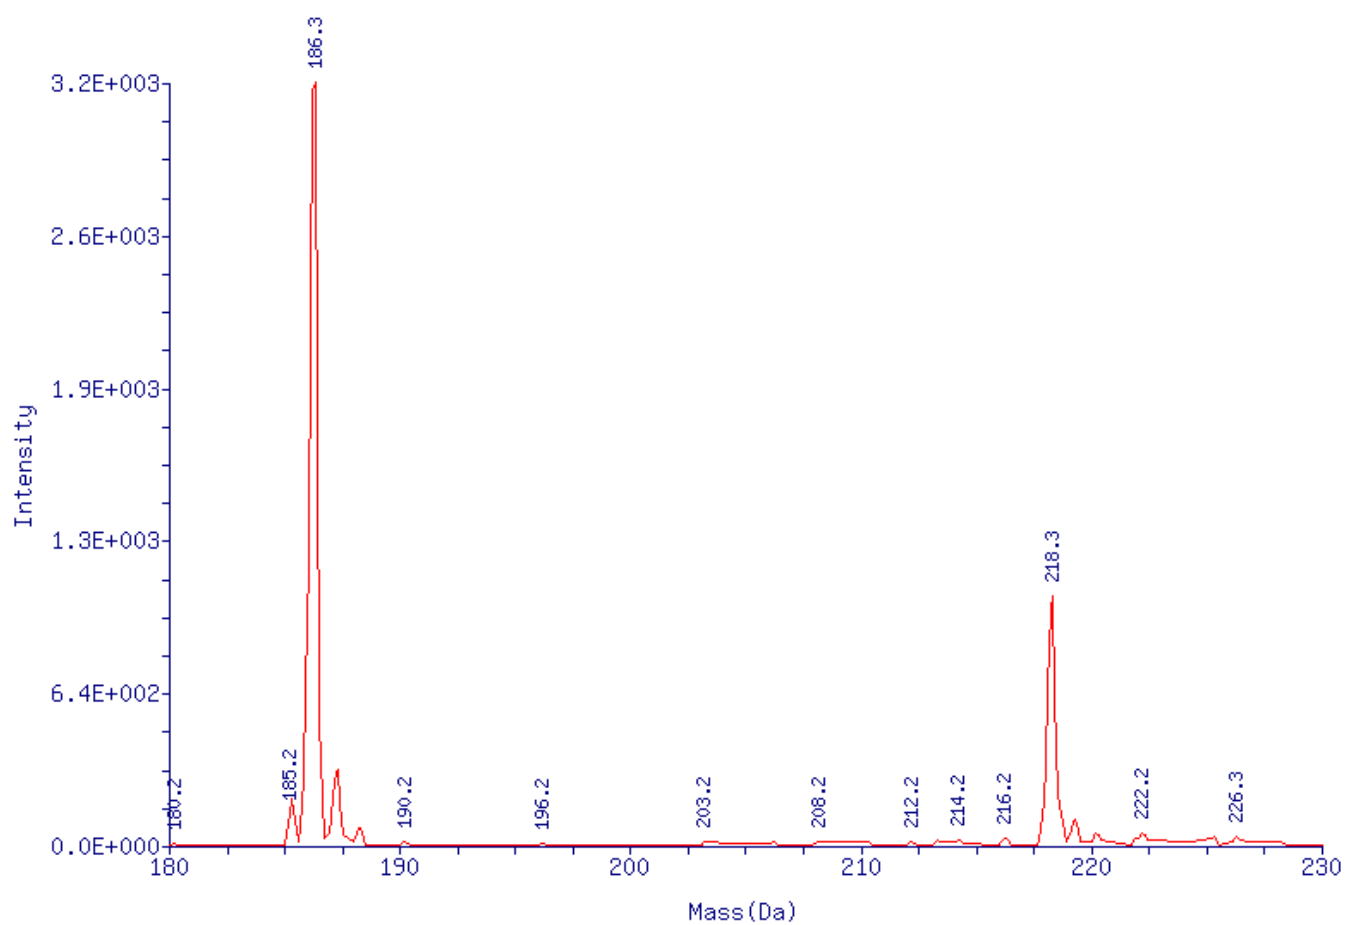

656

657 **Figure S21: MS Data for Decyl 2-Hydroxyacetate**

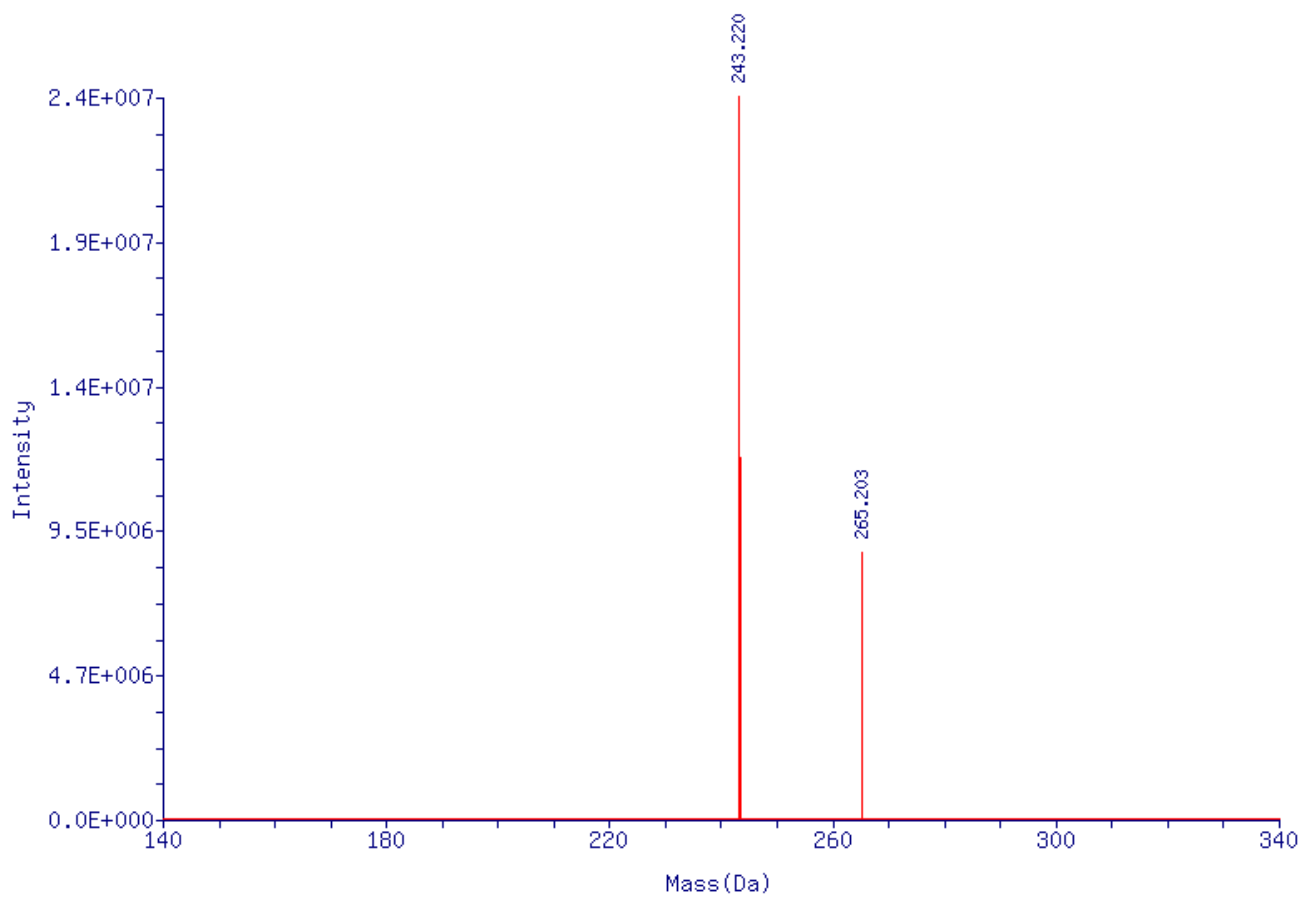

658

659 **Figure S22: MS Data for N-(2-Hydroxyethyl)decanamide**

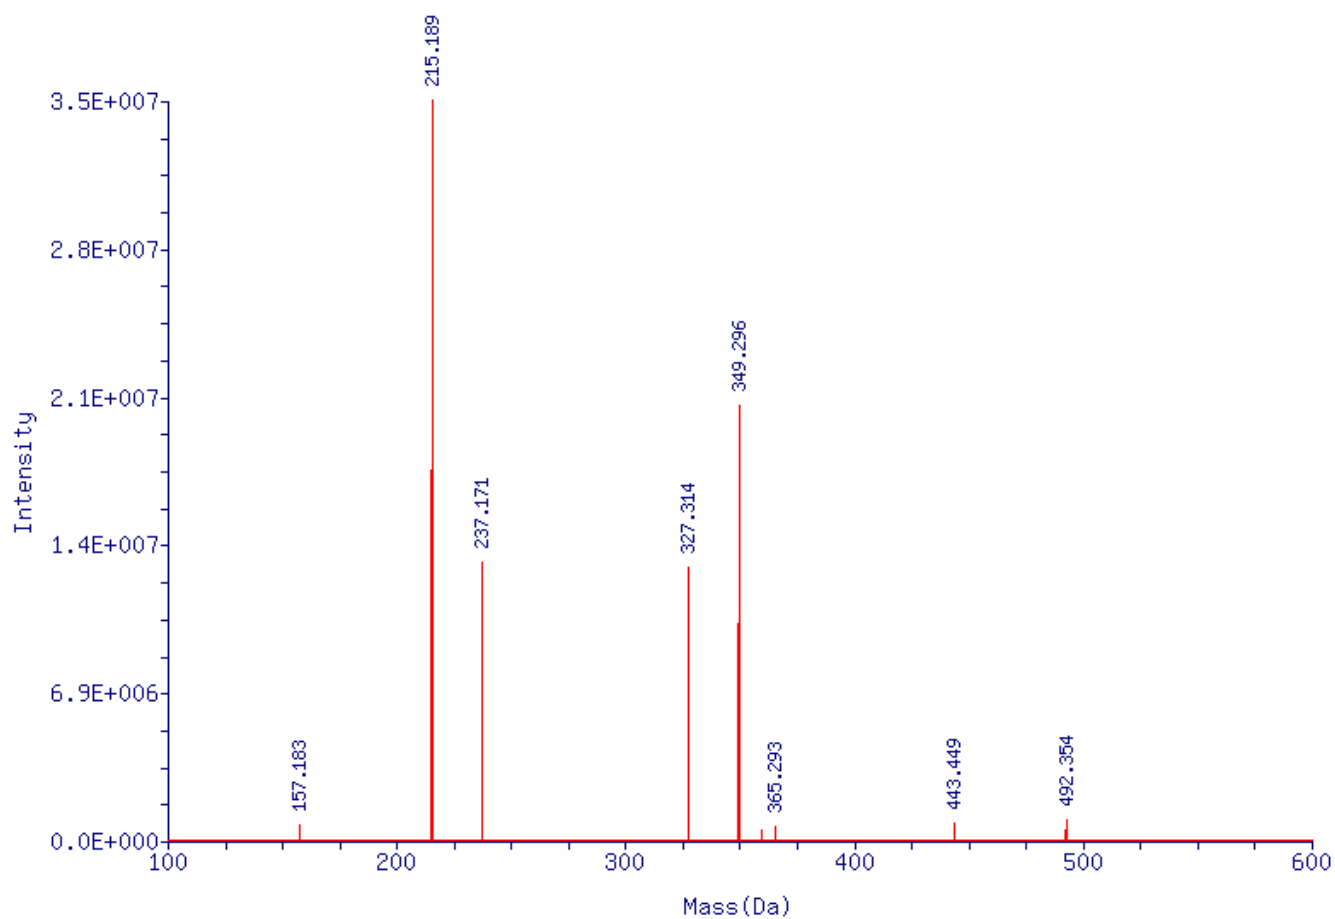

660

661 **Figure S23: MS Data for N-Decyl-2-Hydroxyacetamide**

662 **HPLC & LCMS CHROMATOGRAMS**

663 **RV40: HPLC:** Analytical HPLC trace of RV40 showing >98% purity. **LCMS:** Method: 2.1 x 100 mm Halo  
664 Peptide ES-C18, 2.7 μm, 2-40% in 20 min after 1 min hold, 0.4 mL/min, 50 °C, A = 0.05% TFA in H<sub>2</sub>O, B  
665 = 0.05% TFA in ACN. LC-MS (ESI<sup>+</sup>) calculated for C<sub>78</sub>H<sub>100</sub>Cl<sub>2</sub>N<sub>10</sub>O<sub>24</sub> [M+H]<sup>+</sup> m/z: 1630.6289; found:  
666 1630.630; retention time = 17.9 minutes.

667

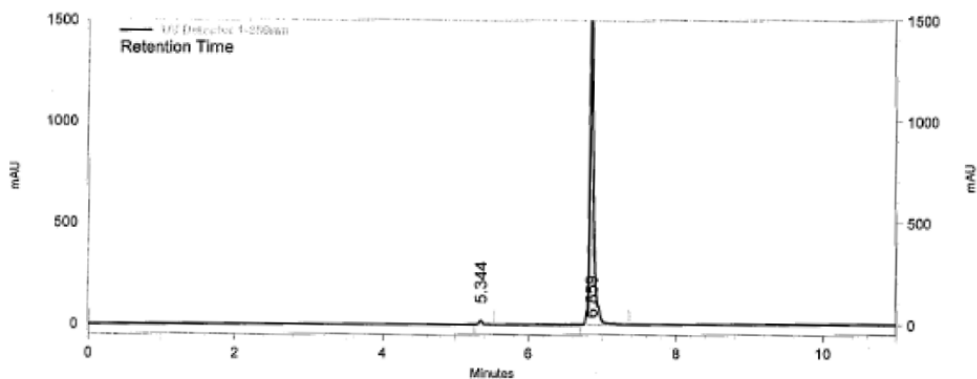

UV Detector 1-280nm Results  
(System: 10/23/2017 6:08:52  
PM) (Original)

| PK # | Retention Time | Area    | Area Percent | Integration Codes |
|------|----------------|---------|--------------|-------------------|
| 1    | 5.344          | 59067   | 1.067        | BB                |
| 2    | 6.859          | 5478688 | 98.933       | BB                |

668

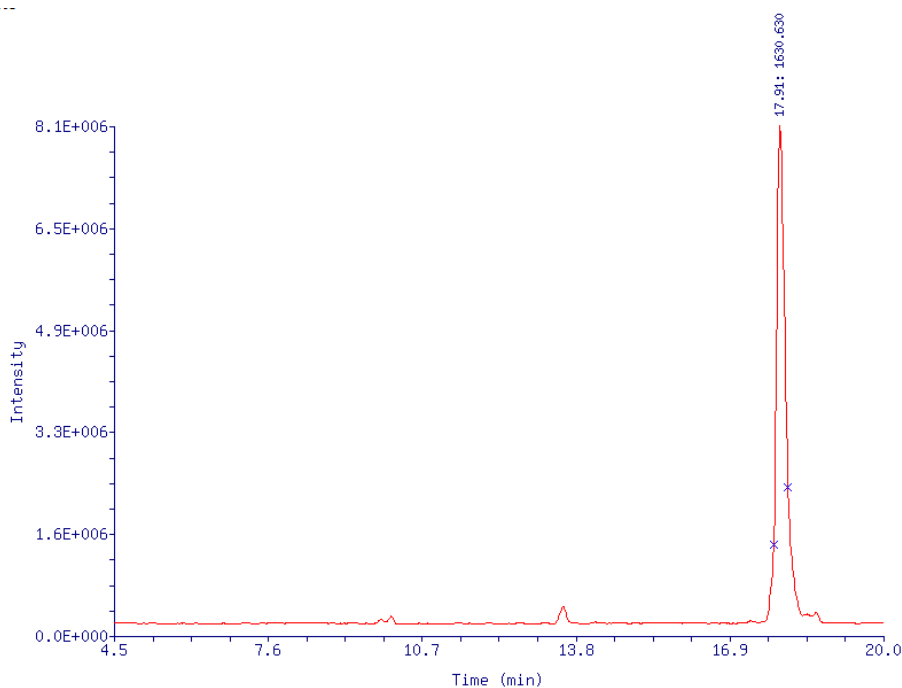

669

670 **Figure S24: HPLC (top) and LCMS (bottom) Chromatograms for RV40**

671 **Telavancin: HPLC:** Analytical HPLC trace of TLV showing >98% purity. **LCMS:** Method: 2.1 x 100 mm  
 672 Halo Peptide ES-C18, 2.7 μm, 2-40% in 20 min after 1 min hold, 0.4 mL/min, 50 °C, A = 0.05% TFA in  
 673 H<sub>2</sub>O, B = 0.05% TFA in ACN. LC-MS (ESI<sup>+</sup>) calculated for C<sub>80</sub>H<sub>106</sub>Cl<sub>2</sub>N<sub>11</sub>O<sub>27</sub>P [M+H]<sup>+</sup> m/z: 1753.6374;  
 674 found: 1753.637; retention time = 13.3 minutes.

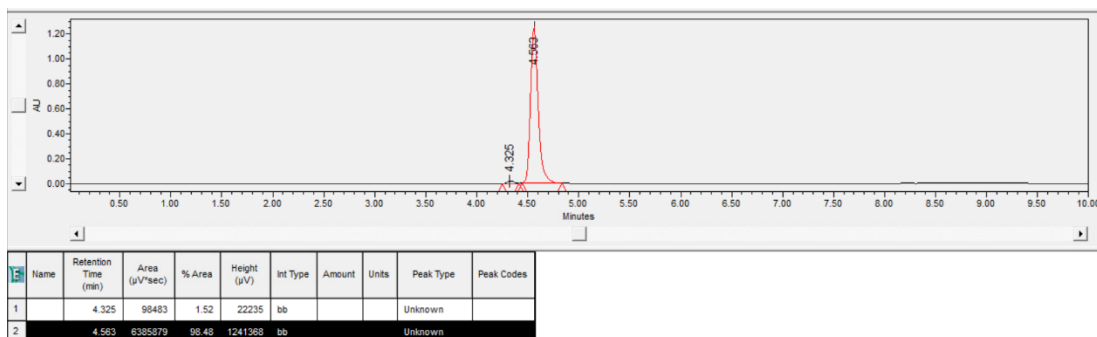

675

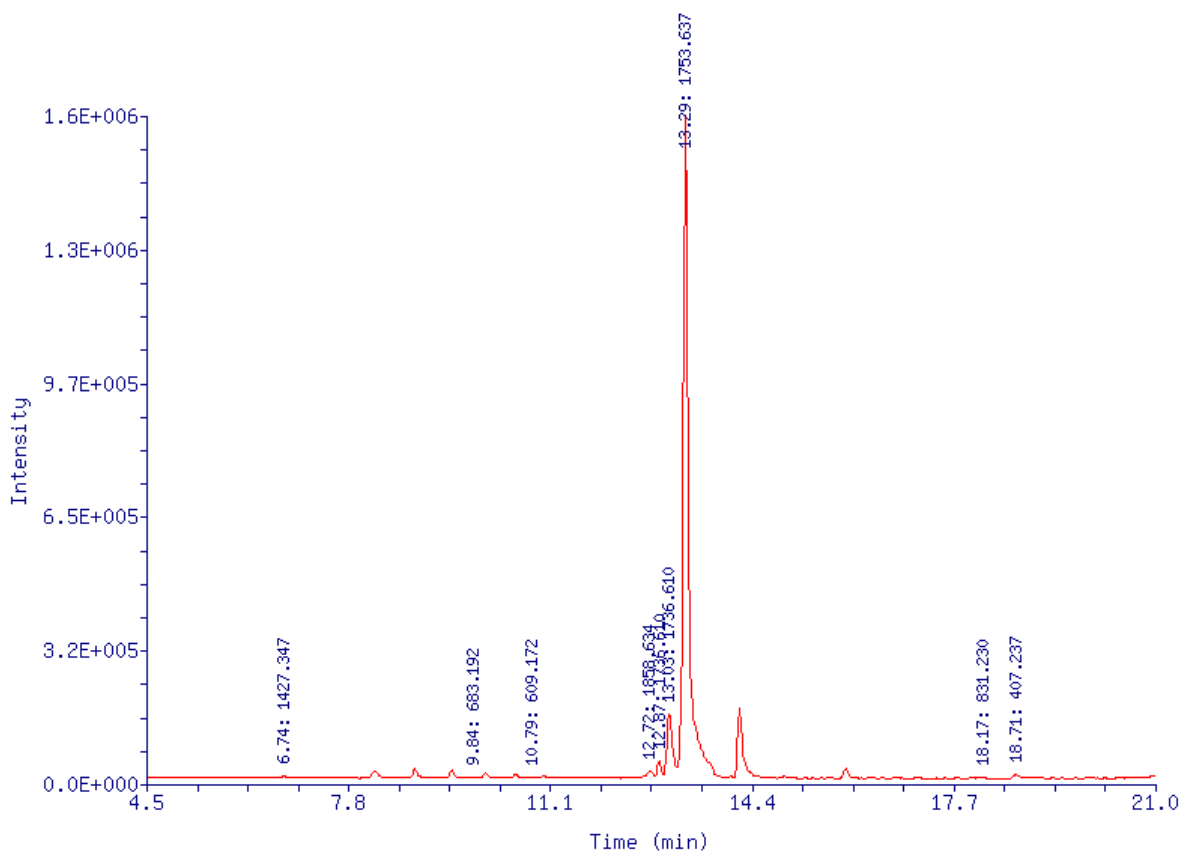

676

677 **Figure S25: HPLC (top) and LCMS (bottom) Chromatograms for TLV**

678 **RV90: HPLC:** Analytical HPLC trace of RV90 showing >98% purity. **LCMS:** Method: 2.1 x 100 mm Halo  
 679 Peptide ES-C18, 2.7  $\mu\text{m}$ , 2-40% in 20 min after 1 min hold, 0.4 mL/min, 50  $^{\circ}\text{C}$ , A = 0.05% TFA in  $\text{H}_2\text{O}$ , B  
 680 = 0.05% TFA in ACN. LC-MS (ESI<sup>+</sup>) calculated for  $\text{C}_{76}\text{H}_{93}\text{Cl}_2\text{N}_9\text{O}_{26}$  [M+H]<sup>+</sup> *m/z*: 1617.5609; found:  
 681 1617.561; retention time = 15.2-15.6 minutes.

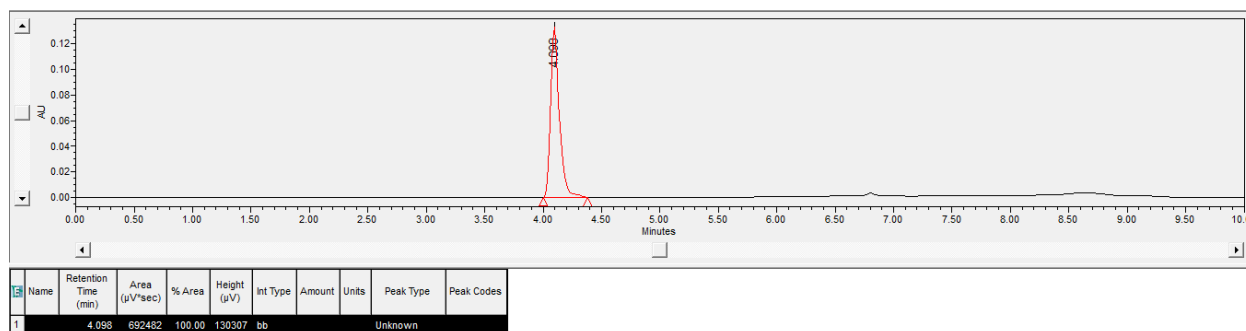

682

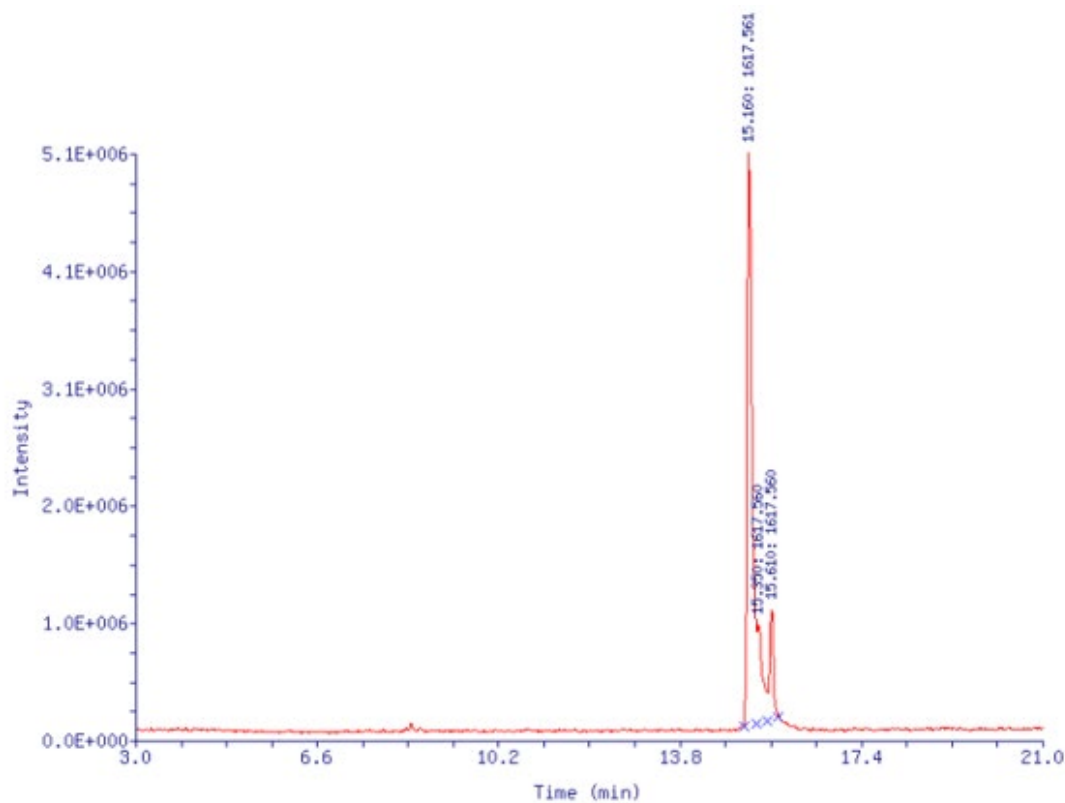

683

684 **Figure S26: HPLC (top) and LCMS (bottom) Chromatograms for RV90**

685 **RV54: HPLC:** Analytical HPLC trace of RV54 showing >98% purity. **LCMS:** Method: 2.1 x 100 mm Halo  
686 Peptide ES-C18, 2.7  $\mu\text{m}$ , 2-40% in 20 min after 1 min hold, 0.4 mL/min, 50  $^{\circ}\text{C}$ , A = 0.05% TFA in  $\text{H}_2\text{O}$ , B  
687 = 0.05% TFA in ACN. LC-MS (ESI<sup>+</sup>) calculated for  $\text{C}_{78}\text{H}_{97}\text{Cl}_2\text{N}_9\text{O}_{26}$  [M+H]<sup>+</sup> *m/z*: 1645.9522; found:  
688 1645.592; retention time = 15.7-16.1 minutes.

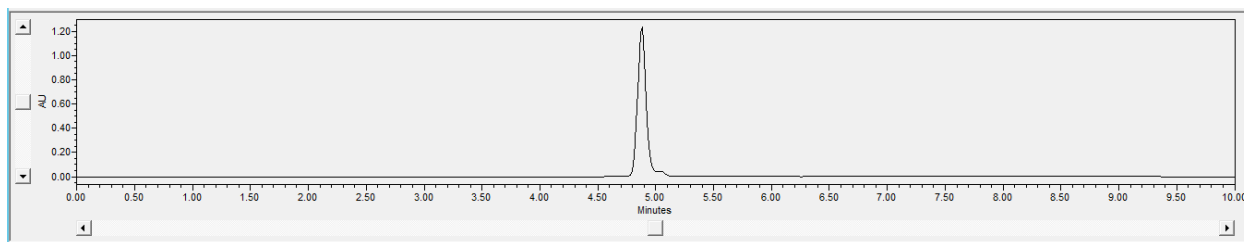

689

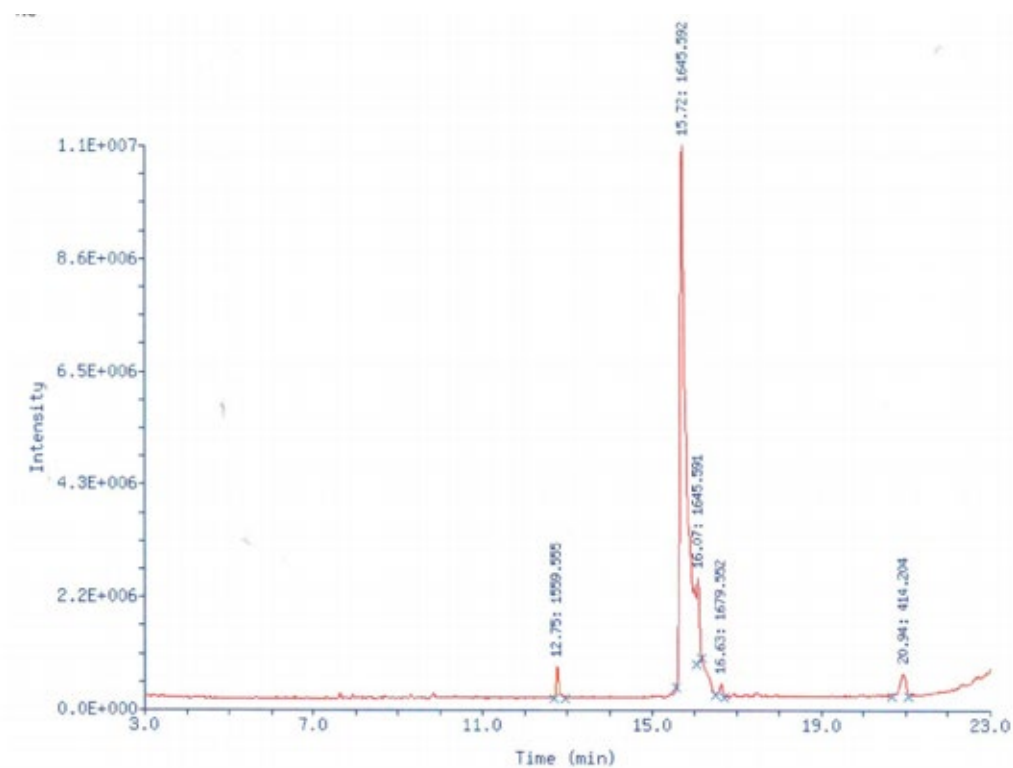

690

691 **Figure S27: HPLC (top) and LCMS (bottom) Chromatograms for RV54**

692 **RV65: HPLC:** Analytical HPLC trace of RV65 showing >98% purity. **LCMS:** Method: 2.1 x 100 mm Halo  
693 Peptide ES-C18, 2.7  $\mu\text{m}$ , 2-40% in 20 min after 1 min hold, 0.4 mL/min, 50  $^{\circ}\text{C}$ , A = 0.05% TFA in  $\text{H}_2\text{O}$ , B  
694 = 0.05% TFA in ACN. LC-MS (ESI $^{+}$ ) calculated for  $\text{C}_{80}\text{H}_{101}\text{Cl}_2\text{N}_9\text{O}_{24}$   $[\text{M}+\text{H}]^{+}$   $m/z$ : 1673.6235; found:  
695 1673.623; retention time = 19.6-18.9 minutes.

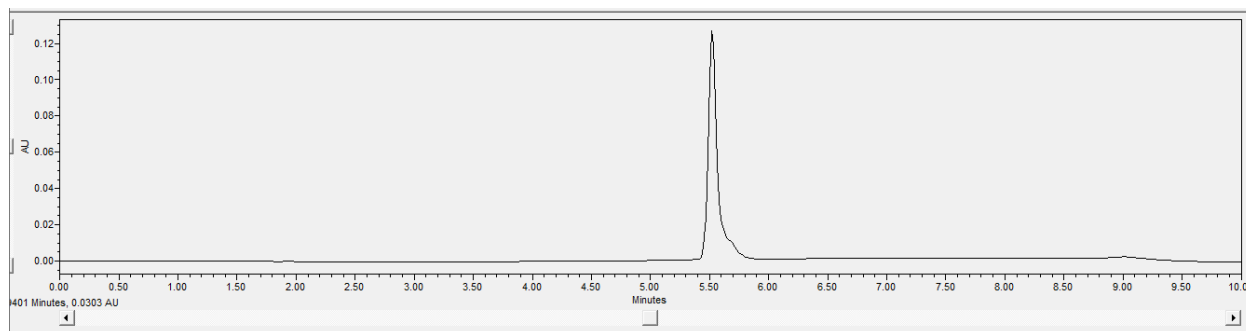

696

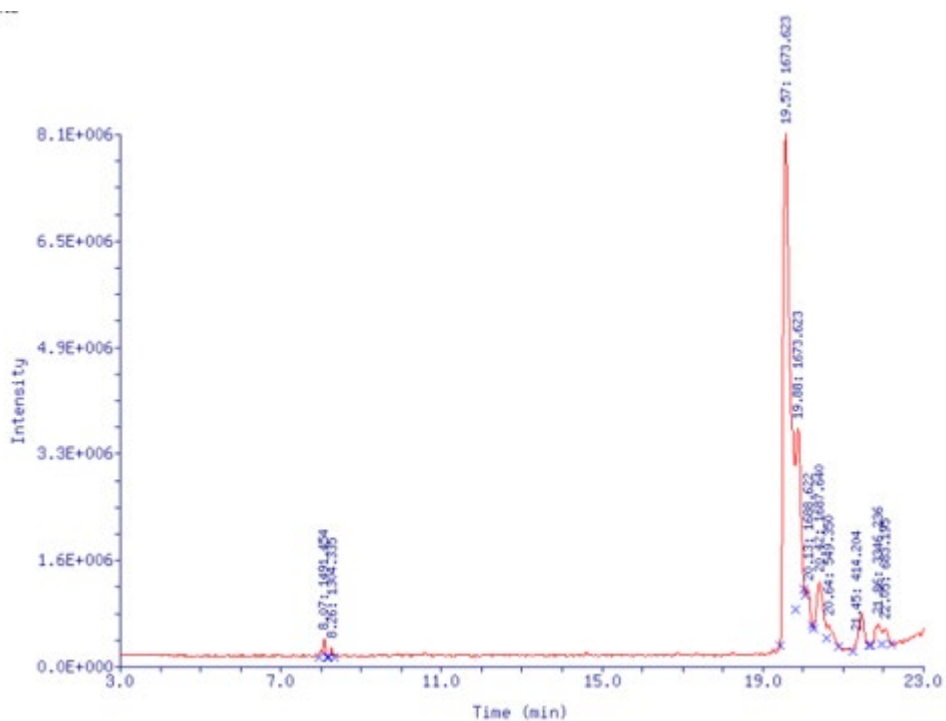

697

698 **Figure S28: HPLC (top) and LCMS (bottom) Chromatograms for RV65**



699 **RV88: HPLC:** Analytical HPLC trace of RV88 showing >98% purity. **LCMS:** Method: 2.1 x 100 mm Halo  
 700 Peptide ES-C18, 2.7 μm, 2-40% in 20 min after 1 min hold, 0.4 mL/min, 50 °C, A = 0.05% TFA in H<sub>2</sub>O, B  
 701 = 0.05% TFA in ACN. LC-MS (ESI<sup>+</sup>) calculated for C<sub>82</sub>H<sub>105</sub>Cl<sub>2</sub>N<sub>9</sub>O<sub>26</sub> [M+H]<sup>+</sup> *m/z*: 1701.6548; found:  
 702 1701.655; retention time = 22.1minutes.

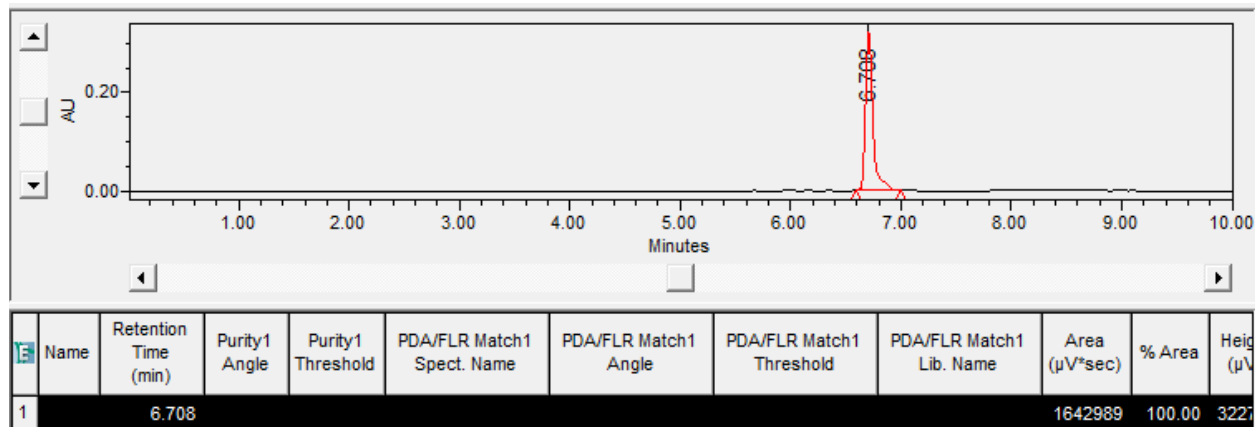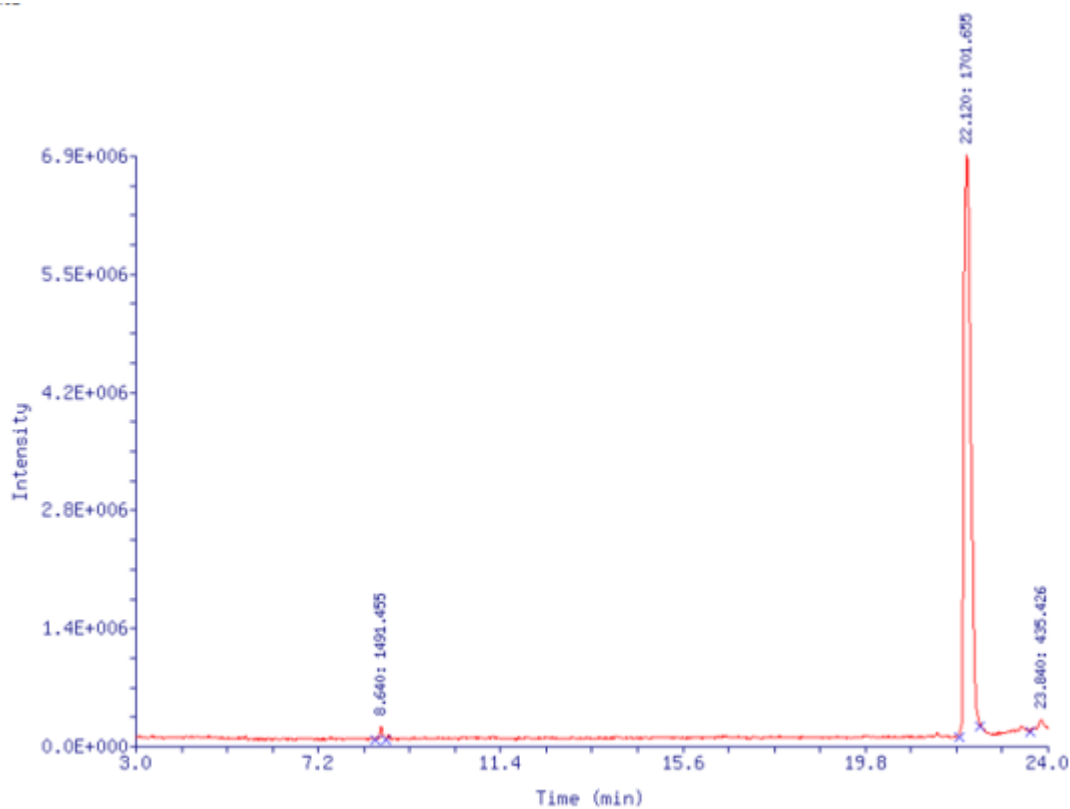

704  
 705 **Figure S29: HPLC (top) and LCMS (bottom) Chromatograms for RV88**

706 **RV89: HPLC:** Analytical HPLC trace of RV89 showing >98% purity. **LCMS:** Method: 2.1 x 100 mm Halo  
 707 Peptide ES-C18, 2.7 μm, 2-40% in 20 min after 1 min hold, 0.4 mL/min, 50 °C, A = 0.05% TFA in H<sub>2</sub>O, B  
 708 = 0.05% TFA in ACN. LC-MS (ESI<sup>+</sup>) calculated for C<sub>84</sub>H<sub>109</sub>Cl<sub>2</sub>N<sub>9</sub>O<sub>26</sub> [M+H]<sup>+</sup> *m/z*: 1729.6861; found:  
 709 1729.686; retention time = 22.7 minutes.

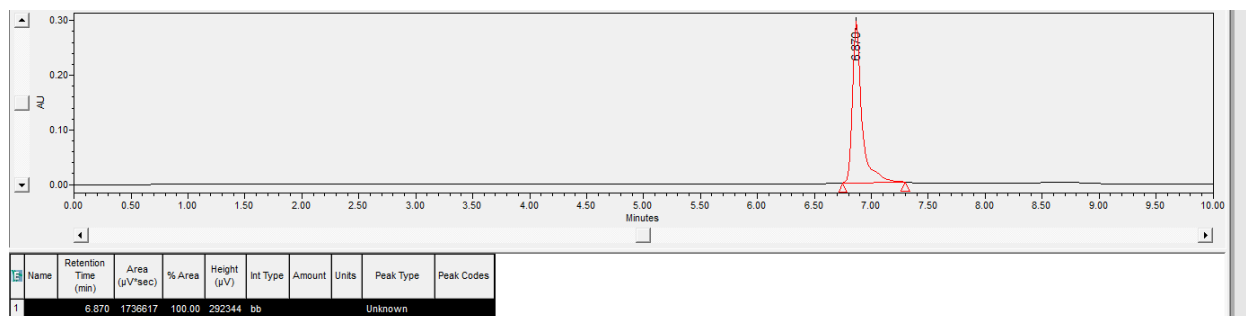

710

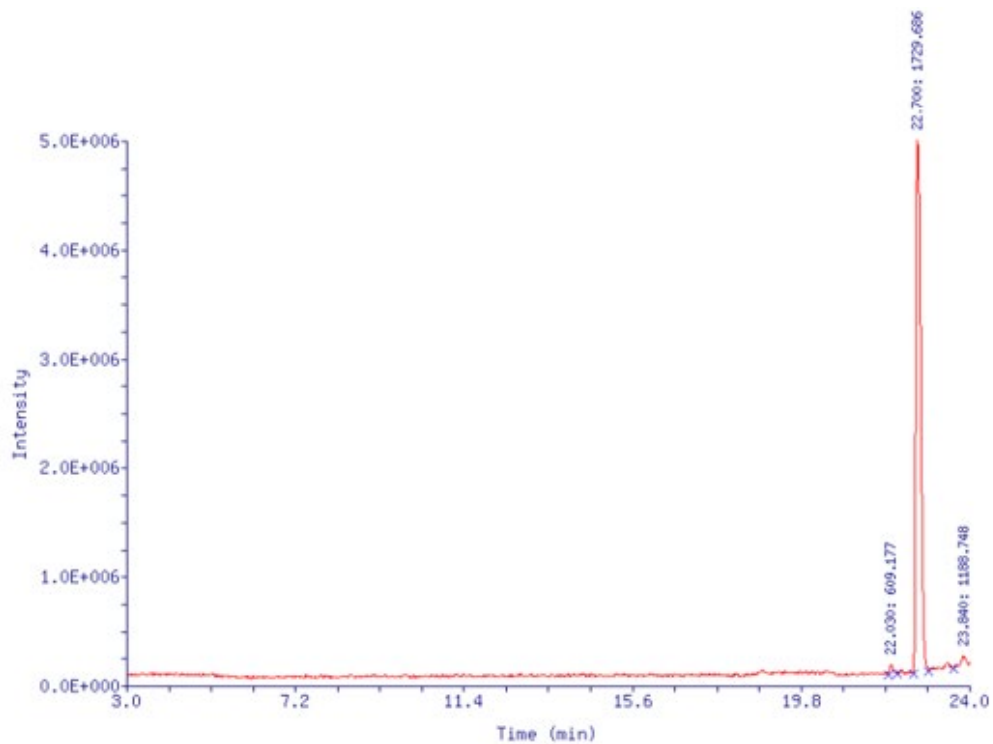

711

712 **Figure S30: HPLC (top) and LCMS (bottom) Chromatograms for RV89**

713 **RV80: HPLC:** Analytical HPLC trace of RV showing >98% purity. **LCMS:** Method: 2.1 x 100 mm Halo  
714 Peptide ES-C18, 2.7  $\mu\text{m}$ , 2-40% in 20 min after 1 min hold, 0.4 mL/min, 50  $^{\circ}\text{C}$ , A = 0.05% TFA in  $\text{H}_2\text{O}$ , B  
715 = 0.05% TFA in ACN. LC-MS (ESI<sup>+</sup>) calculated for  $\text{C}_{68}\text{H}_{79}\text{Cl}_2\text{N}_9\text{O}_{25}$  [M+H]<sup>+</sup>  $m/z$ : 1491.4564; found:  
716 1491.463; retention time = 8.1-8.9 minutes.

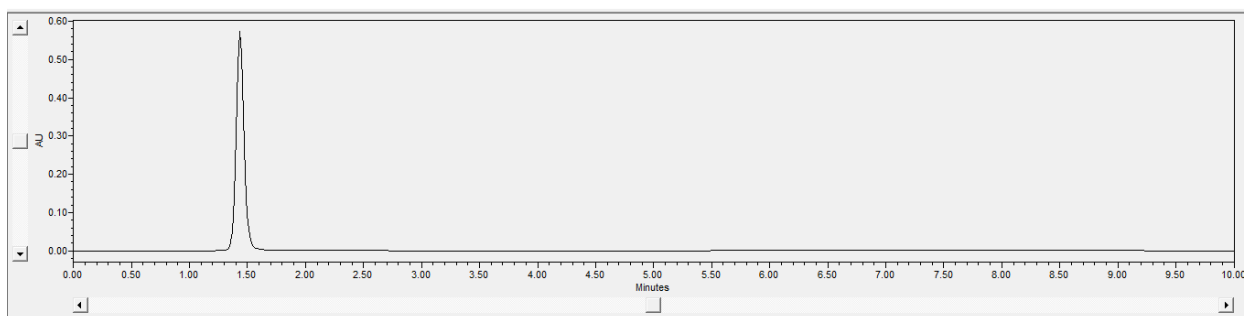

717

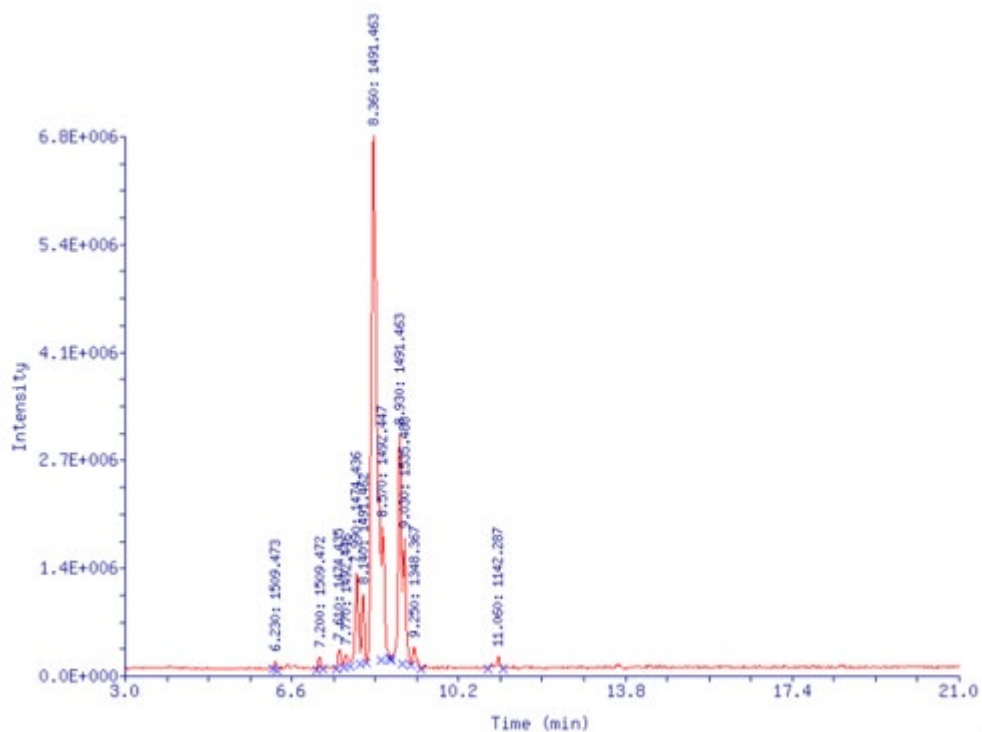

718

719 **Figure S31: HPLC (top) and LCMS (bottom) Chromatograms for RV80**

720 **RV124: HPLC:** Analytical HPLC trace of RV124 showing >98% purity. **LCMS:** Method: 2.1 x 100 mm  
 721 Waters HILIC, 1.6  $\mu$ m, 5-80% in 1.5 min after 1.5 min hold, 0.6 mL/min, 50 °C, A = 0.05% TFA in H<sub>2</sub>O, B  
 722 = 0.05% TFA in CAN; Waters QdA detector. LC-MS (ESI<sup>+</sup>) calculated for C<sub>76</sub>H<sub>93</sub>Cl<sub>2</sub>N<sub>9</sub>O<sub>26</sub> [M+2H]<sup>2+</sup> m/z:  
 723 809.8 ; found: 810.6; retention time = 2.0 minutes.

724

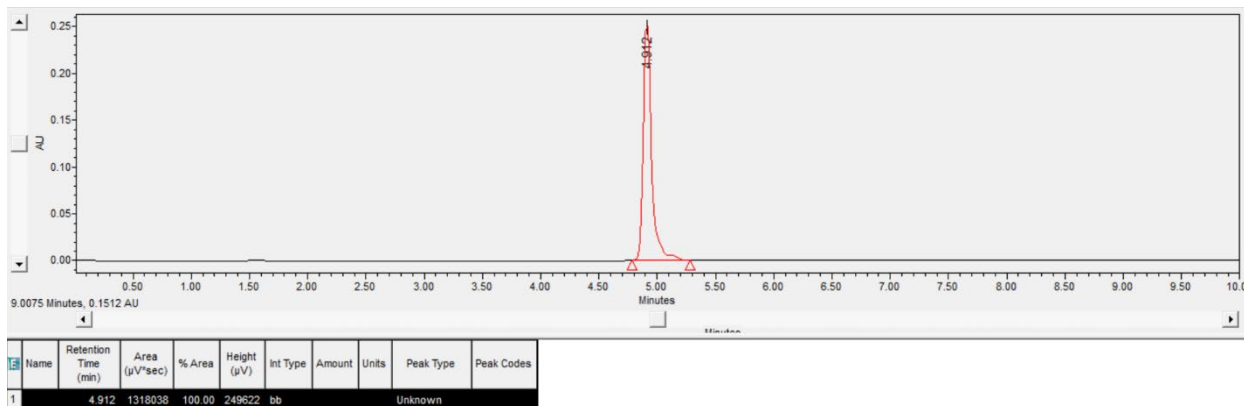

725

726

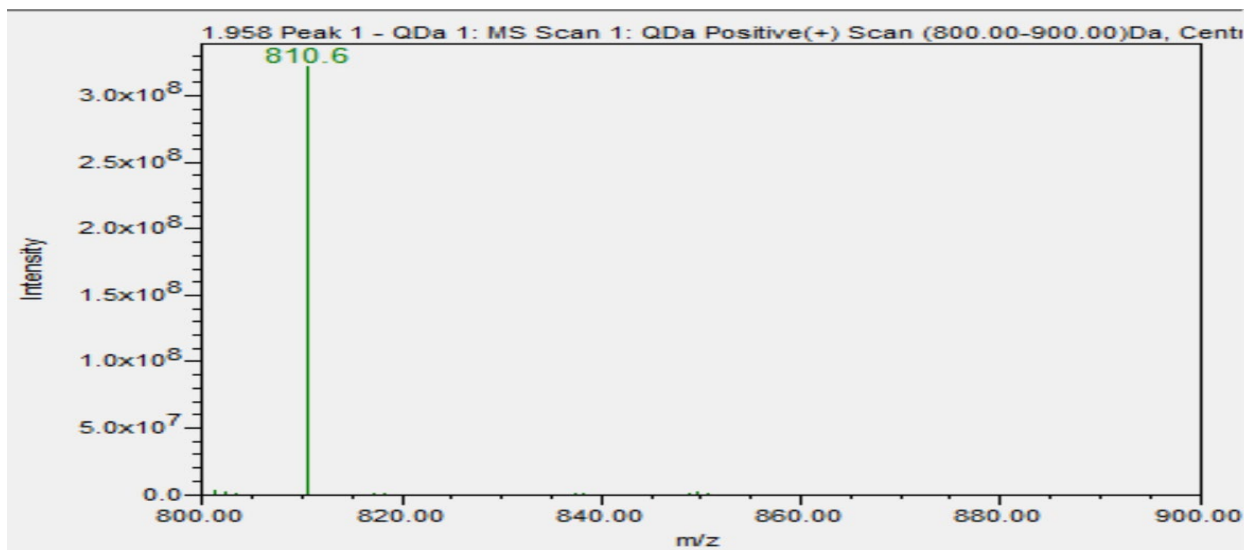

727

728 **Figure S32: HPLC (top) and LCMS (bottom) Chromatograms for RV124**

729 **RV55: HPLC:** Analytical HPLC trace of RV55 showing >98% purity. **LCMS:** Method: 2.1 x 100 mm Halo  
730 Peptide ES-C18, 2.7  $\mu\text{m}$ , 2-40% in 20 min after 1 min hold, 0.4 mL/min, 50  $^{\circ}\text{C}$ , A = 0.05% TFA in  $\text{H}_2\text{O}$ , B  
731 = 0.05% TFA in ACN. LC-MS (ESI<sup>+</sup>) calculated for  $\text{C}_{78}\text{H}_{97}\text{Cl}_2\text{N}_9\text{O}_{26}$  [M+H]<sup>+</sup>  $m/z$ : 1645.5922; found:  
732 1645.592; retention time = 16.5-16.9 minutes.

733

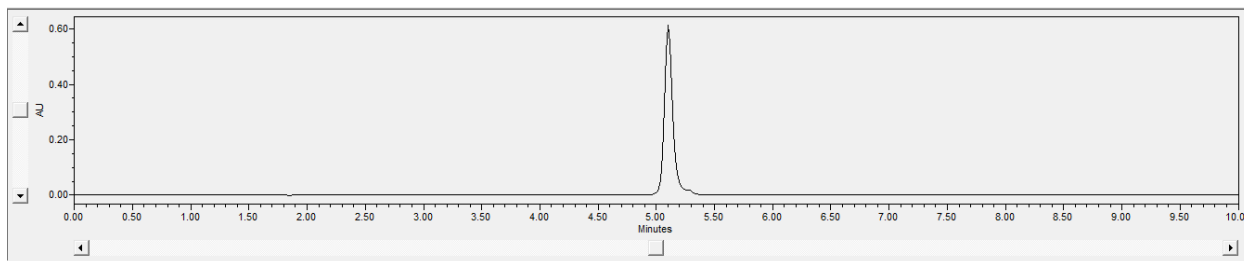

734

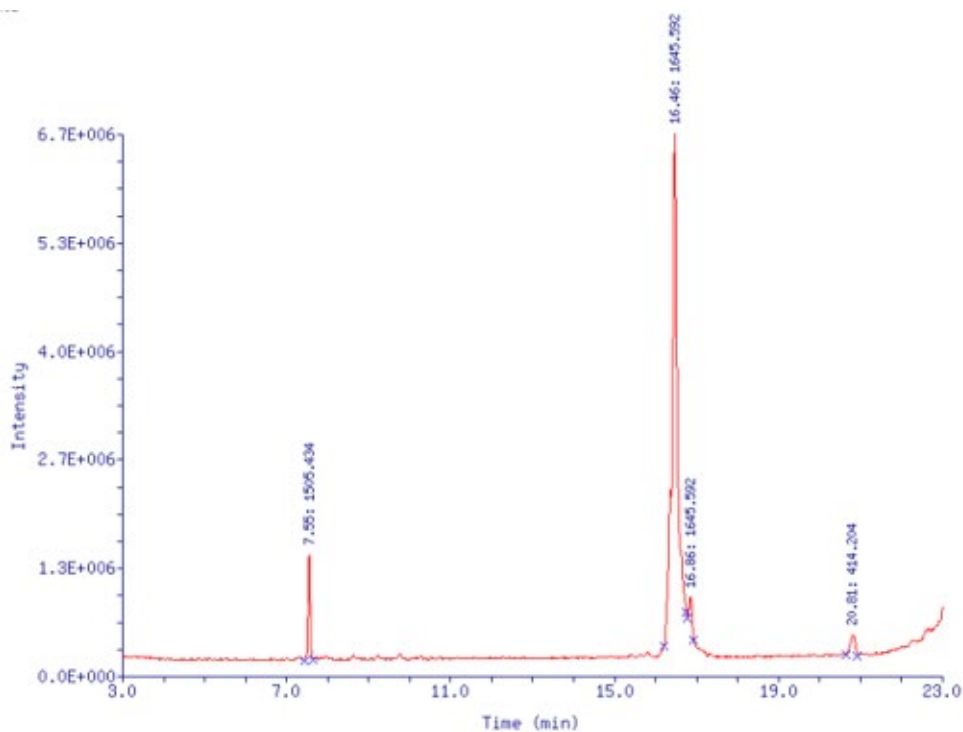

735

736 **Figure S33: HPLC (top) and LCMS (bottom) Chromatograms for RV55**

737 **RV126: HPLC:** Analytical HPLC trace of RV126 showing >90% purity. **LCMS:** Method: 2.1 x 100 mm  
738 Waters HILIC, 1.6  $\mu$ m, 5-80% in 1.5 min after 1.5 min hold, 0.6 mL/min, 50  $^{\circ}$ C, A = 0.05% TFA in H<sub>2</sub>O, B  
739 = 0.05% TFA in CAN; Waters QdA detector. LC-MS (ESI<sup>+</sup>) calculated for C<sub>80</sub>H<sub>101</sub>Cl<sub>2</sub>N<sub>9</sub>O<sub>26</sub> [M+2H]<sup>2+</sup> m/z:  
740 837.8 ; found: 838.0; retention time = 1.9 minutes.  
741

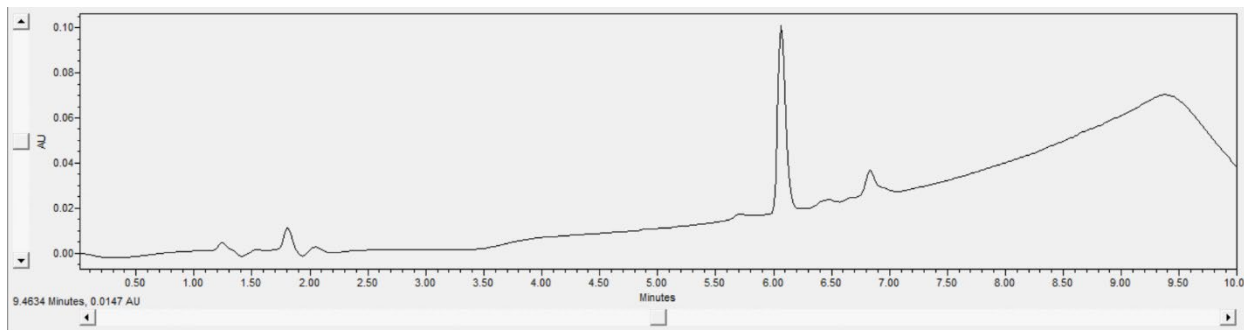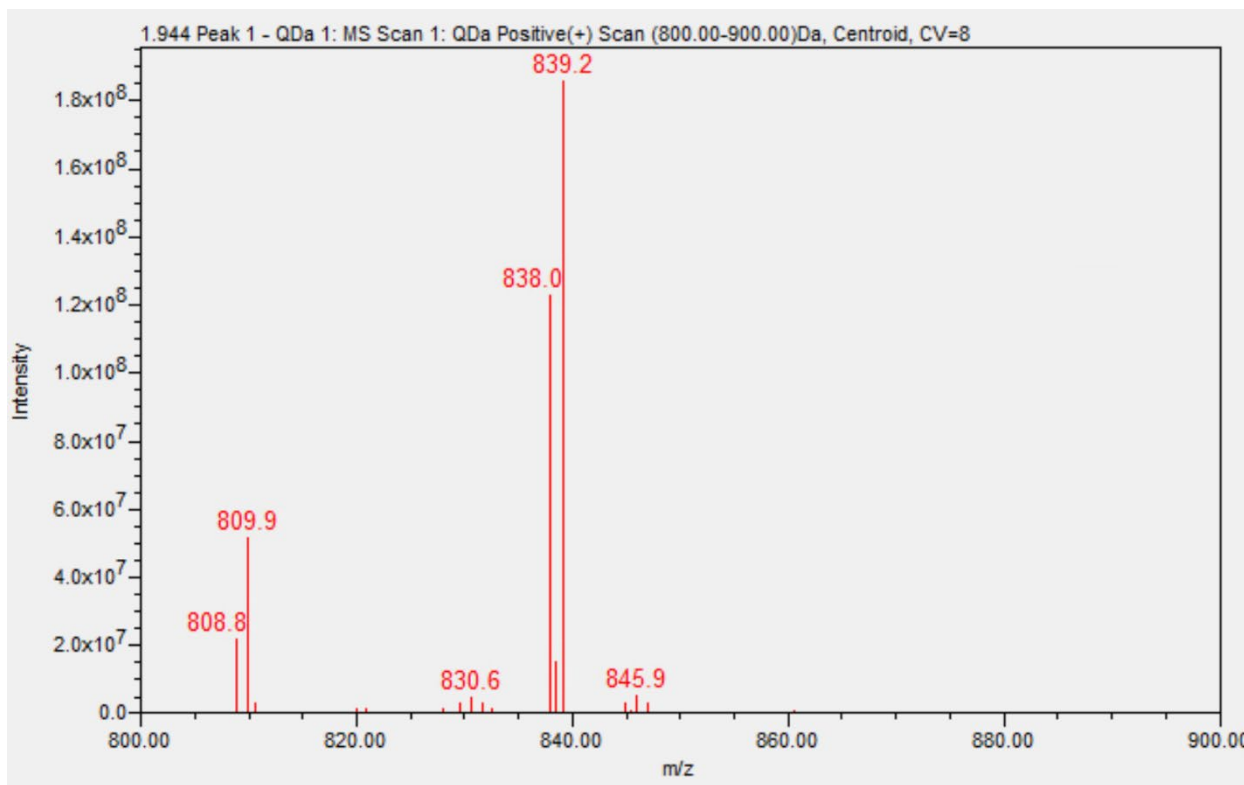

743  
744 **Figure S34: HPLC (top) and LCMS (bottom) Chromatograms for RV126**

745 **RV127: HPLC:** Analytical HPLC trace of RV127 showing >98% purity. **LCMS:** Method: 2.1 x 100 mm  
 746 Waters HILIC, 1.6  $\mu\text{m}$ , 5-80% in 1.5 min after 1.5 min hold, 0.6 mL/min, 50  $^{\circ}\text{C}$ , A = 0.05% TFA in  $\text{H}_2\text{O}$ , B  
 747 = 0.05% TFA in CAN; Waters QdA detector. LC-MS (ESI<sup>+</sup>) calculated for  $\text{C}_{82}\text{H}_{105}\text{Cl}_2\text{N}_9\text{O}_{26}$   $[\text{M}+2\text{H}]^{+2}$   $m/z$ :  
 748 851.8 ; found: 852.7; retention time = 1.9 minutes.

749

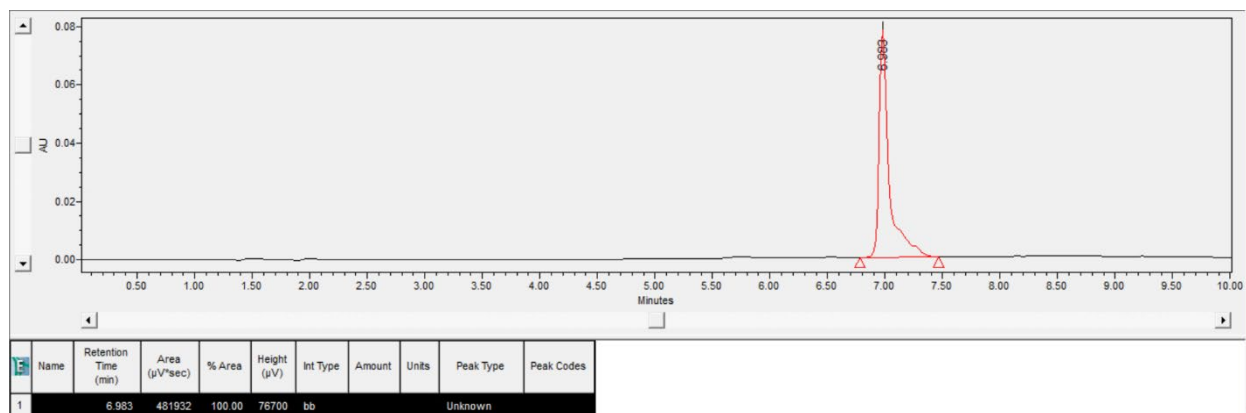

750

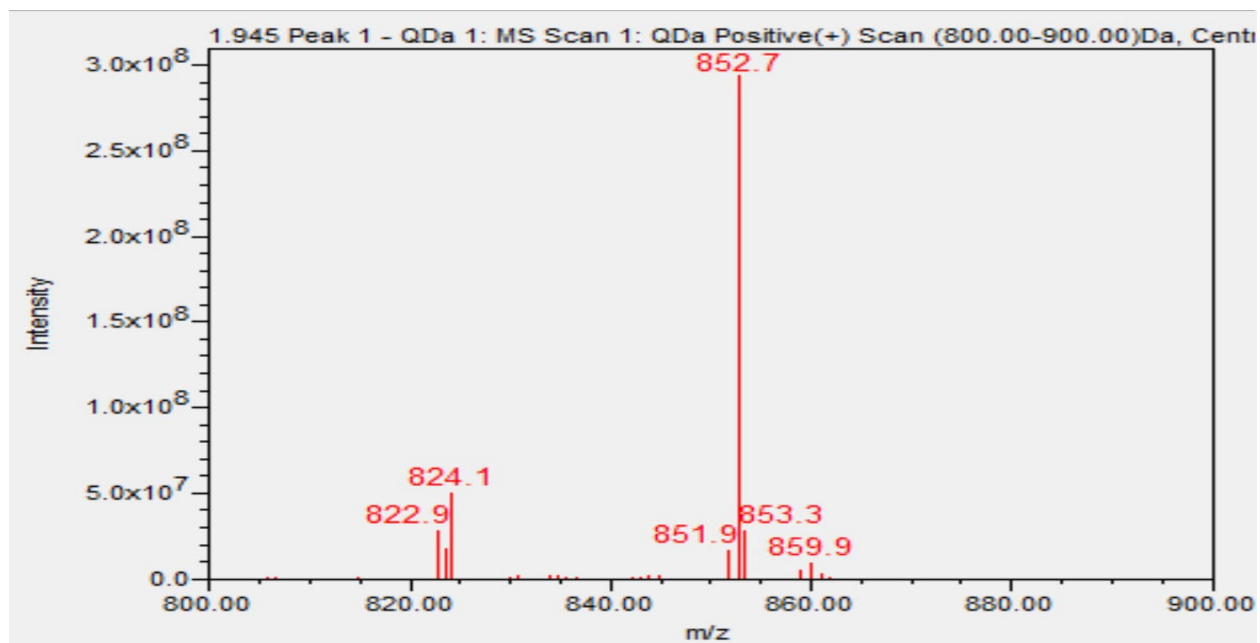

751

752 **Figure S35: HPLC (top) and LCMS (bottom) Chromatograms for RV127**

753 **RV128: HPLC:** Analytical HPLC trace of RV128 showing >98% purity. **LCMS:** Method: 2.1 x 100 mm Halo  
754 Peptide ES-C18, 2.7  $\mu\text{m}$ , 2-40% in 20 min after 1 min hold, 0.4 mL/min, 50  $^{\circ}\text{C}$ , A = 0.05% TFA in  $\text{H}_2\text{O}$ , B  
755 = 0.05% TFA in ACN. LC-MS (ESI $^{+}$ ) calculated for  $\text{C}_{84}\text{H}_{109}\text{Cl}_2\text{N}_9\text{O}_{26}$   $[\text{M}+\text{H}]^{+}$   $m/z$ : 1729.6861; found:  
756 1729.681; retention time = 17.5 minutes.

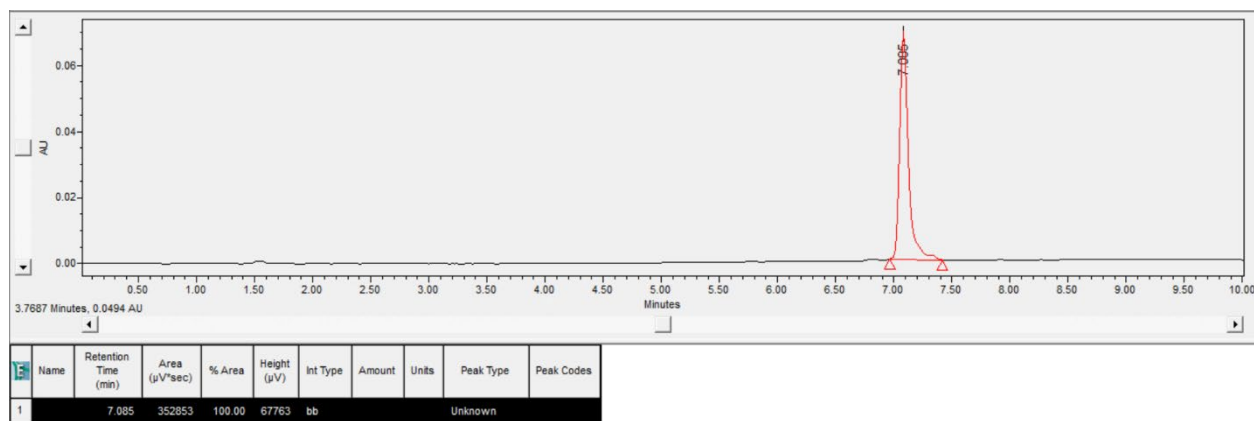

757

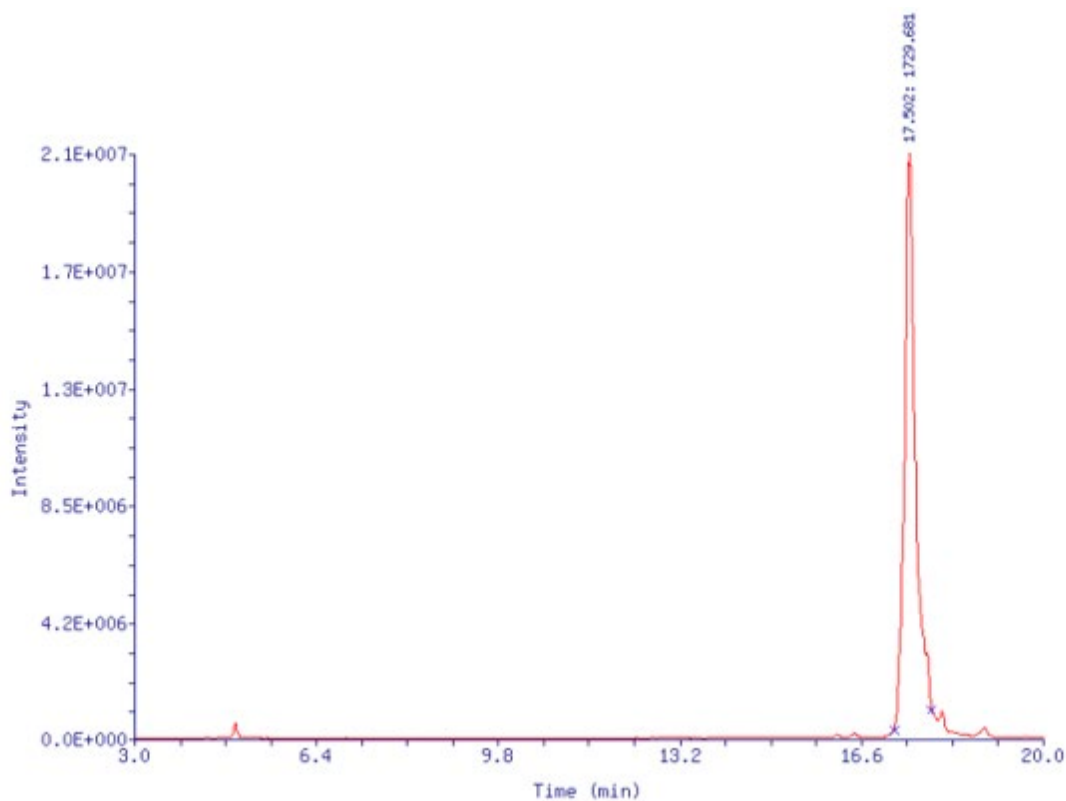

758

759 **Figure S36: HPLC (top) and LCMS (bottom) Chromatograms for RV128**



760 **RV101: HPLC:** Analytical HPLC trace of RV101 showing >98% purity. **LCMS:** Method: 2.1 x 100 mm Halo  
 761 Peptide ES-C18, 2.7 μm, 2-40% in 20 min after 1 min hold, 0.4 mL/min, 50 °C, A = 0.05% TFA in H<sub>2</sub>O, B  
 762 = 0.05% TFA in ACN. LC-MS (ESI<sup>+</sup>) calculated for C<sub>68</sub>H<sub>77</sub>Cl<sub>2</sub>N<sub>9</sub>O<sub>26</sub> [M+H]<sup>+</sup> *m/z*: 1505.4357; found: 1505.43;  
 763 retention time = 8.7-9.0 minutes.

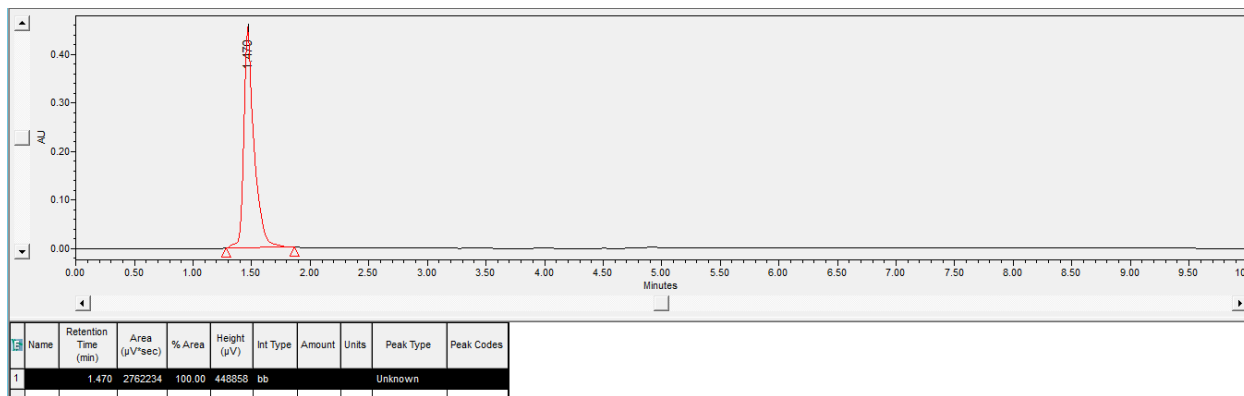

764

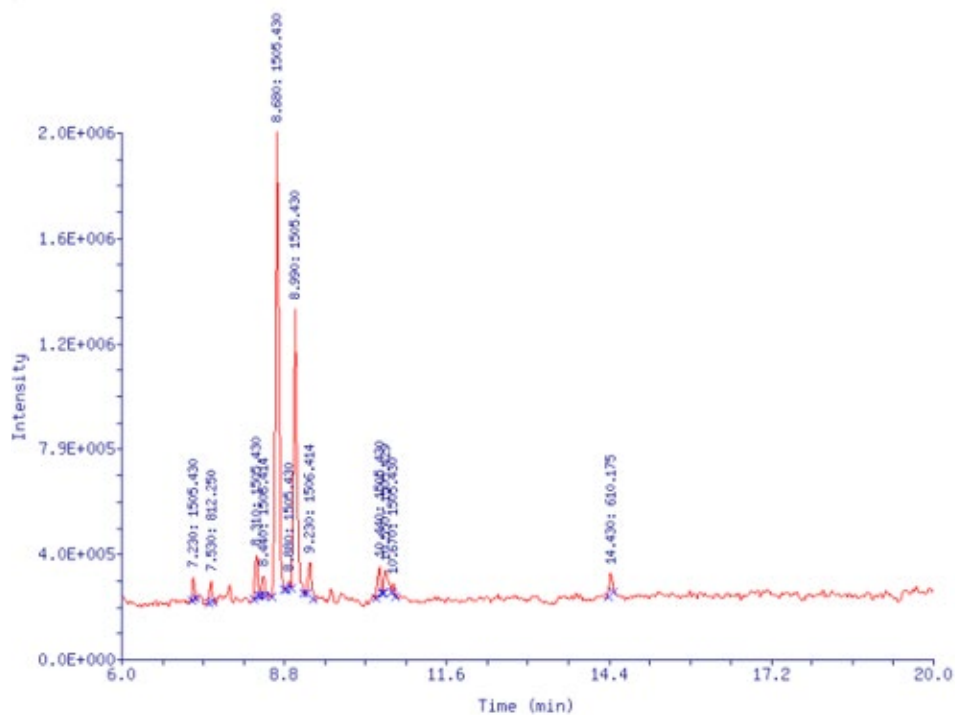

765

766 **Figure S37: HPLC (top) and LCMS (bottom) Chromatograms for RV101**

767 **RV93: HPLC:** Analytical HPLC trace of RV93 showing >98% purity. **LCMS:** Method: 2.1 x 100 mm Halo  
768 Peptide ES-C18, 2.7  $\mu\text{m}$ , 2-40% in 20 min after 1 min hold, 0.4 mL/min, 50  $^{\circ}\text{C}$ , A = 0.05% TFA in  $\text{H}_2\text{O}$ , B  
769 = 0.05% TFA in ACN. LC-MS (ESI<sup>+</sup>) calculated for  $\text{C}_{76}\text{H}_{94}\text{Cl}_2\text{N}_{10}\text{O}_{25}$  [M+H]<sup>+</sup> *m/z*: 1616.5769; found:  
770 1616.577; retention time = 13.6-13.9 minutes.

771

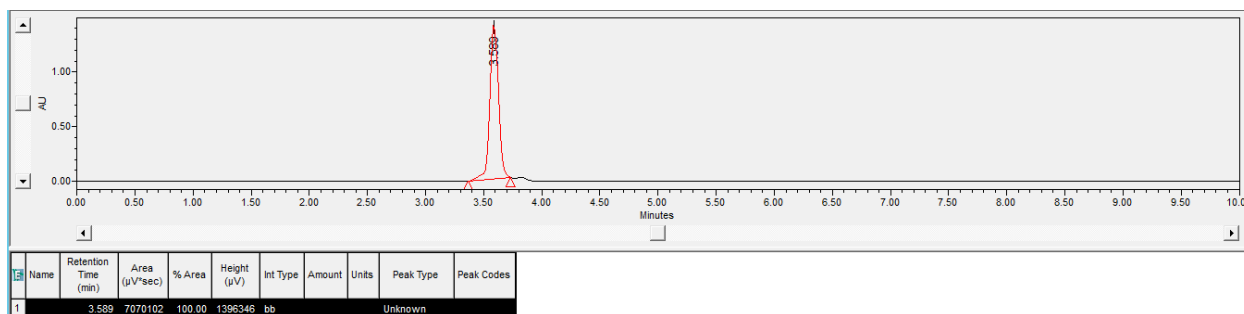

772

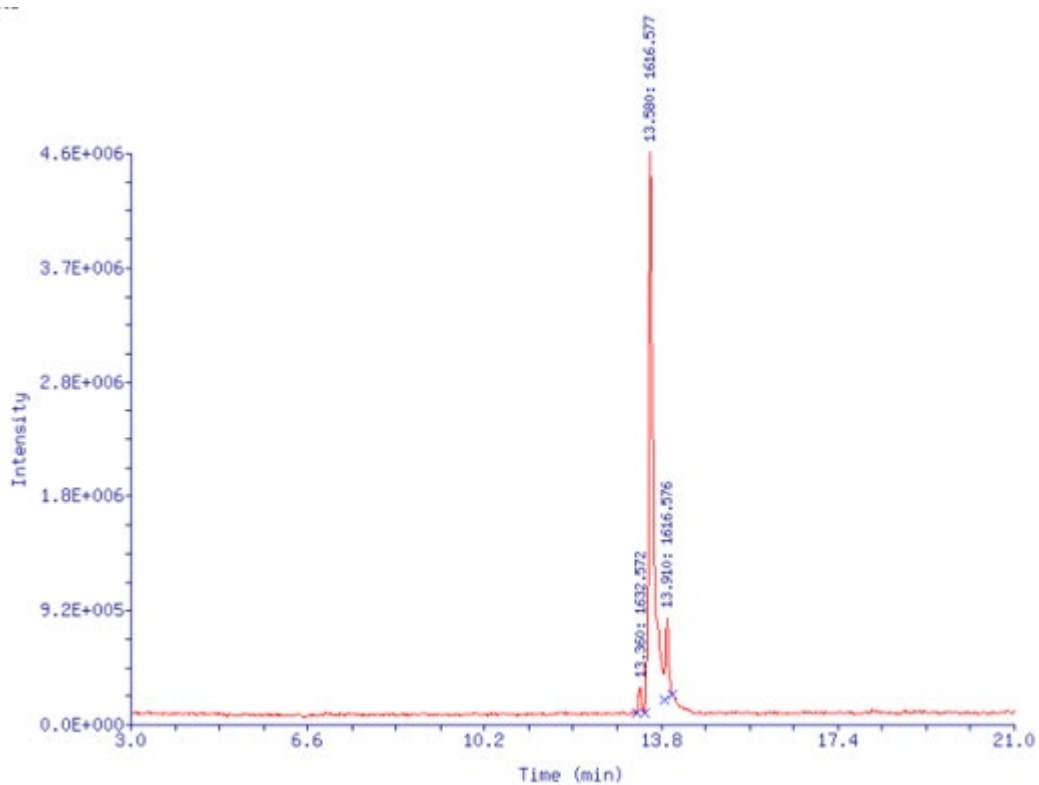

773

774 **Figure S38: HPLC (top) and LCMS (bottom) Chromatograms for RV93**

775 **RV56: HPLC:** Analytical HPLC trace of RV56 showing >98% purity. **LCMS:** Method: 2.1 x 100 mm Halo  
776 Peptide ES-C18, 2.7 μm, 2-40% in 20 min after 1 min hold, 0.4 mL/min, 50 °C, A = 0.05% TFA in H<sub>2</sub>O, B  
777 = 0.05% TFA in ACN. LC-MS (ESI<sup>+</sup>) calculated for C<sub>78</sub>H<sub>98</sub>Cl<sub>2</sub>N<sub>10</sub>O<sub>25</sub> [M+H]<sup>+</sup> *m/z*: 1644.6082; found:  
778 1644.608; retention time = 14.2-14.5 minutes.

779

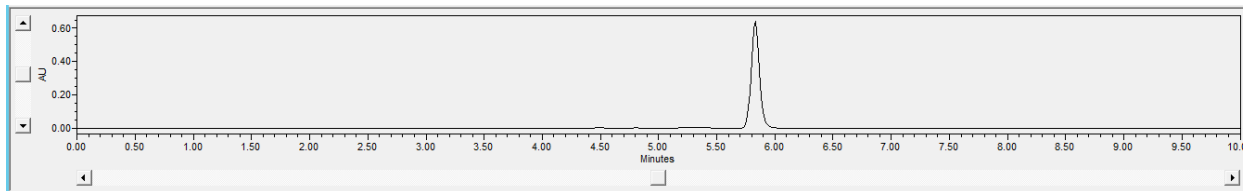

780

781

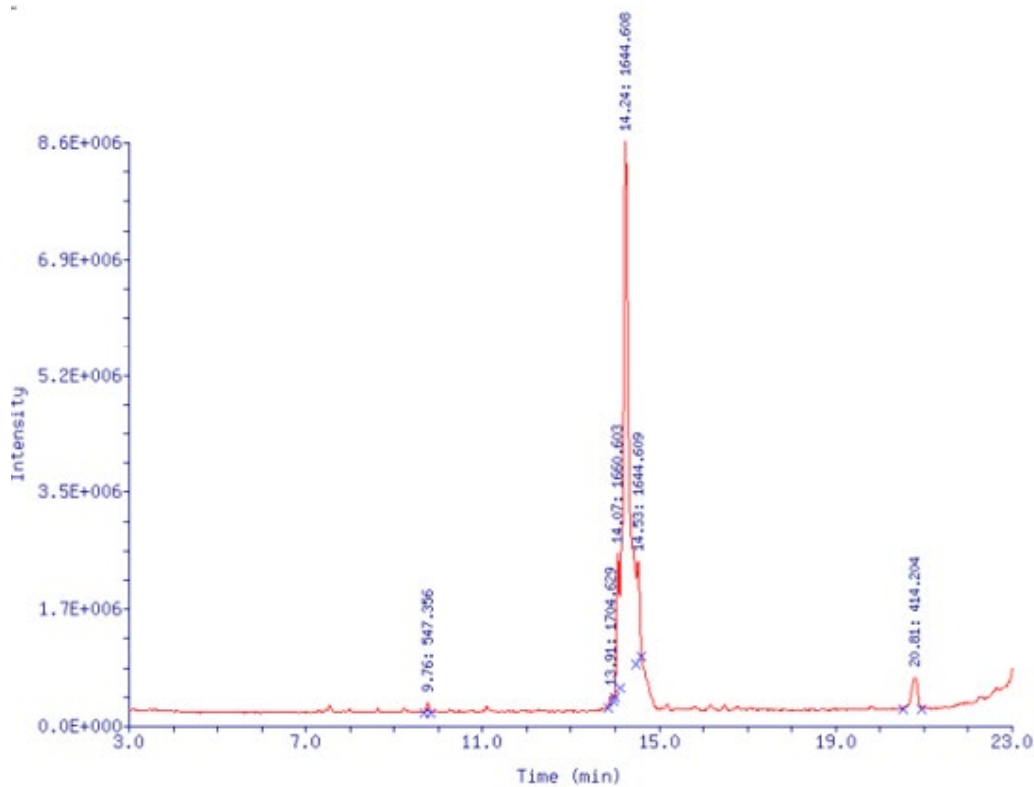

782

783 **Figure S39: HPLC (top) and LCMS (bottom) Chromatograms for RV56**

784 **RV62: HPLC:** Analytical HPLC trace of RV62 showing >98% purity. **LCMS:** Method: 2.1 x 100 mm Halo  
 785 Peptide ES-C18, 2.7  $\mu\text{m}$ , 2-40% in 20 min after 1 min hold, 0.4 mL/min, 50  $^{\circ}\text{C}$ , A = 0.05% TFA in  $\text{H}_2\text{O}$ , B  
 786 = 0.05% TFA in ACN. LC-MS (ESI $^{+}$ ) calculated for  $\text{C}_{80}\text{H}_{102}\text{Cl}_2\text{N}_{10}\text{O}_{25}$   $[\text{M}+\text{H}]^{+}$   $m/z$ : 1672.6395; found:  
 787 1672.638; retention time = 19.2-19.4 minutes.

788

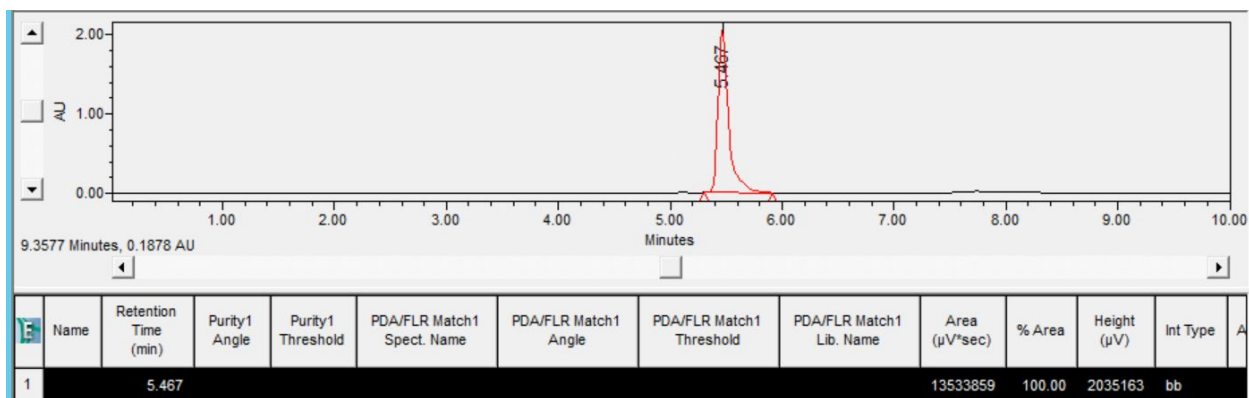

789

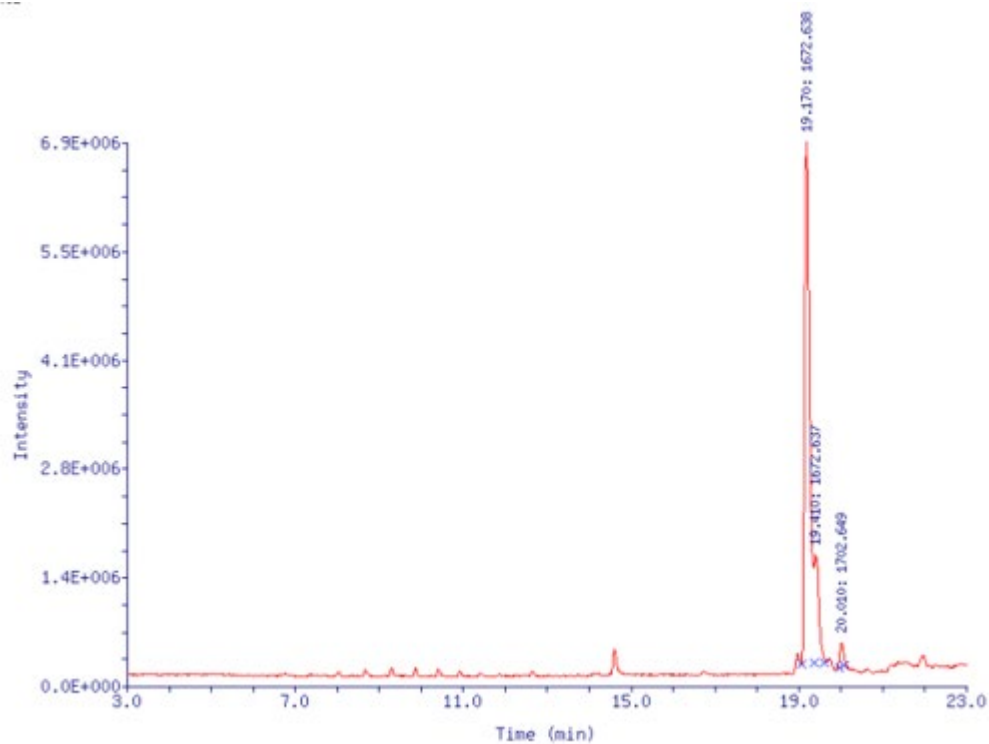

790

791 **Figure S40: HPLC (top) and LCMS (bottom) Chromatograms for RV62**

792 **RV92: HPLC:** Analytical HPLC trace of RV92 showing >98% purity. **LCMS:** Method: 2.1 x 100 mm Halo  
793 Peptide ES-C18, 2.7  $\mu\text{m}$ , 2-40% in 20 min after 1 min hold, 0.4 mL/min, 50  $^{\circ}\text{C}$ , A = 0.05% TFA in  $\text{H}_2\text{O}$ , B  
794 = 0.05% TFA in ACN. LC-MS (ESI<sup>+</sup>) calculated for  $\text{C}_{82}\text{H}_{106}\text{Cl}_2\text{N}_{10}\text{O}_{25}$  [M+H]<sup>+</sup>  $m/z$ : 1700.6708; found:  
795 1600.671; retention time = 21.7 minutes.  
796

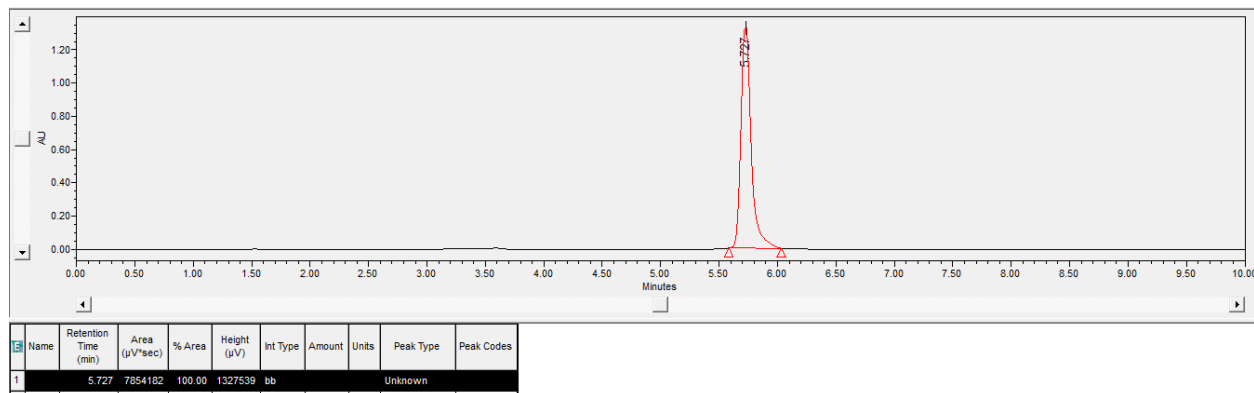

797

798

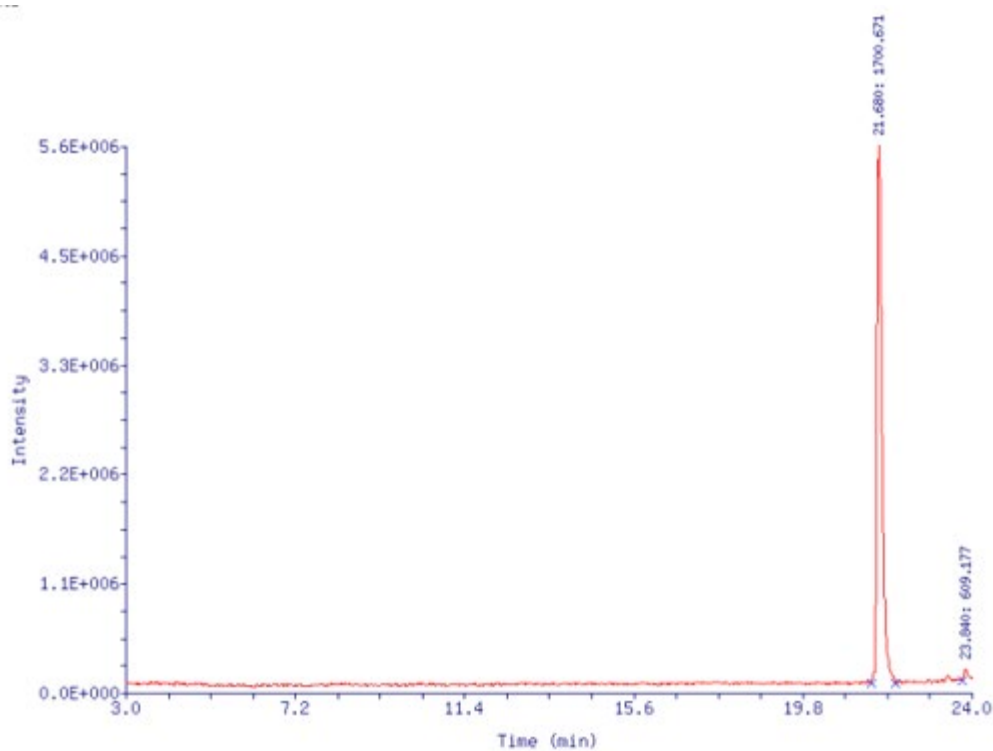

799

800 **Figure S41: HPLC (top) and LCMS (bottom) Chromatograms for RV92**

801 **RV91: HPLC:** Analytical HPLC trace of RV91 showing >98% purity. **LCMS:** Method: 2.1 x 100 mm Halo  
802 Peptide ES-C18, 2.7 μm, 2-40% in 20 min after 1 min hold, 0.4 mL/min, 50 °C, A = 0.05% TFA in H<sub>2</sub>O, B  
803 = 0.05% TFA in ACN. LC-MS (ESI<sup>+</sup>) calculated for C<sub>84</sub>H<sub>110</sub>Cl<sub>2</sub>N<sub>10</sub>O<sub>25</sub> [M+H]<sup>+</sup> m/z: 1728.7021; found:  
804 1727.703; retention time = 22.4 minutes.

805

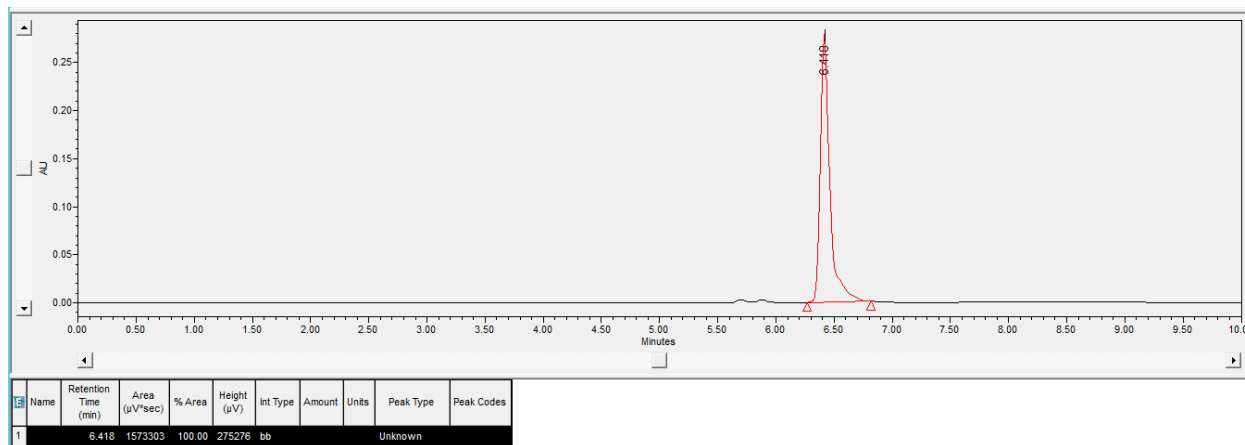

806

807

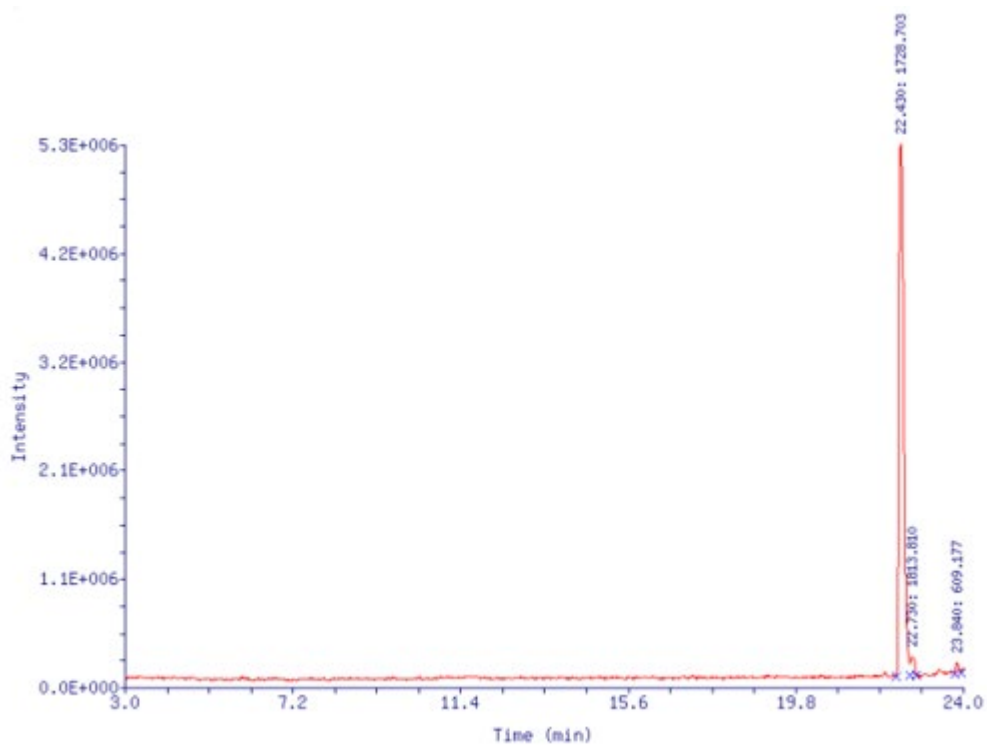

808

809 **Figure S42: HPLC (top) and LCMS (bottom) Chromatograms for RV91**

810 **RV82-FMOC: HPLC:** Analytical HPLC trace of RV82 showing >98% purity

811

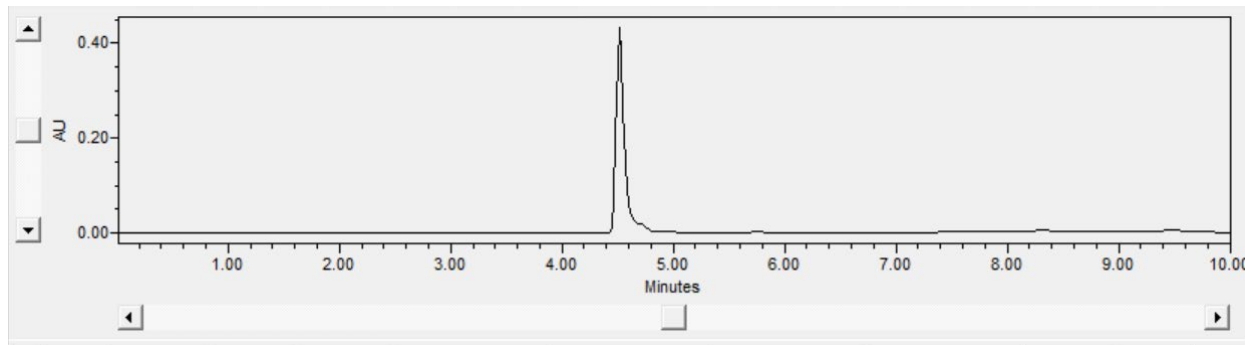

812

813 **Figure S43: HPLC chromatograms for RV82-FMOC**

814 **RV82: HPLC:** Analytical HPLC trace of RV82 showing >98% purity. **LCMS:** Method: 2.1 x 100 mm Halo

815 Peptide ES-C18, 2.7  $\mu$ m, 2-40% in 20 min after 1 min hold, 0.4 mL/min, 50  $^{\circ}$ C, A = 0.05% TFA in H<sub>2</sub>O, B

816 = 0.05% TFA in ACN. LC-MS (ESI<sup>+</sup>) calculated for C<sub>68</sub>H<sub>80</sub>Cl<sub>2</sub>N<sub>10</sub>O<sub>24</sub> [M+H]<sup>+</sup> m/z: 1490.4724; found:

817 1490.478; retention time = 8.0-8.4 minutes.

818

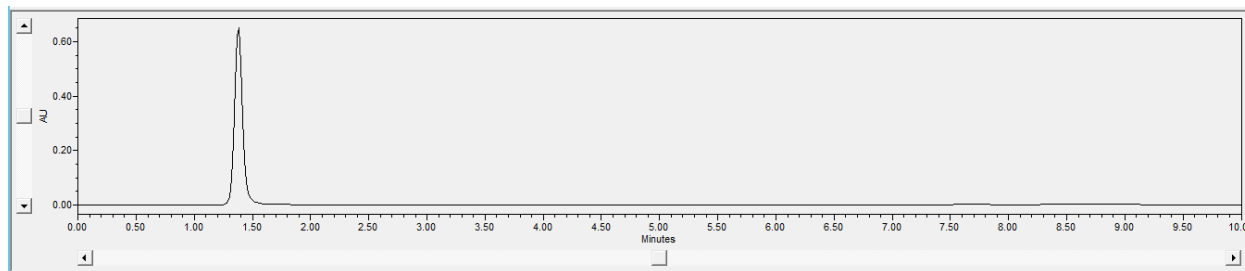

819

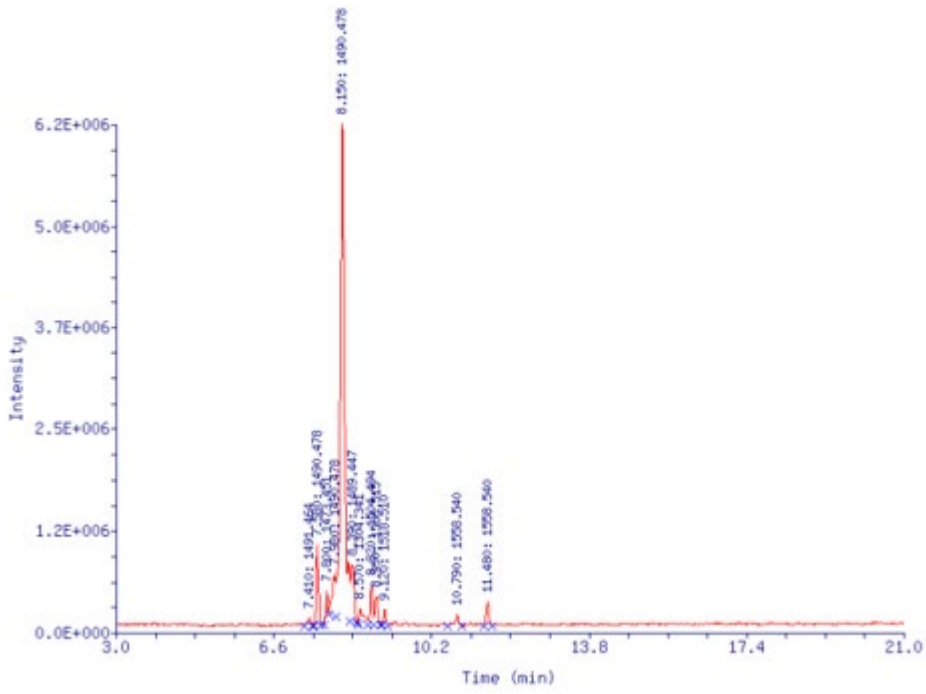

820

821 Figure S44: HPLC (top) and LCMS (bottom) Chromatograms for RV82



822 **RV121: HPLC:** Analytical HPLC trace of RV121 showing >98% purity. **LCMS:** Method: 2.1 x 100 mm Halo  
 823 Peptide ES-C18, 2.7 μm, 2-40% in 20 min after 1 min hold, 0.4 mL/min, 50 °C, A = 0.05% TFA in H<sub>2</sub>O, B  
 824 = 0.05% TFA in ACN. LC-MS (ESI<sup>+</sup>) calculated for C<sub>76</sub>H<sub>94</sub>Cl<sub>2</sub>N<sub>10</sub>O<sub>25</sub> [M+H]<sup>+</sup> *m/z*: 1616.5769; found:  
 825 1616.579; retention time = 15.7 minutes.

826

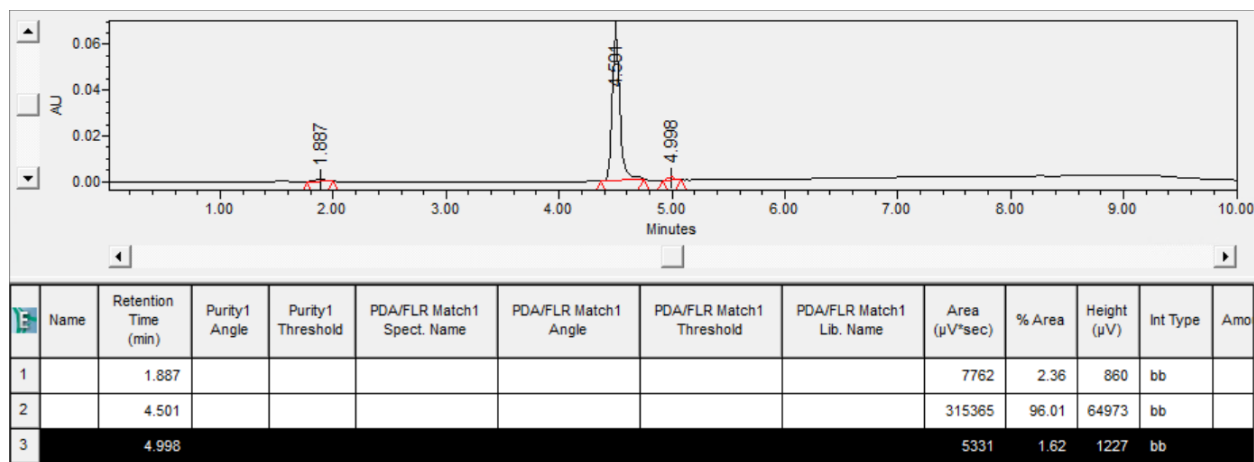

827

828

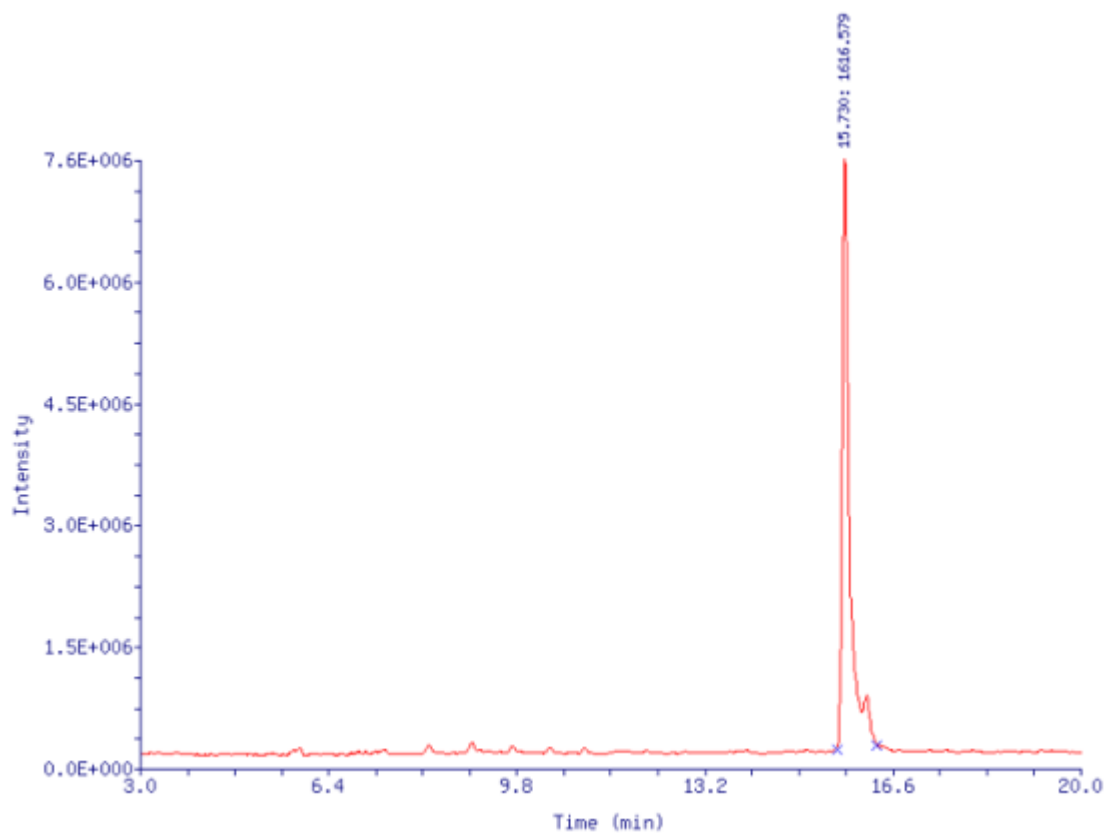

829

830 **Figure S45: HPLC (top) and LCMS (bottom) Chromatograms for RV121**

831 **RV94: HPLC:** Analytical HPLC trace of RV94 showing >98% purity. **LCMS:** Method: 2.1 x 100 mm Halo  
 832 Peptide ES-C18, 2.7  $\mu\text{m}$ , 2-40% in 20 min after 1 min hold, 0.4 mL/min, 50  $^{\circ}\text{C}$ , A = 0.05% TFA in  $\text{H}_2\text{O}$ , B  
 833 = 0.05% TFA in ACN. LC-MS (ESI $^{+}$ ) calculated for  $\text{C}_{78}\text{H}_{98}\text{Cl}_2\text{N}_{10}\text{O}_{25}$   $[\text{M}+\text{H}]^{+}$   $m/z$ : 1644.6082; found:  
 834 1644.607; retention time = 18.4-18.8 minutes.

835

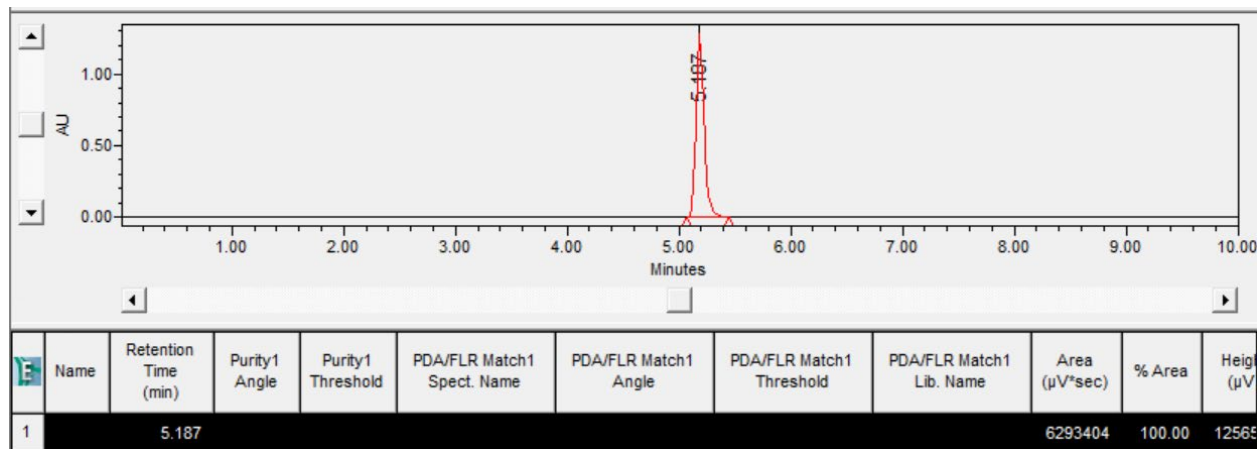

836

837

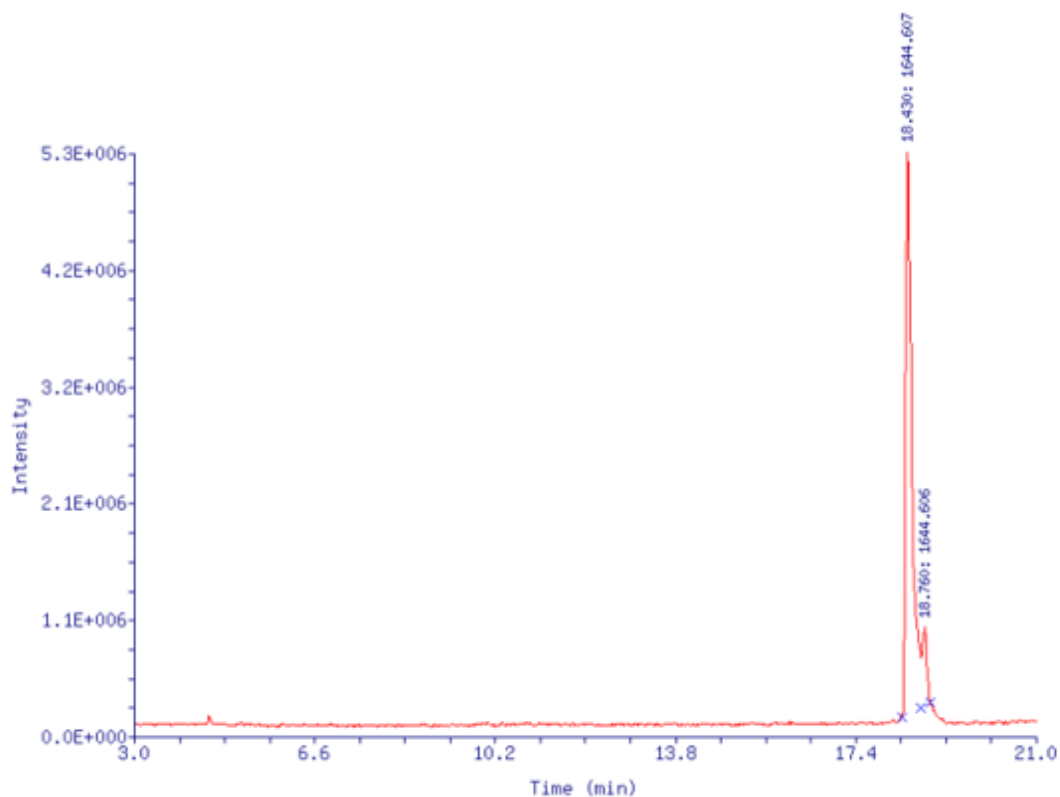

838

839 **Figure S46: HPLC (top) and LCMS (bottom) Chromatograms for RV94**

840 **RV95: HPLC:** Analytical HPLC trace of RV95 showing >98% purity. **LCMS:** Method: 2.1 x 100 mm Halo  
841 Peptide ES-C18, 2.7  $\mu\text{m}$ , 2-40% in 20 min after 1 min hold, 0.4 mL/min, 50  $^{\circ}\text{C}$ , A = 0.05% TFA in  $\text{H}_2\text{O}$ , B  
842 = 0.05% TFA in ACN. LC-MS (ESI $^{+}$ ) calculated for  $\text{C}_{80}\text{H}_{102}\text{Cl}_2\text{N}_{10}\text{O}_{25}$   $[\text{M}+\text{H}]^{+}$   $m/z$ : 1672.6395; found:  
843 1672.638; retention time = 21.1 minutes.  
844

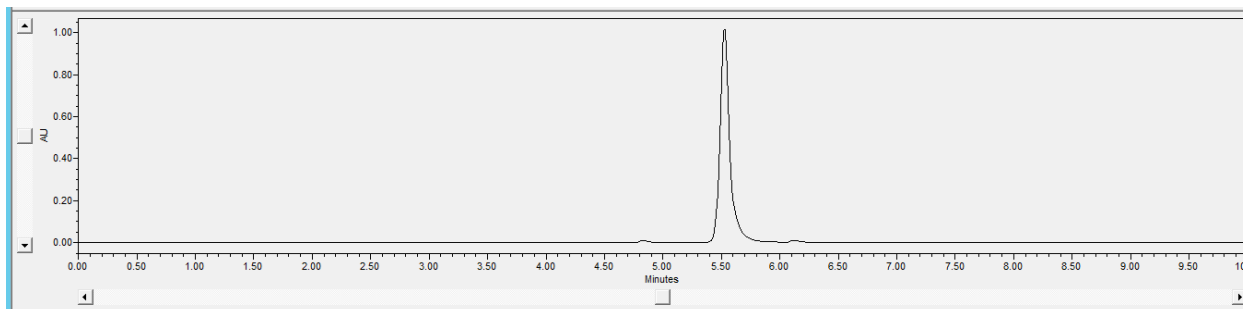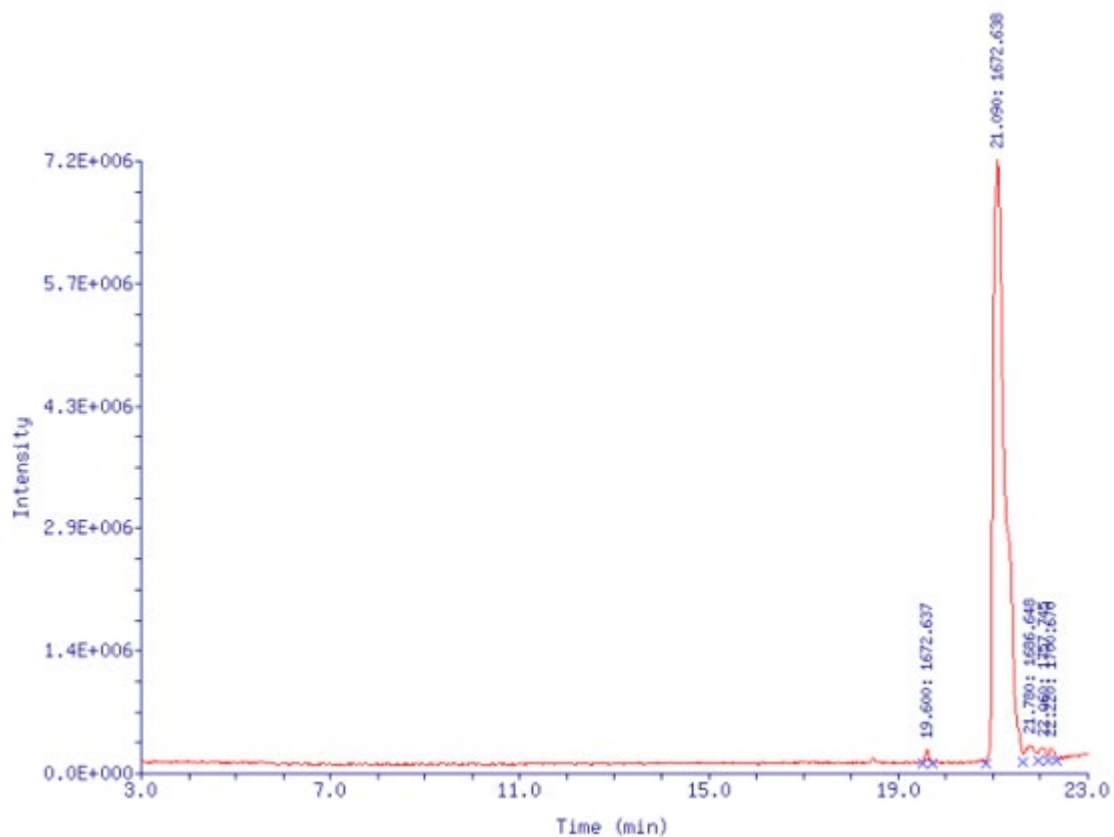

847  
848 **Figure S47: HPLC (top) and LCMS (bottom) Chromatograms for RV95**  
849

850 **RV130: HPLC:** Analytical HPLC trace of RV130 showing >98% purity. **LCMS:** Method: 2.1 x 100 mm Halo  
851 Peptide ES-C18, 2.7  $\mu\text{m}$ , 2-40% in 20 min after 1 min hold, 0.4 mL/min, 50  $^{\circ}\text{C}$ , A = 0.05% TFA in  $\text{H}_2\text{O}$ , B  
852 = 0.05% TFA in ACN. LC-MS (ESI $^{+}$ ) calculated for  $\text{C}_{82}\text{H}_{106}\text{Cl}_2\text{N}_{10}\text{O}_{25}$   $[\text{M}+\text{H}]^{+}$   $m/z$ : 1700.6708; found:  
853 1700.671; retention time = 15.3 minutes.

854

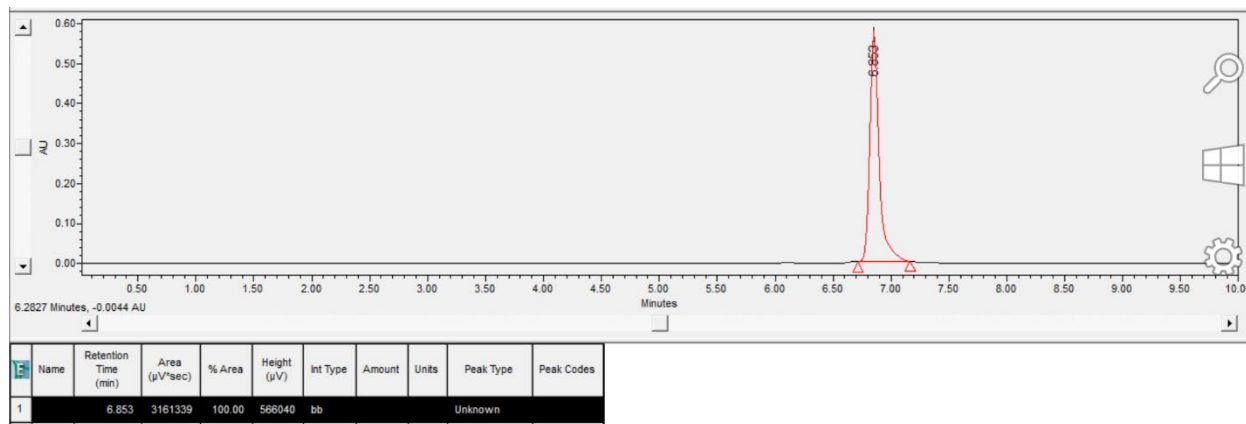

855

856

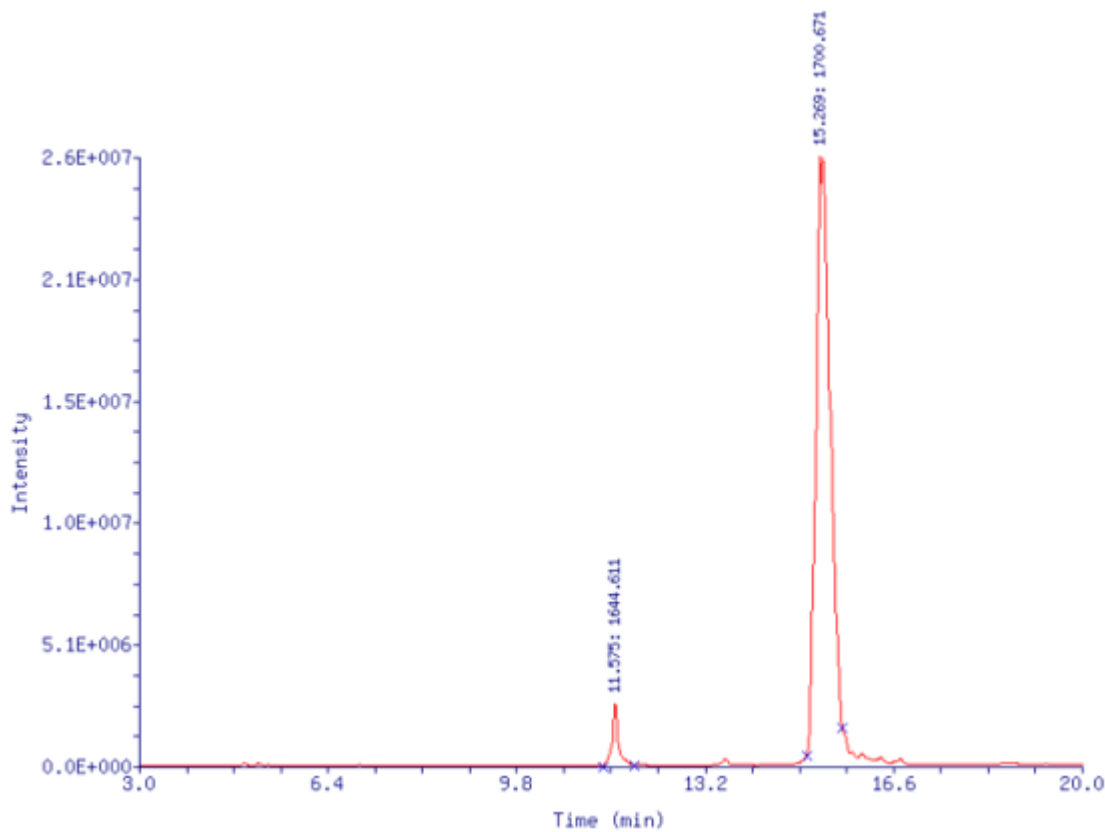

857

858 **Figure S48: HPLC (top) and LCMS (bottom) Chromatograms for RV130**

859 **RV131: HPLC:** Analytical HPLC trace of RV131 showing >98% purity. **LCMS:** Method: 2.1 x 100 mm Halo  
860 Peptide ES-C18, 2.7  $\mu\text{m}$ , 2-40% in 20 min after 1 min hold, 0.4 mL/min, 50  $^{\circ}\text{C}$ , A = 0.05% TFA in  $\text{H}_2\text{O}$ , B  
861 = 0.05% TFA in ACN. LC-MS (ESI $^{+}$ ) calculated for  $\text{C}_{84}\text{H}_{110}\text{Cl}_2\text{N}_{10}\text{O}_{25}$   $[\text{M}+\text{H}]^{+}$   $m/z$ : 1728.7021; found:  
862 1728.701; retention time = 17.2 minutes.

863

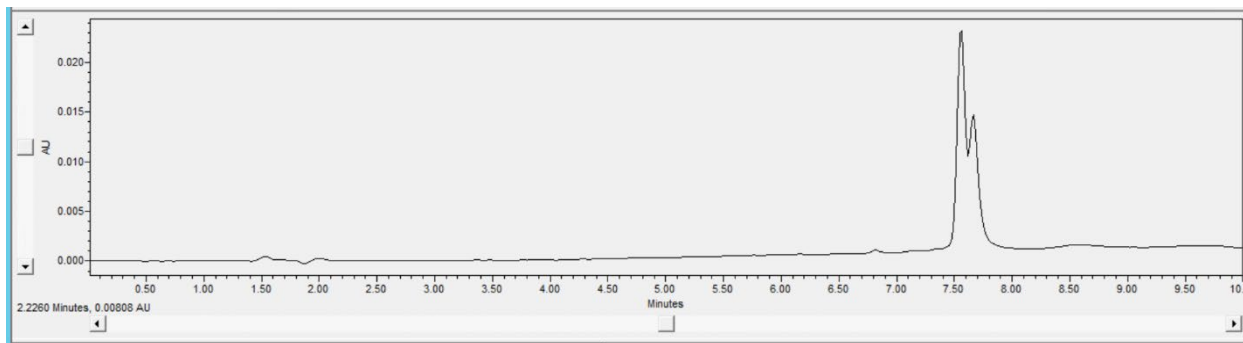

864

865

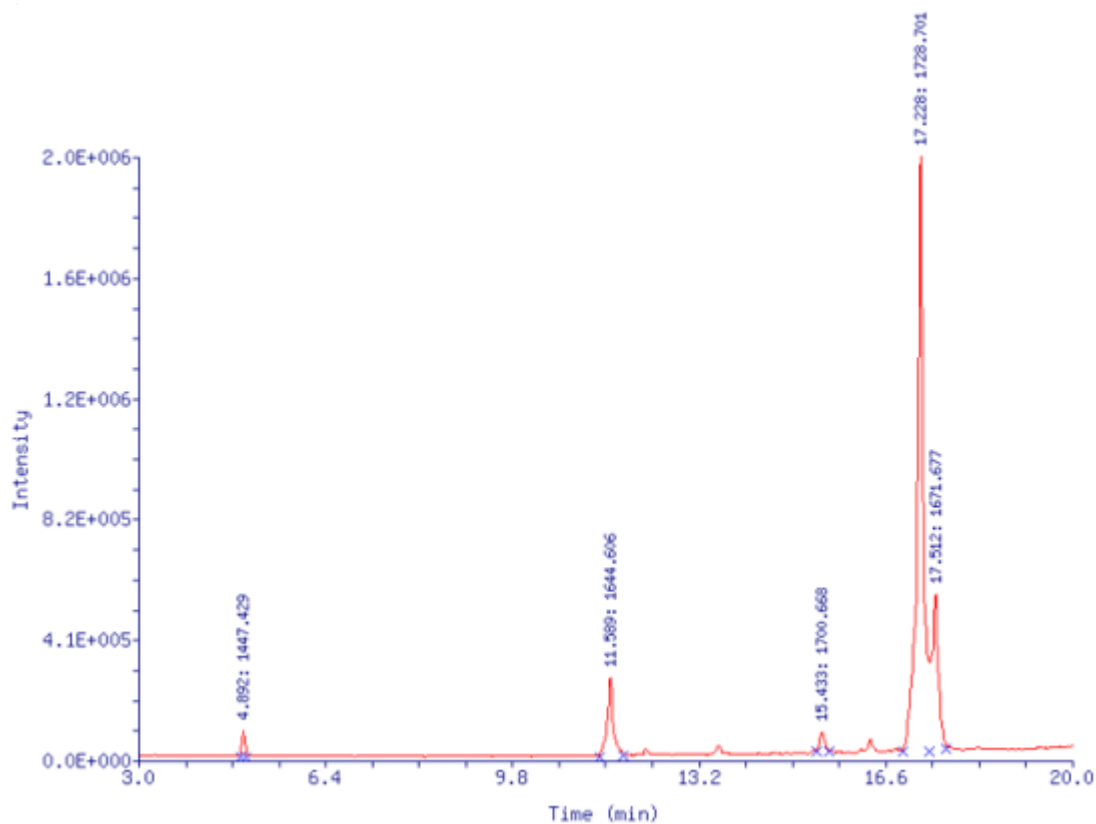

866

867 **Figure S49: HPLC (top) and LCMS (bottom) Chromatograms for RV131**

868

869 1. Leadbetter MR, Adams SM, Bazzini B, Fatheree PR, Karr DE, Krause KM, Lam BM, Linsell MS, Nodwell  
870 MB, Pace JL, Quast K, Shaw JP, Soriano E, Trapp SG, Villena JD, Wu TX, Christensen BG, Judice JK. 2004.  
871 Hydrophobic vancomycin derivatives with improved ADME properties: discovery of telavancin (TD-6424). J  
872 Antibiot (Tokyo) 57:326-36.

873
